# Supplementary material for: Clustered intergenic region sequences as predictors of factor H Binding Protein expression patterns and for assessing Neisseria meningitidis strain coverage by meningococcal vaccines
Source: PLoS One. 2018 May 30;13(5):e0197186. doi: 10.1371/journal.pone.0197186 (PMC5976157; doi:10.1371/journal.pone.0197186)
Supplement: S1 Table — This file contains a spreadsheet with genome ID numbers, isolate information, alleles for the fHbp and cbba nucleotide and amino acid sequences, and homologies of the amino acid sequences to vaccine antigens. (XLSX) [file pone.0197186.s008.xlsx]

## Sheet: Sheet1
Supplemtary table 1. Details of the 2008 Neisseria meningitidis genomes analysed.
* cbba peptide were annotated by the authors as it was absent from the PUBMLST database
ND, no data; -, not relevant
BIGSdb id	isolate	year	serogroup	strain_designation	clonal complex	gdh allele	cbba allele (NEIS0350)	cbba peptide*	fHbp allele	fHbp peptide	fHbp variant	%Homology peptide 1 (Bexsero®)	%Homology peptide 45 (Trumenba®)	%Homology peptide 55 (Trumenba®)	fhbp IGR allele	CBBA_IGR
18968	M10 240474	2010	B	B: P1.19-1,15-11: F3-9: ST-269	cc269	8	120	4	15	15	1	0.859	-	0.916	4	2
18969	M10 240478	2010	B	B: P1.18-1,3: F1-5: ST-1194	cc41/44	11	10	1	4	4	1	0.96	-	0.861	2	1
19023	M10 240473	2010	B	B: P1.22,9: F5-12: ST-1161	cc269	38	11	3	13	13	1	0.937	-	0.88	3	1
19024	M10 240480	2010	B	B: P1.7-2,4: F1-5: ST-1194	cc41/44	11	10	1	4	4	1	0.96	-	0.861	2	1
19025	M10 240481	2010	B	B: P1.22,9: F3-3: ST-1831	Unassigned	38	30	1	19	19	2	-	0.888	-	1	1
19026	M10 240482	2010	B	B: P1.7-2,4: F5-1: ST-3754	cc41/44	9	160	1	4	4	1	0.96	-	0.861	2	4
19027	M10 240484	2010	B	B: P1.17-1,23: F1-5: ST-1097	cc41/44	9	10	1	19	19	2	-	0.888	-	1	1
19028	M10 240485	2010	B	B: P1.22,9: F5-12: ST-275	cc269	38	11	3	13	13	1	0.937	-	0.88	3	1
19029	M10 240487	2010	B	B: P1.19-1,15-11: F5-1: ST-1049	cc269	8	120	4	15	15	1	0.859	-	0.916	4	2
19030	M10 240489	2010	B	B: P1.19-2,13-1: F3-9: ST-461	cc461	60	127	2	15	15	1	0.859	-	0.916	4	1
19031	M10 240490	2010	B	B: P1.22,9: F5-12: ST-1161	cc269	38	11	3	13	13	1	0.937	-	0.88	3	1
19032	M10 240498	2010	B	B: P1.7-2,4: F1-5: ST-41	cc41/44	9	113	6	4	4	1	0.96	-	0.861	2	1
19958	M10 240476	2010	B	B: P1.22,14: F5-5: ST-9812	cc213	36	55	8	110	110	1	0.98	-	0.88	32	3
19959	M10 240499	2010	B	B: P1.22,9: F5-12: ST-275	cc269	38	30	1	19	19	2	-	0.888	-	1	1
19960	M10 240500	2010	B	B: P1.7-2,4: F1-5: ST-41	cc41/44	9	13	1	14	14	1	0.917	-	0.907	7	1
19961	M10 240502	2010	B	B: P1.7-2,4: F1-5: ST-340	cc41/44	3	3	5	14	14	1	0.917	-	0.907	6	3
19962	M10 240503	2010	Y	Y: P1.5-1,2-2: F1-96: ST-23	cc23	11	35	2	25	25	2	-	0.85	-	1	1
19963	M10 240505	2010	Y	Y: P1.5-1,10-10: F4-1: ST-1655	cc23	11	35	2	25	25	2	-	0.85	-	1	1
19964	M10 240507	2010	Y	Y: P1.21,16-5: &Delta;: ST-183	cc23	11	177	11	104	104	2	-	0.846	-	1	1
19965	M10 240508	2010	B	B: P1.7-2,13-1: F1-7: ST-1575	Unassigned	6	215	1	343	291	1	0.921	-	0.923	20	4
19966	M10 240511	2010	B	B: P1.22,9: F5-12: ST-4713	Unassigned	38	11	3	13	13	1	0.937	-	0.88	3	1
19967	M10 240512	2010	B	B: P1.7-1,1: F1-5: ST-41	cc41/44	9	10	1	4	4	1	0.96	-	0.861	2	1
19968	M10 240514	2010	W	W: P1.5,2: F1-1: ST-11	cc11	8	10	1	22	22	2	-	0.854	-	1	1
19969	M10 240515	2010	B	B: P1.5-1,2-2: F5-1: ST-269	cc269	8	120	4	15	15	1	0.859	-	0.916	4	ND
19970	M10 240520	2010	Y	Y: P1.5-1,10-1: F4-1: ST-1655	cc23	11	35	2	25	25	2	-	0.85	-	1	1
19971	M10 240521	2010	B	B: P1.18-1,30-6: F1-15: ST-3802	cc41/44	3	194	37	704	595	3	-	0.958	-	59	5
19972	M10 240522	2010	B	B: P1.12-1,9: F1-5: ST-41	cc41/44	9	10	1	4	4	1	0.96	-	0.861	2	1
19973	M10 240525	2010	B	B: P1.7,16: F3-3: ST-2931	cc32	6	3	5	1	1	1	1	-	0.861	6	3
19974	M10 240527	2010	B	B: P1.19-1,15-11: F5-1: ST-269	cc269	8	120	4	15	15	1	0.859	-	0.916	4	2
19975	M10 240528	2010	B	B: P1.22,9: F5-12: ST-7833	cc269	38	11	3	13	13	1	0.937	-	0.88	3	1
19976	M10 240530	2010	Y	Y: P1.5-2,10-2: F3-1: ST-9813	cc23	11	177	11	104	104	2	-	0.846	-	1	1
19977	M10 240531	2010	Y	Y: P1.5-1,10-1: F4-1: ST-1655	cc23	11	35	2	25	25	2	-	0.85	-	1	1
19978	M10 240532	2010	B	B: P1.19,15: F1-5: ST-41	cc41/44	9	10	1	4	4	1	0.96	-	0.861	2	1
19979	M10 240534	2010	Y	Y: P1.5-1,10-1: F4-1: ST-1655	cc23	11	35	2	25	25	2	-	0.85	-	1	1
19980	M10 240536	2010	Y	Y: P1.5-1,10-1: F4-1: ST-1655	cc23	11	35	2	25	25	2	-	0.85	-	1	1
19981	M10 240540	2010	Y	Y: P1.5-1,10-10: F4-1: ST-9814	cc23	11	35	2	25	25	2	-	0.85	-	1	1
19982	M10 240546	2010	B	B: P1.22,14: F5-5: ST-213	cc213	36	125	1	65	45	3	-	1	-	11	1
19983	M10 240547	2010	B	B: P1.19,15: F5-1: ST-749	cc32	6	3	5	705	596	3	-	0.923	-	6	3
19984	M10 240548	2010	B	B: P1.7-2,4: F1-5: ST-340	cc41/44	3	195	9	281	14	1	0.917	-	0.907	5	1
19985	M10 240549	2010	B	B: P1.7-2,4: F5-5: ST-41	cc41/44	9	10	1	4	4	1	0.96	-	0.861	2	1
19986	M10 240550	2010	B	B: P1.19,15: F1-5: ST-1163	cc269	3	97	17	706	597	2	-	0.9	-	60	14
19987	M10 240553	2010	B	B: P1.22,9: F5-12: ST-1161	cc269	38	11	3	13	13	1	0.937	-	0.88	3	1
19988	M10 240556	2010	B	B: P1.7-2,4: F5-8: ST-9815	cc41/44	636	13	1	14	14	1	0.917	-	0.907	1	1
19989	M10 240558	2010	B	B: P1.7-2,4: F1-5: ST-1992	cc41/44	3	13	1	14	14	1	0.917	-	0.907	1	1
19990	M10 240559	2010	B	B: P1.22,14: F5-9: ST-162	cc162	26	3	5	1	1	1	1	-	0.861	6	3
19991	M10 240566	2010	B	B: P1.22,14: F5-5: ST-213	cc213	36	1	1	65	45	3	-	1	-	33	1
19992	M10 240568	2010	B	B: P1.22,14: F5-5: ST-213	cc213	36	216	13	15	15	1	0.859	-	0.916	4	9
19993	M10 240569	2010	B	B: P1.22,14: F1-25: ST-18	cc18	10	18	1	36	37	1	0.937	-	0.847	1	1
19994	M10 240570	2010	B	B: P1.7-2,4: F1-5: ST-5357	cc41/44	9	113	6	4	4	1	0.96	-	0.861	2	1
19995	M10 240572	2010	B	B: P1.22,9: F5-12: ST-1161	cc269	38	11	3	13	13	1	0.937	-	0.88	3	1
19996	M10 240578	2010	B	B: P1.19,15: F5-1: ST-34	cc32	5	3	5	707	598	1	0.996	-	0.857	6	3
19997	M10 240579	2010	B	B: P1.22,14-6: F3-27: ST-3687	Unassigned	24	171	38	66	4	1	0.96	-	0.861	1	1
19998	M10 240580	2010	Y	Y: P1.5-1,10-1: F4-1: ST-1655	cc23	11	35	2	25	25	2	-	0.85	-	1	1
19999	M10 240581	2010	NG	NG: P1.12-17,4-1: F3-6: ST-1136	cc1136	22	46	20	91	94	3	-	0.957	-	58	9
20000	M10 240582	2010	B	B: P1.19,15: F5-1: ST-34	cc32	5	3	5	707	598	1	0.996	-	0.857	6	3
20001	M10 240583	2010	B	B: P1.22,9: F4-1: ST-9816	Unassigned	38	11	3	13	13	1	0.937	-	0.88	3	1
20002	M10 240585	2010	B	B: P1.7-1,1: F1-5: ST-46	cc41/44	3	10	1	4	4	1	0.96	-	0.861	2	1
20003	M10 240586	2010	B	B: P1.12-1,16: F1-5: ST-485	cc41/44	8	10	1	4	4	1	0.96	-	0.861	2	1
20004	M10 240587	2010	B	B: P1.17,16-3: F5-13: ST-9879	cc41/44	9	14	11	24	24	2	-	0.854	-	1	1
20005	M10 240589	2010	B	B: P1.7-2,13-9: F1-5: ST-40	cc41/44	9	13	1	14	14	1	0.917	-	0.907	7	1
20006	M10 240590	2010	Y	Y: P1.5-1,10-4: F4-1: ST-23	cc23	11	35	2	25	25	2	-	0.85	-	1	1
20007	M10 240591	2010	B	B: P1.7-1,4-1: F3-9: ST-461	cc461	60	127	2	71	47	3	-	0.961	-	1	1
20008	M10 240592	2010	B	B: P1.7-2,13-2: F4-1: ST-6782	cc41/44	17	13	1	14	14	1	0.917	-	0.907	7	1
20009	M10 240595	2010	B	B: P1.22,14: F5-5: ST-213	cc213	36	217	39	33	31	3	-	0.965	-	9	15
20010	M10 240597	2010	B	B: P1.7-2,4: F1-5: ST-41	cc41/44	9	113	6	4	4	1	0.96	-	0.861	2	1
20011	M10 240598	2010	B	B: P1.7-2,4: F1-88: ST-41	cc41/44	9	196	1	14	14	1	0.917	-	0.907	7	1
20012	M10 240602	2010	B	B: P1.22,9: F5-12: ST-1161	cc269	38	11	3	13	13	1	0.937	-	0.88	3	1
20013	M10 240604	2010	B	B: P1.18-1,14: F1-5: ST-8384	cc41/44	17	10	1	4	4	1	0.96	-	0.861	2	1
20014	M10 240605	2010	B	B: P1.7-1,1: F1-5: ST-41	cc41/44	9	10	1	14	14	1	0.917	-	0.907	1	1
20015	M10 240606	2010	B	B: P1.17-1,23: F5-5: ST-213	cc213	36	29	1	737	621	3	-	0.992	-	1	1
20016	M10 240607	2010	C	C: P1.18-1,3: F3-9: ST-5133	cc103	5	10	1	19	19	2	-	0.888	-	1	2
20017	M10 240611	2010	B	B: P1.19,15: F5-1: ST-749	cc32	6	3	5	1	1	1	1	-	0.861	6	3
20018	M10 240612	2010	B	B: P1.22,14: F5-1: ST-269	cc269	8	120	4	15	15	1	0.859	-	0.916	10	2
20019	M10 240613	2010	B	B: P1.22,9: F5-12: ST-1161	cc269	38	11	3	13	13	1	0.937	-	0.88	3	1
20020	M10 240614	2010	B	B: P1.7-2,13: &Delta;: ST-9817	Unassigned	21	218	2	239	256	1	0.93	-	0.9	34	1
20021	M10 240616	2010	W	W: P1.18-1,3: F4-1: ST-1224	cc22	78	9	2	16	16	2	-	0.881	-	1	1
20022	M10 240617	2010	B	B: P1.22,14: F5-5: ST-213	cc213	36	108	14	33	31	3	-	0.965	-	9	5
20023	M10 240618	2010	E	E: P1.5-1,10-7: F5-36: ST-2435	cc60	3	8	1	13	13	1	0.937	-	0.88	3	1
20024	M10 240619	2010	B	B: P1.22,14: F5-5: ST-213	cc213	36	10	1	4	4	1	0.96	-	0.861	2	1
20025	M10 240621	2010	B	B: P1.22,14: F5-5: ST-213	cc213	36	108	14	33	31	3	-	0.965	-	9	5
20026	M10 240622	2010	B	B: P1.22,9-11: F5-12: ST-9880	Unassigned	38	11	3	13	13	1	0.937	-	0.88	3	1
20027	M10 240623	2010	B	B: P1.22,9: F5-12: ST-1161	cc269	38	219	21	425	357	1	0.855	-	0.935	4	12
20028	M10 240624	2010	B	B: P1.22,9: F5-12: ST-275	cc269	38	11	3	13	13	1	0.937	-	0.88	3	1
20029	M10 240626	2010	B	B: P1.22,9: F5-12: ST-4401	cc269	38	11	3	13	13	1	0.937	-	0.88	3	1
20030	M10 240627	2010	B	B: P1.7,16: F3-3: ST-6083	cc32	6	3	5	1	1	1	1	-	0.861	6	7
20031	M10 240631	2010	C	C: P1.19-1,15-11: F1-7: ST-467	cc269	8	120	4	15	15	1	0.859	-	0.916	4	2
20032	M10 240632	2010	Y	Y: P1.5-1,10-1: F4-1: ST-1655	cc23	11	35	2	25	25	2	-	0.85	-	1	1
20033	M10 240633	2010	Y	Y: P1.5-1,10-10: F4-1: ST-1655	cc23	11	35	2	25	25	2	-	0.85	-	1	1
20034	M10 240634	2010	B	B: P1.7-2,4: F1-5: ST-42	cc41/44	9	13	1	14	14	1	0.917	-	0.907	7	1
20035	M10 240636	2010	B	B: P1.21-7,16: F5-36: ST-1157	cc1157	21	11	3	68	13	1	0.937	-	0.88	3	1
20036	M10 240638	2010	B	B: P1.22,9: F5-12: ST-275	cc269	38	30	1	19	19	2	-	0.888	-	1	1
20037	M10 240639	2010	B	B: P1.19,15: F5-5: ST-284	Unassigned	9	108	14	292	238	1	0.976	-	0.876	21	5
20038	M10 240640	2010	B	B: P1.22,9: F3-3: ST-1831	Unassigned	38	30	1	19	19	2	-	0.888	-	1	1
20039	M10 240641	2010	W	W: P1.18-1,3: F4-1: ST-184	cc22	11	9	2	16	16	2	-	0.881	-	1	1
20040	M10 240642	2010	B	B: P1.22,9: F5-12: ST-5335	Unassigned	38	11	3	13	13	1	0.937	-	0.88	3	1
20041	M10 240643	2010	Y	Y: P1.5-2,10-1: F4-1: ST-23	cc23	11	35	2	25	25	2	-	0.85	-	1	1
20042	M10 240644	2010	Y	Y: P1.5-1,2-2: F5-1: ST-3651	cc22	11	120	4	15	15	1	0.859	-	0.916	4	2
20043	M10 240645	2010	B	B: P1.19-1,15-11: F5-1: ST-283	cc269	8	120	4	15	15	1	0.859	-	0.916	4	2
20044	M10 240649	2010	B	B: P1.22,9: F5-12: ST-275	cc269	38	30	1	19	19	2	-	0.888	-	1	1
20045	M10 240650	2010	B	B: P1.22,9: F5-7: ST-2123	Unassigned	26	113	6	16	16	2	-	0.881	-	56	1
20046	M10 240651	2010	B	B: P1.17,4: F5-5: ST-9881	cc213	36	1	1	65	45	3	-	1	-	8	1
20047	M10 240652	2010	B	B: P1.22,9: F5-12: ST-275	cc269	38	30	1	19	19	2	-	0.888	-	1	1
20048	M10 240657	2010	B	B: P1.22-1,14: F4-1: ST-35	cc35	6	220	13	708	599	2	-	0.893	-	4	4
20049	M10 240659	2010	B	B: P1.7-1,1: F1-14: ST-41	cc41/44	9	197	1	16	16	2	-	0.881	-	1	1
20050	M10 240661	2010	B	B: P1.22,9: F5-12: ST-1161	cc269	38	11	3	13	13	1	0.937	-	0.88	3	1
20051	M10 240662	2010	B	B: P1.22,14: F1-5: ST-9882	cc41/44	9	10	1	4	4	1	0.96	-	0.861	2	1
20052	M10 240665	2010	B	B: P1.22,14-14: F5-5: ST-213	cc213	36	221	40	65	45	3	-	1	-	11	1
20053	M10 240666	2010	W/Y	W/Y: P1.21,16: F3-7: ST-1466	cc174	5	30	1	21	21	2	-	0.854	-	1	1
20054	M10 240668	2010	X	X: P1.22,9: F1-7: ST-9839	Unassigned	3	30	1	19	19	2	-	0.888	-	1	1
20055	M10 240669	2010	B	B: P1.7-2,4: F1-5: ST-1992	cc41/44	3	13	1	14	14	1	0.917	-	0.907	1	1
20056	M10 240670	2010	B	B: P1.19-1,15-11: F3-7: ST-269	cc269	8	120	4	15	15	1	0.859	-	0.916	4	2
20057	M10 240671	2010	W	W: P1.5,2: F1-1: ST-11	cc11	8	10	1	22	22	2	-	0.854	-	1	1
20058	M10 240674	2010	B	B: P1.7-2,4: F1-5: ST-41	cc41/44	9	10	1	4	4	1	0.96	-	0.861	2	1
20059	M10 240675	2010	Y	Y: P1.5-8,10-4: F5-7: ST-168	cc167	9	112	1	72	19	2	-	0.888	-	1	1
20060	M10 240676	2010	B	B: P1.5-1,2-2: F3-6: ST-9828	Unassigned	3	222	13	227	170	3	-	0.931	-	9	1
20061	M10 240677	2010	B	B: P1.7-2,13-1: F1-7: ST-1575	Unassigned	6	215	1	343	291	1	0.921	-	0.923	20	4
20062	M10 240678	2010	B	B: P1.7-2,4: F1-15: ST-340	cc41/44	3	13	1	14	14	1	0.917	-	0.907	1	1
20063	M10 240681	2010	B	B: P1.7-2,13-2: F1-5: ST-9883	cc41/44	650	13	1	14	14	1	0.917	-	0.907	7	1
20064	M10 240682	2010	B	B: P1.19-1,15-11: F5-1: ST-269	cc269	8	120	4	709	600	1	0.844	-	0.92	4	2
20065	M10 240683	2010	B	B: P1.22,9: F5-5: ST-18	cc18	10	18	1	36	37	1	0.937	-	0.847	1	1
20066	M10 240684	2010	B	B: P1.5-1,10-8: F5-13: ST-11	cc11	8	223	16	710	601	1	0.964	-	0.869	5	1
20067	M10 240685	2010	Y	Y: P1.5-1,10-1: F4-1: ST-1655	cc23	11	35	2	25	25	2	-	0.85	-	1	1
20068	M10 240687	2010	B	B: P1.21,16: F1-7: ST-60	cc60	3	8	1	13	13	1	0.937	-	0.88	3	1
20069	M10 240689	2010	B	B: P1.7-2,4: F1-5: ST-154	cc41/44	11	10	1	4	4	1	0.96	-	0.861	2	1
20070	M10 240690	2010	B	B: P1.7-2,4: F1-5: ST-1090	cc41/44	9	10	1	4	4	1	0.96	-	0.861	2	1
20071	M10 240693	2010	B	B: P1.5,2: F1-7: ST-1430	cc60	3	8	1	13	13	1	0.937	-	0.88	3	1
20072	M10 240694	2010	Y	Y: P1.21,16: F3-7: ST-1466	cc174	5	30	1	21	21	2	-	0.854	-	1	1
20073	M10 240698	2010	B	B: P1.5-1,10-1: F3-1: ST-282	cc282	2	47	12	69	84	3	-	0.965	-	13	1
20074	M10 240700	2010	Y	Y: P1.5-1,10-4: F4-1: ST-6463	cc23	11	35	2	25	25	2	-	0.85	-	1	1
20075	M10 240701	2010	B	B: P1.7-2,14: F5-5: ST-213	cc213	36	614	27	97	89	1	0.968	-	0.865	5	5
20076	M10 240702	2010	B	B: P1.7-2,4: F1-5: ST-154	cc41/44	11	10	1	4	4	1	0.96	-	0.861	2	1
20077	M10 240703	2010	B	B: P1.22,14: F5-5: ST-9884	cc213	36	224	2	44	59	3	-	0.961	-	9	1
20078	M10 240704	2010	B	B: P1.19-1,15-11: F5-1: ST-269	cc269	8	120	4	15	15	1	0.859	-	0.916	10	2
20079	M10 240705	2010	C	C: P1.5-1,2-2: F3-9: ST-5133	cc103	5	10	1	19	19	2	-	0.888	-	1	2
20080	M10 240707	2010	B	B: P1.7-2,4: F1-5: ST-1194	cc41/44	11	10	1	4	4	1	0.96	-	0.861	2	1
20081	M10 240708	2010	B	B: P1.7-2,4: F5-1: ST-1195	cc269	8	120	4	15	15	1	0.859	-	0.916	4	2
20082	M10 240709	2010	B	B: P1.19,13-1: F5-1: ST-479	cc269	8	120	4	15	15	1	0.859	-	0.916	4	2
20083	M10 240711	2010	B	B: P1.22,9: F5-12: ST-275	cc269	38	30	1	19	19	2	-	0.888	-	1	1
20084	M10 240712	2010	B	B: P1.22,14: F5-5: ST-213	cc213	36	225	1	65	45	3	-	1	-	8	1
20085	M10 240713	2010	B	B: P1.22,9: F5-12: ST-9829	cc269	38	11	3	13	13	1	0.937	-	0.88	3	1
20086	M10 240716	2010	B	B: P1.19-2,13-1: F3-9: ST-461	cc461	60	127	2	71	47	3	-	0.961	-	1	1
20087	M10 240717	2010	B	B: P1.22,14: F5-5: ST-9830	cc213	619	125	1	65	45	3	-	1	-	61	1
20088	M10 240718	2010	B	B: P1.5,2: F1-7: ST-9885	cc60	3	8	1	13	13	1	0.937	-	0.88	3	1
20089	M10 240719	2010	B	B: P1.19,15: F4-28: ST-34	cc32	5	3	5	1	1	1	1	-	0.861	6	3
20090	M10 240720	2010	B	B: P1.17,13-1: F5-97: ST-479	cc269	8	120	4	15	15	1	0.859	-	0.916	4	2
20091	M10 240721	2010	B	B: P1.5-1,2-2: F5-2: ST-318	cc41/44	9	13	1	14	14	1	0.917	-	0.907	1	1
20092	M10 240722	2010	B	B: P1.7-2,4: F1-5: ST-41	cc41/44	9	13	1	14	14	1	0.917	-	0.907	7	1
20093	M10 240723	2010	B	B: P1.7-2,4: F1-5: ST-41	cc41/44	9	10	1	4	4	1	0.96	-	0.861	2	1
20094	M10 240724	2010	B	B: P1.18-1,3: F1-5: ST-1194	cc41/44	11	10	1	4	4	1	0.96	-	0.861	2	1
20095	M10 240728	2010	B	B: P1.18-1,3: F5-1: ST-9840	cc269	8	120	4	742	622	1	0.843	-	0.899	4	2
20096	M10 240729	2010	B	B: P1.19-1,15-11: F5-1: ST-1049	cc269	8	120	4	15	15	1	0.859	-	0.916	4	2
20097	M10 240730	2010	B	B: P1.7-2,4: F1-5: ST-9886	cc41/44	9	48	10	23	23	2	-	0.858	-	1	1
20098	M10 240731	2010	B	B: P1.22,9: F5-12: ST-9887	Unassigned	38	30	1	19	19	2	-	0.888	-	1	1
20099	M10 240732	2010	Y	Y: P1.5-1,2-2: F5-8: ST-23	cc23	11	35	2	25	25	2	-	0.85	-	1	1
20100	M10 240733	2010	B	B: P1.22,9: F5-12: ST-3934	Unassigned	3	226	8	711	605	1	0.972	-	0.888	26	5
20101	M10 240737	2010	W	W: P1.18-1,3: F4-1: ST-1281	cc22	11	227	41	16	16	2	-	0.881	-	1	1
20102	M10 240742	2010	B	B: P1.22,14: F4-1: ST-8955	cc213	36	228	28	712	603	3	-	0.98	-	27	16
20103	M10 240743	2010	B	B: P1.19-1,15-11: F5-1: ST-269	cc269	8	120	4	15	15	1	0.859	-	0.916	4	2
20104	M10 240745	2010	Y	Y: P1.5-1,10-4: F4-1: ST-1655	cc23	11	35	2	25	25	2	-	0.85	-	1	1
20105	M10 240746	2010	B	B: P1.22,14: F1-5: ST-9841	cc41/44	9	10	1	4	4	1	0.96	-	0.861	2	1
20106	M10 240747	2010	B	B: P1.17-1,23: F3-9: ST-1097	cc41/44	9	10	1	19	19	2	-	0.888	-	1	1
20107	M10 240748	2010	B	B: P1.12-1,16: F1-5: ST-485	cc41/44	8	10	1	4	4	1	0.96	-	0.861	2	1
20108	M10 240749	2010	B	B: P1.12-1,16: F1-5: ST-485	cc41/44	8	10	1	4	4	1	0.96	-	0.861	2	1
20109	M10 240750	2010	B	B: P1.7-2,4: F1-5: ST-8203	cc41/44	9	13	1	14	14	1	0.917	-	0.907	7	1
20110	M10 240751	2010	B	B: P1.22,14: F5-5: ST-213	cc213	36	125	1	65	45	3	-	1	-	8	1
20111	M10 240752	2010	B	B: P1.22,9: F5-12: ST-1161	cc269	38	11	3	13	13	1	0.937	-	0.88	3	1
20112	M10 240753	2010	B	B: P1.22,14-6: F5-1: ST-34	cc32	5	3	5	1	1	1	1	-	0.861	6	3
20113	M10 240754	2010	B	B: P1.7-2,4: F1-5: ST-46	cc41/44	3	10	1	4	4	1	0.96	-	0.861	2	1
20114	M10 240756	2010	W	W: P1.18-1,3: F4-1: ST-2114	cc22	11	9	2	16	16	2	-	0.881	-	1	1
20115	M10 240759	2010	Y	Y: P1.21,16: F3-7: ST-1466	cc174	5	30	1	21	21	2	-	0.854	-	1	1
20116	M10 240761	2010	B	B: P1.7-2,4: F3-4: ST-1938	cc41/44	9	10	1	4	4	1	0.96	-	0.861	2	1
20117	M10 240762	2010	B	B: P1.7-2,4: F1-5: ST-41	cc41/44	9	10	1	4	4	1	0.96	-	0.861	2	1
20118	M10 240763	2010	B	B: P1.21,16: F4-1: ST-4051	Unassigned	26	33	1	4	4	1	0.96	-	0.861	2	1
20119	M10 240766	2010	B	B: P1.21,16: F5-1: ST-479	cc269	8	229	18	588	506	2	-	0.854	-	5	2
20120	M10 240767	2010	B	B: P1.5-2,10: F5-1: ST-34	cc32	5	3	5	1	1	1	1	-	0.861	6	3
20121	M10 240768	2010	B	B: P1.19,15-21: F5-1: ST-2873	cc269	8	120	4	212	160	3	-	0.969	-	10	2
20122	M10 240770	2010	B	B: P1.22,9: F5-1: ST-1195	cc269	8	120	4	15	15	1	0.859	-	0.916	4	2
20123	M10 240771	2010	B	B: P1.5-1,10-1: F3-1: ST-8068	cc282	5	47	12	69	84	3	-	0.965	-	13	1
20124	M10 240772	2010	B	B: P1.22,9: F5-12: ST-1161	cc269	38	11	3	13	13	1	0.937	-	0.88	3	1
20125	M10 240773	2010	B	B: P1.22,14: F1-5: ST-9841	cc41/44	9	10	1	4	4	1	0.96	-	0.861	2	1
20126	M10 240774	2010	B	B: P1.22,9: F5-12: ST-1161	cc269	38	11	3	13	13	1	0.937	-	0.88	3	1
20127	M10 240775	2010	B	B: P1.12-1,9: F1-5: ST-41	cc41/44	9	10	1	4	4	1	0.96	-	0.861	2	1
20128	M10 240776	2010	Y	Y: P1.5-1,10-4: F4-1: ST-1655	cc23	11	35	2	25	25	2	-	0.85	-	1	1
20129	M10 240777	2010	Y	Y: P1.5-1,2-2: F5-8: ST-23	cc23	11	35	2	25	25	2	-	0.85	-	1	1
20130	M10 240778	2010	B	B: P1.22,14: F5-5: ST-9187	cc213	36	230	29	570	494	3	-	0.931	-	12	17
20131	M10 240779	2010	B	B: P1.19-1,15-11: F3-7: ST-269	cc269	8	231	2	15	15	1	0.859	-	0.916	4	1
20132	M10 240781	2010	Y	Y: P1.5-1,2-2: F5-1: ST-3651	cc22	11	35	2	25	25	2	-	0.85	-	1	1
20133	M10 240783	2010	B	B: P1.22,9: F5-12: ST-1161	cc269	38	11	3	13	13	1	0.937	-	0.88	3	1
20134	M10 240785	2010	B	B: P1.7-2,4: F1-5: ST-3447	cc41/44	9	13	1	14	14	1	0.917	-	0.907	7	1
20135	M10 240786	2010	Y	Y: P1.5-1,10-1: F4-1: ST-9831	cc23	30	35	2	25	25	2	-	0.85	-	1	1
20136	M10 240787	2010	Y	Y: P1.5-1,10-10: F4-1: ST-1655	cc23	11	35	2	25	25	2	-	0.85	-	1	1
20137	M10 240788	2010	B	B: P1.7-2,4: F1-5: ST-5981	cc41/44	9	113	6	4	4	1	0.96	-	0.861	2	1
20138	M10 240789	2010	B	B: P1.19-1,30: F5-1: ST-283	cc269	8	120	4	15	15	1	0.859	-	0.916	4	2
20139	M10 240790	2010	B	B: P1.7,16: F3-3: ST-259	cc32	6	3	5	1	1	1	1	-	0.861	6	3
20140	M10 240793	2010	B	B: P1.7-2,13-2: F4-1: ST-6782	cc41/44	17	13	1	14	14	1	0.917	-	0.907	7	1
20141	M10 240794	2010	B	B: P1.7-2,16: F3-3: ST-32	cc32	6	3	5	1	1	1	1	-	0.861	6	3
20142	M10 240796	2010	B	B: P1.19,15: F3-7: ST-136	cc41/44	9	115	22	193	202	2	-	0.862	-	1	1
20143	M10 240798	2010	Y	Y: P1.5-1,10-1: F4-1: ST-1655	cc23	11	35	2	25	25	2	-	0.85	-	1	1
20144	M10 240799	2010	B	B: P1.22,14: F5-5: ST-213	cc213	36	125	1	65	45	3	-	1	-	62	1
20145	M10 240803	2010	B	B: P1.7-2,4: F1-5: ST-1194	cc41/44	11	10	1	4	4	1	0.96	-	0.861	2	1
20146	M10 240804	2010	Y	Y: P1.5-1,10-1: F4-1: ST-1655	cc23	11	35	2	25	25	2	-	0.85	-	1	1
20147	M10 240805	2010	B	B: P1.22,9: F5-12: ST-4713	Unassigned	38	11	3	13	13	1	0.937	-	0.88	3	1
20148	M10 240807	2010	B	B: P1.12-1,9: F1-5: ST-41	cc41/44	9	10	1	4	4	1	0.96	-	0.861	2	1
20149	M10 240808	2010	B	B: P1.7-2,30: F5-1: ST-1092	cc269	8	120	4	15	15	1	0.859	-	0.916	4	2
20150	M10 240809	2010	B	B: P1.7-2,4: F1-5: ST-41	cc41/44	9	10	1	4	4	1	0.96	-	0.861	2	1
20151	M10 240810	2010	B	B: P1.7-2,4: F5-9: ST-162	cc162	26	30	1	21	21	2	-	0.854	-	1	1
20152	M10 240811	2010	B	B: P1.7-1,1: F5-36: ST-9888	cc1157	21	11	3	68	13	1	0.937	-	0.88	3	1
20153	M10 240814	2010	B	B: P1.22,9: F5-12: ST-1161	cc269	38	10	1	4	4	1	0.96	-	0.861	2	1
20154	M10 240817	2010	W	W: P1.5,2: F1-1: ST-11	cc11	8	10	1	22	22	2	-	0.854	-	1	1
20155	M10 240818	2010	C	C: P1.5-1,10-8: F3-6: ST-11	cc11	8	105	7	361	306	1	0.964	-	0.869	5	1
20156	M10 240819	2010	B	B: P1.22,9: F5-12: ST-1163	cc269	3	30	1	19	19	2	-	0.888	-	1	1
20157	M10 240820	2010	B	B: P1.7-2,4: F3-3: ST-41	cc41/44	9	10	1	4	4	1	0.96	-	0.861	2	6
20158	M10 240821	2010	W	W: P1.5,2: F1-1: ST-11	cc11	8	10	1	22	22	2	-	0.854	-	1	1
20159	M10 240822	2010	W	W: P1.5,2: F4-1: ST-1224	cc22	78	9	2	16	16	2	-	0.881	-	1	1
20160	M10 240823	2010	B	B: P1.17-1,23-6: F1-5: ST-1097	cc41/44	9	10	1	19	19	2	-	0.888	-	1	1
20161	M10 240824	2010	B	B: P1.7,16: F3-3: ST-32	cc32	6	3	5	1	1	1	1	-	0.861	6	7
20162	M10 240825	2010	B	B: P1.21,16: F5-8: ST-9818	cc60	3	8	1	13	13	1	0.937	-	0.88	3	1
20163	M10 240826	2010	B	B: P1.22,9: F5-12: ST-7789	cc269	6	11	3	13	13	1	0.937	-	0.88	3	1
20164	M11 240000	2011	Y	Y: P1.5-1,10-4: F4-1: ST-23	cc23	11	13	1	14	14	1	0.917	-	0.907	1	1
20165	M11 240001	2011	B	B: P1.19-2,13-1: F3-9: ST-1946	cc461	192	11	3	68	13	1	0.937	-	0.88	3	1
20166	M11 240002	2011	B	B: P1.19,15-1: F5-2: ST-4954	Unassigned	6	37	1	14	14	1	0.917	-	0.907	1	1
20167	M11 240003	2011	B	B: P1.17-1,23: F3-3: ST-9889	cc41/44	9	198	1	713	8	1	0.937	-	0.876	21	1
20168	M11 240004	2011	B	B: P1.22,9: F5-12: ST-1161	cc269	38	11	3	13	13	1	0.937	-	0.88	3	1
20169	M11 240005	2011	Y	Y: P1.5-1,2-2: F5-8: ST-23	cc23	11	35	2	25	25	2	-	0.85	-	1	1
20170	M11 240006	2011	B	B: P1.19,15: F5-1: ST-8049	cc32	6	3	5	1	1	1	1	-	0.861	6	3
20171	M11 240007	2011	Y	Y: P1.5-1,10-10: F4-1: ST-1655	cc23	11	35	2	25	25	2	-	0.85	-	1	ND
20172	M11 240008	2011	B	B: P1.7-2,4: F1-5: ST-2783	cc41/44	3	199	8	714	605	1	0.972	-	0.888	6	1
20173	M11 240010	2011	B	B: P1.19-1,26: F5-1: ST-269	cc269	8	120	4	15	15	1	0.859	-	0.916	4	2
20174	M11 240011	2011	B	B: P1.7-2,4: F1-5: ST-42	cc41/44	9	13	1	14	14	1	0.917	-	0.907	7	1
20175	M11 240012	2011	B	B: P1.7-2,4: F1-5: ST-154	cc41/44	11	10	1	4	4	1	0.96	-	0.861	2	1
20176	M11 240013	2011	B	B: P1.21,16-15: F3-3: ST-9890	cc32	6	232	19	593	510	1	0.893	-	0.897	28	8
20177	M11 240014	2011	B	B: P1.19-2,13-7: F3-9: ST-9891	cc461	17	127	2	71	47	3	-	0.961	-	1	1
20178	M11 240015	2011	B	B: P1.22,9: F1-7: ST-1159	Unassigned	38	13	1	14	14	1	0.917	-	0.907	1	1
20179	M11 240016	2011	B	B: P1.7,16: F3-3: ST-1096	cc32	6	343	8	48	62	1	0.945	-	0.88	35	18
20180	M11 240017	2011	B	B: P1.7-2,4: F1-5: ST-9819	cc41/44	3	195	9	281	14	1	0.917	-	0.907	5	1
20181	M11 240018	2011	B	B: P1.18-1,30: F5-8: ST-9820	cc41/44	9	10	1	4	4	1	0.96	-	0.861	2	1
20182	M11 240019	2011	B	B: P1.22-1,14: F4-1: ST-8063	cc35	6	233	1	16	16	2	-	0.881	-	1	4
20183	M11 240021	2011	B	B: P1.7,16: F3-3: ST-259	cc32	6	3	5	1	1	1	1	-	0.861	6	3
20184	M11 240022	2011	B	B: P1.22,9: F5-12: ST-1161	cc269	38	11	3	13	13	1	0.937	-	0.88	3	1
20185	M11 240023	2011	B	B: P1.17-1,23-2: F1-18: ST-41	cc41/44	9	10	1	4	4	1	0.96	-	0.861	2	1
20186	M11 240024	2011	B	B: P1.17-1,23: F5-2: ST-1097	cc41/44	9	10	1	19	19	2	-	0.888	-	1	1
20187	M11 240025	2011	B	B: P1.19-1,15-11: F5-1: ST-1049	cc269	8	120	4	15	15	1	0.859	-	0.916	4	2
20188	M11 240026	2011	B	B: P1.19-1,15-11: F5-1: ST-1049	cc269	8	120	4	15	15	1	0.859	-	0.916	4	2
20189	M11 240027	2011	B	B: P1.21,16: F5-12: ST-60	cc60	3	8	1	13	13	1	0.937	-	0.88	3	1
20190	M11 240028	2011	B	B: P1.21,16: F5-8: ST-60	cc60	3	8	1	13	13	1	0.937	-	0.88	3	1
20191	M11 240029	2011	W	W: P1.18-1,3: F4-1: ST-1286	cc22	11	234	11	74	16	2	-	0.881	-	22	1
20192	M11 240030	2011	B	B: P1.5-1,2-2: F5-1: ST-269	cc269	8	120	4	15	15	1	0.859	-	0.916	4	2
20193	M11 240031	2011	Y	Y: P1.5-1,10-1: F4-1: ST-1655	cc23	11	35	2	25	25	2	-	0.85	-	1	1
20194	M11 240032	2011	B	B: P1.22,9: F5-12: ST-5849	Unassigned	38	11	3	13	13	1	0.937	-	0.88	3	1
20195	M11 240034	2011	B	B: P1.7-2,4: F1-5: ST-5861	cc41/44	3	120	4	73	86	1	0.84	-	0.923	4	2
20196	M11 240035	2011	W	W: P1.5,2: F1-1: ST-11	cc11	8	10	1	22	22	2	-	0.854	-	1	1
20197	M11 240036	2011	Y	Y: P1.7-2,10-1: F4-1: ST-1655	cc23	11	35	2	25	25	2	-	0.85	-	1	1
20198	M11 240037	2011	B	B: P1.19,15: F4-28: ST-34	cc32	5	3	5	1	1	1	1	-	0.861	6	3
20199	M11 240038	2011	Y	Y: P1.5-8,10-4: F5-2: ST-168	cc167	9	112	1	72	19	2	-	0.888	-	1	1
20200	M11 240039	2011	B	B: P1.5-1,10-1: F3-35: ST-1802	cc282	6	344	8	7	7	1	0.949	-	0.884	63	5
20201	M11 240040	2011	B	B: P1.18-1,3: F1-18: ST-1196	cc41/44	11	10	1	4	4	1	0.96	-	0.861	2	1
20202	M11 240041	2011	B	B: P1.7-2,4: F1-5: ST-477	cc41/44	9	200	1	4	4	1	0.96	-	0.861	2	1
20203	M11 240042	2011	B	B: P1.19-2,13: F3-9: ST-1946	cc461	192	127	2	71	47	3	-	0.961	-	1	1
20204	M11 240043	2011	Y	Y: P1.5-1,10-1: F4-1: ST-9842	cc23	11	35	2	25	25	2	-	0.85	-	1	1
20205	M11 240044	2011	B	B: P1.22,9: F5-1: ST-9843	cc269	8	120	4	15	15	1	0.859	-	0.916	4	2
20206	M11 240045	2011	B	B: P1.5-1,2-2: F5-16: ST-858	cc18	10	18	1	36	37	1	0.937	-	0.847	1	1
20207	M11 240046	2011	B	B: P1.22,14: F5-5: ST-213	cc213	36	125	1	322	275	1	0.915	-	0.919	64	1
20208	M11 240047	2011	B	B: P1.7-2,4: F1-5: ST-41	cc41/44	9	113	6	4	4	1	0.96	-	0.861	2	1
20209	M11 240048	2011	B	B: P1.5,2: F1-5: ST-60	cc60	3	8	1	13	13	1	0.937	-	0.88	3	1
20210	M11 240050	2011	B	B: P1.19,15: F5-1: ST-213	cc213	36	125	1	65	45	3	-	1	-	8	1
20211	M11 240052	2011	B	B: P1.19-2,13-1: F5-5: ST-461	cc461	60	9	2	71	47	3	-	0.961	-	1	1
20212	M11 240053	2011	B	B: P1.7-2,4: F1-5: ST-41	cc41/44	9	13	1	14	14	1	0.917	-	0.907	7	1
20213	M11 240054	2011	B	B: P1.7-2,4: F1-5: ST-41	cc41/44	9	10	1	4	4	1	0.96	-	0.861	2	1
20214	M11 240055	2011	B	B: P1.17-1,23-2: F1-18: ST-41	cc41/44	9	10	1	4	4	1	0.96	-	0.861	2	1
20215	M11 240056	2011	B	B: P1.5-1,10-8: F5-13: ST-11	cc11	8	223	16	715	606	1	0.929	-	0.873	5	1
20216	M11 240057	2011	W	W: P1.5,2: F1-1: ST-11	cc11	8	10	1	22	22	2	-	0.854	-	1	1
20217	M11 240058	2011	B	B: P1.22,9: F5-12: ST-275	cc269	38	235	1	13	13	1	0.937	-	0.88	3	10
20218	M11 240059	2011	B	B: P1.7-2,4: F1-5: ST-9832	cc41/44	9	10	1	4	4	1	0.96	-	0.861	2	1
20219	M11 240060	2011	B	B: P1.21-2,28: F5-2: ST-2380	cc35	6	105	7	92	95	2	-	0.854	-	5	1
20220	M11 240061	2011	B	B: P1.22,14: F1-7: ST-9833	cc213	3	236	42	377	318	1	0.945	-	0.876	36	5
20221	M11 240062	2011	B	B: P1.22,9: F5-12: ST-275	cc269	38	30	1	19	19	2	-	0.888	-	1	1
20222	M11 240063	2011	B	B: P1.7-2,4: F1-5: ST-41	cc41/44	9	9	2	4	4	1	0.96	-	0.861	2	1
20223	M11 240064	2011	Y	Y: P1.ND,ND: F3-4: ST-7786	Unassigned	11	9	2	16	16	2	-	0.881	-	1	1
20224	M11 240065	2011	Y	Y: P1.5-1,10-1: F4-1: ST-1655	cc23	11	35	2	25	25	2	-	0.85	-	1	1
20225	M11 240066	2011	B	B: P1.22,9: F5-12: ST-275	cc269	38	11	3	13	13	1	0.937	-	0.88	3	1
20226	M11 240067	2011	W	W: P1.5,2: F1-1: ST-11	cc11	8	10	1	22	22	2	-	0.854	-	1	1
20227	M11 240068	2011	NG	NG: P1.21,16: F1-5: ST-9844	Unassigned	21	30	1	136	119	2	-	0.885	-	1	1
20228	M11 240069	2011	B	B: P1.22-1,14: F4-1: ST-35	cc35	6	2	1	4	4	1	0.96	-	0.861	2	1
20229	M11 240070	2011	B	B: P1.19-1,15-11: F5-1: ST-269	cc269	8	120	4	15	15	1	0.859	-	0.916	4	2
20230	M11 240071	2011	Y	Y: P1.5-1,10-1: F5-5: ST-767	cc167	16	48	10	23	23	2	-	0.858	-	1	1
20231	M11 240072	2011	B	B: P1.22,9: F5-12: ST-275	cc269	38	30	1	19	19	2	-	0.888	-	1	1
20232	M11 240073	2011	Y	Y: P1.22,9: F3-7: ST-1466	cc174	5	30	1	21	21	2	-	0.854	-	1	1
20233	M11 240074	2011	B	B: P1.22,14: F5-5: ST-213	cc213	36	1	1	65	45	3	-	1	-	8	1
20234	M11 240076	2011	C	C: P1.5,2: F3-3: ST-11	cc11	8	1	1	22	22	2	-	0.854	-	1	1
20235	M11 240077	2011	B	B: P1.19-1,15-11: F1-7: ST-269	cc269	8	120	4	15	15	1	0.859	-	0.916	4	2
20236	M11 240079	2011	B	B: P1.7-2,4: F1-5: ST-41	cc41/44	9	113	6	4	4	1	0.96	-	0.861	2	1
20237	M11 240081	2011	B	B: P1.18-1,14: F1-5: ST-1194	cc41/44	11	10	1	4	4	1	0.96	-	0.861	2	1
20238	M11 240082	2011	B	B: P1.12-6,13-4: F5-1: ST-290	cc32	1	3	5	1	1	1	1	-	0.861	6	3
20239	M11 240083	2011	B	B: P1.19-2,13-1: F5-5: ST-461	cc461	60	9	2	71	47	3	-	0.961	-	1	1
20240	M11 240084	2011	B	B: P1.22,14: F3-6: ST-4997	cc18	10	18	1	36	37	1	0.937	-	0.847	65	1
20241	M11 240085	2011	B	B: P1.7-2,4: F1-5: ST-340	cc41/44	3	13	1	14	14	1	0.917	-	0.907	1	1
20242	M11 240086	2011	B	B: P1.17,16-3: F5-1: ST-1774	cc269	14	120	4	149	143	3	-	0.965	-	4	2
20243	M11 240088	2011	B	B: P1.12-1,16: F1-5: ST-485	cc41/44	8	10	1	4	4	1	0.96	-	0.861	2	1
20244	M11 240094	2011	C	C: P1.ND,ND: F3-9: ST-5133	cc103	5	10	1	19	19	2	-	0.888	-	1	2
20245	M11 240096	2011	Y	Y: P1.5-1,10-1: F4-1: ST-1655	cc23	11	35	2	25	25	2	-	0.85	-	1	1
20246	M11 240097	2011	B	B: P1.7-2,4: F1-5: ST-2799	cc41/44	9	30	1	4	4	1	0.96	-	0.861	2	1
20247	M11 240099	2011	W	W: P1.5,2: F1-1: ST-11	cc11	8	10	1	22	22	2	-	0.854	-	1	1
20248	M11 240100	2011	B	B: P1.19,15: F3-9: ST-9239	cc103	5	35	2	25	25	2	-	0.85	-	1	1
20249	M11 240108	2011	B	B: P1.7-4,1: F1-5: ST-2632	cc41/44	3	201	9	281	14	1	0.917	-	0.907	5	1
20250	M11 240109	2011	B	B: P1.7,16-26: F1-62: ST-2931	cc32	6	30	1	743	0	2	-	-	-	1	1
20251	M11 240110	2011	B	B: P1.7-2,4: F1-5: ST-1194	cc41/44	11	10	1	4	4	1	0.96	-	0.861	2	1
20252	M11 240111	2011	B	B: P1.22-28,14: F5-5: ST-213	cc213	36	202	15	30	30	3	-	0.931	-	17	1
20253	M11 240112	2011	B	B: P1.7-2,13-9: F1-25: ST-8052	cc41/44	9	13	1	14	14	1	0.917	-	0.907	7	1
20254	M11 240113	2011	B	B: P1.22,14: F5-5: ST-2666	cc213	36	125	1	65	45	3	-	1	-	8	1
20255	M11 240115	2011	B	B: P1.7-2,4: F1-5: ST-5981	cc41/44	9	113	6	4	4	1	0.96	-	0.861	2	1
20256	M11 240116	2011	Y	Y: P1.5-1,10-1: F4-1: ST-1655	cc23	11	35	2	25	25	2	-	0.85	-	1	1
20257	M11 240117	2011	B	B: P1.21,16: F1-7: ST-9821	cc60	3	105	7	134	118	2	-	0.888	-	5	1
20258	M11 240119	2011	B	B: P1.22-1,14: F5-2: ST-437	cc41/44	9	202	15	30	30	3	-	0.931	-	17	11
20259	M11 240121	2011	B	B: P1.22,14: F5-36: ST-213	cc213	36	108	14	33	31	3	-	0.965	-	9	5
20260	M11 240122	2011	B	B: P1.22,9: F5-12: ST-4713	Unassigned	38	11	3	68	13	1	0.937	-	0.88	3	1
20261	M11 240123	2011	B	B: P1.5-1,2-2: F5-8: ST-3537	cc11	8	1	1	22	22	2	-	0.854	-	1	1
20263	M11 240125	2011	B	B: P1.7-2,4: F1-47: ST-3818	cc41/44	11	10	1	4	4	1	0.96	-	0.861	2	1
20264	M11 240126	2011	Y	Y: P1.5-1,10-4: F4-1: ST-23	cc23	11	35	2	25	25	2	-	0.85	-	1	1
20265	M11 240128	2011	B	B: P1.22,9: F5-12: ST-4713	Unassigned	38	11	3	13	13	1	0.937	-	0.88	3	1
20266	M11 240129	2011	B	B: P1.5-1,10-1: F3-1: ST-282	cc282	2	47	12	69	84	3	-	0.965	-	13	1
20267	M11 240131	2011	B	B: P1.7-2,9: F5-9: ST-162	cc162	26	30	1	21	21	2	-	0.854	-	1	1
20268	M11 240132	2011	B	B: P1.19-1,15-11: F3-7: ST-269	cc269	8	231	2	15	15	1	0.859	-	0.916	4	1
20269	M11 240133	2011	B	B: P1.22,14: F3-6: ST-18	cc18	10	18	1	36	37	1	0.937	-	0.847	1	1
20270	M11 240134	2011	B	B: P1.22,14: F5-5: ST-213	cc213	36	1	1	65	45	3	-	1	-	8	1
20271	M11 240137	2011	B	B: P1.22,14: F5-5: ST-213	cc213	36	125	1	65	45	3	-	1	-	33	1
20272	M11 240139	2011	B	B: P1.22,9: F5-12: ST-1161	cc269	38	11	3	13	13	1	0.937	-	0.88	3	1
20273	M11 240145	2011	B	B: P1.21,16: F1-7: ST-2080	cc41/44	9	203	6	19	19	2	-	0.888	-	1	1
20274	M11 240146	2011	B	B: P1.22,9: F5-12: ST-275	cc269	38	30	1	19	19	2	-	0.888	-	1	1
20275	M11 240147	2011	B	B: P1.22,14: F5-5: ST-213	cc213	36	125	1	65	45	3	-	1	-	8	1
20276	M11 240148	2011	B	B: P1.7-2,4: F1-5: ST-41	cc41/44	9	113	6	4	4	1	0.96	-	0.861	2	1
20277	M11 240149	2011	B	B: P1.7-2,4: F1-5: ST-2314	cc41/44	9	10	1	4	4	1	0.96	-	0.861	2	1
20278	M11 240150	2011	B	B: P1.5-1,2-2: F5-1: ST-7939	cc269	3	120	4	15	15	1	0.859	-	0.916	4	2
20279	M11 240151	2011	B	B: P1.19,13-1: F5-97: ST-479	cc269	8	120	4	15	15	1	0.859	-	0.916	4	2
20280	M11 240152	2011	B	B: P1.7-2,4: F4-3: ST-1475	cc41/44	9	13	1	14	14	1	0.917	-	0.907	1	1
20281	M11 240157	2011	Y	Y: P1.5-1,10-1: F4-1: ST-10138	cc23	11	35	2	25	25	2	-	0.85	-	1	1
20282	M11 240161	2011	Y	Y: P1.21,16: F3-7: ST-1466	cc174	5	237	8	277	226	1	0.892	-	0.926	66	1
20283	M11 240163	2011	B	B: P1.17-1,23: F5-1: ST-327	cc41/44	9	10	1	19	19	2	-	0.888	-	1	1
20284	M11 240164	2011	B	B: P1.7-2,4: F1-5: ST-5861	cc41/44	3	120	4	73	86	1	0.84	-	0.923	4	2
20285	M11 240165	2011	Y	Y: P1.21,16: F3-7: ST-1466	cc174	5	30	1	240	254	1	0.934	-	0.9	1	1
20286	M11 240166	2011	Y	Y: P1.5-2,10-1: F4-1: ST-23	cc23	11	35	2	25	25	2	-	0.85	-	1	1
20287	M11 240167	2011	B	B: P1.21,16: F1-7: ST-9327	cc60	3	8	1	13	13	1	0.937	-	0.88	3	1
20288	M11 240168	2011	W	W: P1.5,2: F1-1: ST-11	cc11	8	10	1	22	22	2	-	0.854	-	1	1
20289	M11 240170	2011	B	B: P1.7-2,4: F1-5: ST-10139	cc41/44	3	195	9	281	14	1	0.917	-	0.907	5	1
20290	M11 240173	2011	B	B: P1.7-2,4: F1-5: ST-5981	cc41/44	9	113	6	4	4	1	0.96	-	0.861	2	1
20291	M11 240174	2011	B	B: P1.22-1,14: F4-1: ST-35	cc35	6	29	1	16	16	2	-	0.881	-	1	4
20292	M11 240175	2011	B	B: P1.19,15: F5-1: ST-33	cc32	6	3	5	1	1	1	1	-	0.861	6	3
20293	M11 240176	2011	B	B: P1.19-3,15: F1-7: ST-3138	Unassigned	5	125	1	716	607	1	0.922	-	0.9	67	1
20294	M11 240180	2011	B	B: P1.19-1,15-11: F5-1: ST-1049	cc269	8	120	4	15	15	1	0.859	-	0.916	4	2
20295	M11 240181	2011	B	B: P1.22,14: F5-5: ST-213	cc213	36	238	9	205	187	3	-	0.98	-	5	1
20296	M11 240182	2011	B	B: P1.19,15: F5-1: ST-9834	Unassigned	6	3	5	1	1	1	1	-	0.861	6	3
20297	M11 240183	2011	B	B: P1.7,16: F5-2: ST-32	cc32	6	37	1	84	49	2	-	0.881	-	1	1
20298	M11 240185	2011	B	B: P1.19-1,15-11: F5-1: ST-1049	cc269	8	239	4	717	15	1	0.859	-	0.916	4	2
20299	M11 240188	2011	B	B: P1.22,14: F1-5: ST-41	cc41/44	9	10	1	4	4	1	0.96	-	0.861	2	1
20300	M11 240189	2011	B	B: P1.5-1,10-1: F3-1: ST-8068	cc282	5	47	12	69	84	3	-	0.965	-	13	1
20301	M11 240191	2011	B	B: P1.5-1,10-4: F1-5: ST-9892	cc41/44	8	204	1	4	4	1	0.96	-	0.861	2	1
20302	M11 240192	2011	Y	Y: P1.5-1,10-1: F4-1: ST-1655	cc23	11	35	2	25	25	2	-	0.85	-	1	1
20303	M11 240193	2011	B	B: P1.17-1,23: F1-5: ST-1097	cc41/44	9	120	4	562	486	2	-	0.896	-	4	2
20304	M11 240195	2011	B	B: P1.7-2,4: F3-5: ST-1475	cc41/44	9	13	1	14	14	1	0.917	-	0.907	1	1
20305	M11 240203	2011	B	B: P1.7-2,4: F1-5: ST-340	cc41/44	3	13	1	14	14	1	0.917	-	0.907	1	1
20306	M11 240206	2011	B	B: P1.19-2,13-1: F5-5: ST-461	cc461	60	9	2	71	47	3	-	0.961	-	1	1
20307	M11 240207	2011	C	C: P1.21,16: F1-15: ST-839	cc41/44	9	10	1	19	19	2	-	0.888	-	1	2
20308	M11 240209	2011	Y	Y: P1.21,16: F3-7: ST-1466	cc174	5	30	1	21	21	2	-	0.854	-	1	1
20309	M11 240210	2011	Y	Y: P1.5-1,2-2: F5-8: ST-23	cc23	11	35	2	25	25	2	-	0.85	-	1	1
20310	M11 240211	2011	Y	Y: P1.21,10-46: F3-7: ST-9893	cc174	5	30	1	21	21	2	-	0.854	-	1	1
20311	M11 240212	2011	B	B: P1.22,9: F5-12: ST-275	cc269	38	30	1	19	19	2	-	0.888	-	68	1
20312	M11 240213	2011	B	B: P1.18-1,14: F1-5: ST-1194	cc41/44	11	10	1	4	4	1	0.96	-	0.861	2	1
20313	M11 240214	2011	B	B: P1.19-2,13-1: F3-9: ST-1946	cc461	192	127	2	71	47	3	-	0.961	-	1	1
20314	M11 240215	2011	Y	Y: P1.5-1,10-1: F4-1: ST-1655	cc23	11	35	2	25	25	2	-	0.85	-	1	1
20315	M11 240216	2011	Y	Y: P1.5-1,10-1: F4-1: ST-1655	cc23	11	35	2	25	25	2	-	0.85	-	1	1
20316	M11 240226	2011	B	B: P1.19-1,15-11: F5-1: ST-269	cc269	8	120	4	15	15	1	0.859	-	0.916	4	2
20317	M11 240227	2011	Y	Y: P1.5-1,10-4: F4-1: ST-6463	cc23	11	35	2	25	25	2	-	0.85	-	1	1
20318	M11 240231	2011	W	W: P1.18-1,16: F4-1: ST-184	cc22	11	9	2	16	16	2	-	0.881	-	1	1
20319	M11 240232	2011	B	B: P1.22-1,14: F4-1: ST-35	cc35	6	2	1	4	4	1	0.96	-	0.861	2	1
20320	M11 240233	2011	NG	NG: P1.18-1,3: F1-23: ST-9835	cc226	8	48	10	718	609	2	-	0.877	-	1	1
20321	M11 240234	2011	C	C: P1.7-1,1: F1-5: ST-5238	Unassigned	21	125	1	1	1	1	1	-	0.861	6	1
20322	M11 240236	2011	B	B: P1.22,9: F5-12: ST-1161	cc269	38	11	3	13	13	1	0.937	-	0.88	3	1
20323	M11 240237	2011	B	B: P1.7-2,4: F1-5: ST-3482	Unassigned	6	240	1	19	19	2	-	0.888	-	1	1
20324	M11 240241	2011	B	B: P1.18-1,3: F1-5: ST-1194	cc41/44	11	10	1	4	4	1	0.96	-	0.861	2	1
20325	M11 240242	2011	B	B: P1.18-1,3: F1-5: ST-1194	cc41/44	11	10	1	4	4	1	0.96	-	0.861	2	1
20326	M11 240243	2011	B	B: P1.22,9: F1-7: ST-9845	?	38	11	3	13	13	1	0.937	-	0.88	3	1
20327	M11 240244	2011	B	B: P1.7-2,13-2: F1-5: ST-1960	cc41/44	9	13	1	14	14	1	0.917	-	0.907	7	1
20328	M11 240246	2011	NG	NG: P1.5,2: F1-7: ST-60	cc60	3	8	1	13	13	1	0.937	-	0.88	3	1
20329	M11 240247	2011	C	C: P1.5-1,10-8: F3-6: ST-11	cc11	8	105	7	669	0	1	-	-	-	5	1
20330	M11 240248	2011	B	B: P1.18-1,3: F1-5: ST-1194	cc41/44	11	10	1	4	4	1	0.96	-	0.861	2	1
20331	M11 240249	2011	B	B: P1.21,16: F1-7: ST-8944	Unassigned	3	241	4	16	16	2	-	0.881	-	1	1
20332	M11 240251	2011	B	B: P1.19-1,15-11: F4-1: ST-269	cc269	8	120	4	15	15	1	0.859	-	0.916	4	2
20333	M11 240255	2011	B	B: P1.7-2,4: F1-5: ST-1090	cc41/44	9	10	1	4	4	1	0.96	-	0.861	2	1
20334	M11 240256	2011	B	B: P1.7-2,4: F1-5: ST-9822	cc41/44	36	10	1	4	4	1	0.96	-	0.861	2	1
20335	M11 240258	2011	Y	Y: P1.5-1,2-2: F5-8: ST-23	cc23	11	35	2	25	25	2	-	0.85	-	1	1
20336	M11 240259	2011	B	B: P1.7-2,4: F1-5: ST-41	cc41/44	9	9	2	4	4	1	0.96	-	0.861	2	1
20337	M11 240261	2011	W	W: P1.18-1,3: F3-9: ST-184	cc22	11	9	2	16	16	2	-	0.881	-	1	1
20338	M11 240262	2011	A	A: P1.20,9: F3-1: ST-4789	cc5	3	2	1	719	94	3	-	0.957	-	37	1
20339	M11 240263	2011	Y	Y: P1.5-1,10-1: F4-1: ST-1655	cc23	11	35	2	25	25	2	-	0.85	-	1	1
20340	M11 240265	2011	B	B: P1.19-1,15-11: F5-1: ST-9836	cc269	8	120	4	15	15	1	0.859	-	0.916	4	2
20341	M11 240266	2011	B	B: P1.22,14: F5-5: ST-213	cc213	36	302	15	720	611	3	-	0.98	-	9	5
20342	M11 240268	2011	B	B: P1.22,14: F5-5: ST-213	cc213	36	10	1	4	4	1	0.96	-	0.861	2	1
20343	M11 240269	2011	B	B: P1.7-2,4: F1-5: ST-1090	cc41/44	9	10	1	4	4	1	0.96	-	0.861	2	1
20344	M11 240275	2011	B	B: P1.19-1,15: F5-1: ST-269	cc269	8	120	4	15	15	1	0.859	-	0.916	4	2
20345	M11 240276	2011	B	B: P1.7-2,4: F3-3: ST-41	cc41/44	9	10	1	4	4	1	0.96	-	0.861	2	6
20346	M11 240277	2011	Y	Y: P1.5-1,10-1: F4-1: ST-1655	cc23	11	35	2	25	25	2	-	0.85	-	1	1
20347	M11 240278	2011	Y	Y: P1.7-2,30-4: F4-1: ST-1655	cc23	11	35	2	25	25	2	-	0.85	-	1	1
20348	M11 240280	2011	B	B: P1.7-2,13: F4-1: ST-278	cc35	6	29	1	24	24	2	-	0.854	-	1	4
20349	M11 240281	2011	B	B: P1.22,9: F5-12: ST-275	cc269	38	120	4	15	15	1	0.859	-	0.916	4	2
20350	M11 240282	2011	B	B: P1.22,14: F5-5: ST-213	cc213	36	108	14	33	31	3	-	0.965	-	69	5
20351	M11 240283	2011	Y	Y: P1.5-2,10-1: F4-1: ST-23	cc23	11	35	2	25	25	2	-	0.85	-	1	1
20352	M11 240284	2011	B	B: P1.22,9: F5-12: ST-1161	cc269	38	11	3	13	13	1	0.937	-	0.88	3	1
20353	M11 240285	2011	B	B: P1.5-1,10-4: F5-1: ST-33	cc32	6	111	1	151	144	1	0.996	-	0.857	1	4
20354	M11 240286	2011	B	B: P1.5,2: F3-6: ST-9894	Unassigned	26	33	1	4	4	1	0.96	-	0.861	2	1
20355	M11 240287	2011	B	B: P1.5-2,10-1: F4-1: ST-9846	cc865	8	144	43	690	584	2	-	0.9	-	38	1
20356	M11 240289	2011	B	B: P1.7-2,4: F1-5: ST-340	cc41/44	3	195	9	281	14	1	0.917	-	0.907	5	1
20357	M11 240290	2011	B	B: P1.22,14: F5-5: ST-9895	cc213	36	125	1	91	94	3	-	0.957	-	8	1
20358	M11 240291	2011	B	B: P1.7-1,1: F1-5: ST-2363	cc41/44	17	10	1	4	4	1	0.96	-	0.861	2	1
20359	M11 240294	2011	C	C: P1.5-1,10-8: F3-6: ST-11	cc11	8	105	7	361	306	1	0.964	-	0.869	5	1
20360	M11 240295	2011	B	B: P1.22,14: F1-5: ST-303	cc41/44	9	205	1	4	4	1	0.96	-	0.861	2	1
20361	M11 240296	2011	B	B: P1.19,15: F4-28: ST-34	cc32	5	242	5	1	1	1	1	-	0.861	6	3
20362	M11 240297	2011	B	B: P1.22,14: F5-5: ST-213	cc213	36	125	1	65	45	3	-	1	-	8	1
20363	M11 240298	2011	Y	Y: P1.5-1,10-1: F4-1: ST-1655	cc23	11	35	2	25	25	2	-	0.85	-	1	1
20364	M11 240299	2011	B	B: P1.7-2,4: F1-5: ST-2314	cc41/44	9	10	1	4	4	1	0.96	-	0.861	2	1
20365	M11 240302	2011	W	W: P1.18-1,3: F4-1: ST-184	cc22	11	9	2	16	16	2	-	0.881	-	1	1
20366	M11 240303	2011	B	B: P1.22,9: F5-12: ST-275	cc269	38	30	1	19	19	2	-	0.888	-	1	1
20367	M11 240304	2011	B	B: P1.19,15: F5-5: ST-2888	Unassigned	26	47	12	212	160	3	-	0.969	-	70	1
20368	M11 240305	2011	W	W: P1.5,2: F1-1: ST-11	cc11	8	10	1	22	22	2	-	0.854	-	1	1
20369	M11 240306	2011	B	B: P1.7-2,4: F1-5: ST-41	cc41/44	9	10	1	4	4	1	0.96	-	0.861	2	1
20370	M11 240309	2011	B	B: P1.22,9: F1-7: ST-9837	Unassigned	3	30	1	19	19	2	-	0.888	-	1	1
20371	M11 240311	2011	B	B: P1.7-2,4: F1-5: ST-9896	cc41/44	9	113	6	4	4	1	0.96	-	0.861	2	1
20372	M11 240312	2011	Y	Y: P1.5-1,10-4: F4-1: ST-23	cc23	11	35	2	25	25	2	-	0.85	-	1	1
20373	M11 240313	2011	Y	Y: P1.5-1,10-1: F4-1: ST-1655	cc23	11	35	2	25	25	2	-	0.85	-	1	1
20374	M11 240314	2011	B	B: P1.22,9: F5-12: ST-1161	cc269	38	11	3	13	13	1	0.937	-	0.88	3	1
20375	M11 240315	2011	B	B: P1.22,9: F5-12: ST-1161	cc269	38	11	3	13	13	1	0.937	-	0.88	3	1
20376	M11 240316	2011	B	B: P1.21,16: F5-1: ST-479	cc269	8	229	18	588	506	2	-	0.854	-	5	2
20377	M11 240317	2011	B	B: P1.19-1,15-11: F5-1: ST-269	cc269	8	120	4	15	15	1	0.859	-	0.916	4	2
20378	M11 240318	2011	B	B: P1.22,9: F5-12: ST-9004	cc269	21	11	3	13	13	1	0.937	-	0.88	3	1
20379	M11 240319	2011	Y	Y: P1.5-1,10-1: F4-1: ST-1655	cc23	11	35	2	25	25	2	-	0.85	-	1	1
20380	M11 240322	2011	Y	Y: P1.5-1,10-1: F4-1: ST-1655	cc23	11	35	2	25	25	2	-	0.85	-	1	1
20381	M11 240323	2011	B	B: P1.5-1,10-26: F1-5: ST-9847	Unassigned	3	8	1	13	13	1	0.937	-	0.88	3	1
20382	M11 240324	2011	C	C: P1.7,16-29: F3-3: ST-32	cc32	6	3	5	1	1	1	1	-	0.861	6	7
20383	M11 240326	2011	Y	Y: P1.5-1,10-1: F4-1: ST-1655	cc23	11	35	2	25	25	2	-	0.85	-	1	1
20384	M11 240328	2011	B	B: P1.7-2,4: F1-5: ST-1194	cc41/44	11	10	1	4	4	1	0.96	-	0.861	2	1
20385	M11 240330	2011	B	B: P1.22,9: F5-12: ST-1161	cc269	38	11	3	13	13	1	0.937	-	0.88	3	1
20386	M11 240333	2011	B	B: P1.7-2,15: F2-9: ST-833	cc41/44	9	16	2	24	24	2	-	0.854	-	1	1
20387	M11 240334	2011	B	B: P1.22,9: F5-12: ST-6604	cc269	38	11	3	13	13	1	0.937	-	0.88	3	1
20388	M11 240335	2011	B	B: P1.22,14: F5-9: ST-162	cc162	26	30	1	21	21	2	-	0.854	-	1	1
20389	M11 240337	2011	B	B: P1.22,14: F5-5: ST-213	cc213	36	243	44	570	494	3	-	0.931	-	12	20
20390	M11 240338	2011	B	B: P1.18-1,3: F5-36: ST-3737	cc1157	21	11	3	68	13	1	0.937	-	0.88	3	1
20391	M11 240339	2011	B	B: P1.5,2: F1-7: ST-60	cc60	3	8	1	13	13	1	0.937	-	0.88	3	1
20392	M11 240341	2011	B	B: P1.12-1,16: F1-5: ST-485	cc41/44	8	10	1	4	4	1	0.96	-	0.861	2	1
20393	M11 240342	2011	B	B: P1.7,16: F3-3: ST-32	cc32	6	3	5	1	1	1	1	-	0.861	6	7
20394	M11 240343	2011	B	B: P1.7-2,4: F1-5: ST-1200	cc41/44	79	10	1	4	4	1	0.96	-	0.861	2	1
20395	M11 240344	2011	B	B: P1.22,14: F5-5: ST-213	cc213	36	125	1	65	45	3	-	1	-	8	1
20396	M11 240346	2011	Y	Y: P1.5-8,10-4: F5-2: ST-168	cc167	9	112	1	72	19	2	-	0.888	-	1	1
20397	M11 240347	2011	C	C: P1.ND,ND: F3-9: ST-5133	cc103	5	10	1	19	19	2	-	0.888	-	1	2
20398	M11 240348	2011	B	B: P1.22,14: F5-5: ST-213	cc213	36	125	1	65	45	3	-	1	-	14	1
20399	M11 240349	2011	W	W: P1.18-1,3: F4-1: ST-22	cc22	11	47	12	69	84	3	-	0.965	-	12	1
20400	M11 240350	2011	B	B: P1.7-2,4: F1-7: ST-9838	cc41/44	9	13	1	14	14	1	0.917	-	0.907	1	1
20401	M11 240352	2011	B	B: P1.22,9: F5-12: ST-1161	cc269	38	11	3	13	13	1	0.937	-	0.88	3	1
20402	M11 240353	2011	B	B: P1.22,9: F5-12: ST-275	cc269	38	30	1	19	19	2	-	0.888	-	1	1
20403	M11 240356	2011	B	B: P1.7,16: F3-3: ST-32	cc32	6	3	5	1	1	1	1	-	0.861	6	7
20404	M11 240358	2011	W/Y	W/Y: P1.5-1,2-2: F5-8: ST-23	cc23	11	35	2	25	25	2	-	0.85	-	1	1
20405	M11 240360	2011	B	B: P1.19,15: F1-5: ST-180	cc41/44	9	10	1	19	19	2	-	0.888	-	1	1
20406	M11 240363	2011	C	C: P1.18-1,3: F3-9: ST-5315	Unassigned	5	10	1	19	19	2	-	0.888	-	1	2
20407	M11 240364	2011	B	B: P1.7-2,4: F1-18: ST-154	cc41/44	11	10	1	4	4	1	0.96	-	0.861	2	1
20408	M11 240365	2011	B	B: P1.7-2,4: F1-5: ST-41	cc41/44	9	10	1	4	4	1	0.96	-	0.861	2	1
20409	M11 240366	2011	B	B: P1.5-1,10-10: F5-1: ST-33	cc32	6	111	1	151	144	1	0.996	-	0.857	1	4
20410	M11 240367	2011	B	B: P1.7-1,1: F1-2: ST-46	cc41/44	3	10	1	4	4	1	0.96	-	0.861	2	1
20411	M11 240368	2011	B	B: P1.19-1,15-11: F5-1: ST-269	cc269	8	120	4	15	15	1	0.859	-	0.916	4	2
20412	M11 240369	2011	B	B: P1.7-2,4: F1-5: ST-41	cc41/44	9	10	1	4	4	1	0.96	-	0.861	2	1
20413	M11 240371	2011	B	B: P1.22,14: F5-9: ST-162	cc162	26	46	20	21	21	2	-	0.854	-	71	9
20414	M11 240372	2011	NG	NG: P1.5-1,10-4: F4-1: ST-1655	cc23	11	35	2	25	25	2	-	0.85	-	1	1
20415	M11 240373	2011	B	B: P1.5-2,10-2: F1-19: ST-1194	cc41/44	11	204	1	4	4	1	0.96	-	0.861	2	1
20416	M11 240375	2011	B	B: P1.19-1,15-11: F5-1: ST-269	cc269	8	120	4	15	15	1	0.859	-	0.916	4	2
20417	M11 240376	2011	B	B: P1.17-1,23: F5-1: ST-269	cc269	8	120	4	16	16	2	-	0.881	-	4	2
20418	M11 240381	2011	B	B: P1.22,14: F5-9: ST-162	cc162	26	30	1	21	21	2	-	0.854	-	1	1
20419	M11 240382	2011	B	B: P1.12-1,16: F1-5: ST-485	cc41/44	8	10	1	4	4	1	0.96	-	0.861	2	1
20420	M11 240383	2011	B	B: P1.19,15: F4-1: ST-3077	cc35	6	30	1	721	119	2	-	0.885	-	1	1
20421	M11 240386	2011	B	B: P1.22,14: F1-5: ST-41	cc41/44	9	10	1	4	4	1	0.96	-	0.861	2	1
20422	M11 240387	2011	W	W: P1.18-1,3: F3-55: ST-184	cc22	11	105	7	141	138	2	-	0.881	-	5	1
20423	M11 240388	2011	B	B: P1.22,14: F5-1: ST-9823	cc269	8	244	11	15	15	1	0.859	-	0.916	4	9
20424	M11 240389	2011	W	W: P1.5,2: F1-1: ST-11	cc11	8	1	1	9	9	1	0.926	-	0.9	1	1
20425	M11 240390	2011	B	B: P1.22,9: F1-7: ST-1159	Unassigned	38	30	1	19	19	2	-	0.888	-	1	1
20426	M11 240391	2011	B	B: P1.7-2,4: F1-5: ST-9824	cc41/44	9	10	1	4	4	1	0.96	-	0.861	2	21
20427	M11 240392	2011	B	B: P1.12-6,13-4: F5-1: ST-290	cc32	1	3	5	1	1	1	1	-	0.861	6	3
20428	M11 240394	2011	B	B: P1.7-2,4: F5-5: ST-5103	cc60	3	8	1	13	13	1	0.937	-	0.88	3	1
20429	M11 240395	2011	B	B: P1.22,9: F5-12: ST-1163	cc269	3	47	12	722	152	3	-	0.98	-	39	1
20430	M11 240396	2011	Y	Y: P1.5-1,10-1: F4-1: ST-1655	cc23	11	35	2	25	25	2	-	0.85	-	1	1
20431	M11 240397	2011	B	B: P1.22,9: F5-12: ST-1161	cc269	38	11	3	13	13	1	0.937	-	0.88	3	1
20432	M11 240398	2011	B	B: P1.7-2,4: F5-5: ST-41	cc41/44	9	204	1	4	4	1	0.96	-	0.861	2	1
20433	M11 240399	2011	Y	Y: P1.5-1,10-1: F4-1: ST-1655	cc23	11	35	2	25	25	2	-	0.85	-	1	1
20434	M11 240401	2011	B	B: P1.22,9: F5-12: ST-1161	cc269	38	245	30	13	13	1	0.937	-	0.88	3	1
20435	M11 240402	2011	B	B: P1.21,16: F3-7: ST-9825	Unassigned	5	173	4	0	#N/A	#N/A	-	-	-	neg	1
20436	M11 240403	2011	W	W: P1.5,2: F1-1: ST-11	cc11	8	10	1	22	22	2	-	0.854	-	1	1
20437	M11 240405	2011	B	B: P1.22,9: F5-12: ST-1161	cc269	38	11	3	13	13	1	0.937	-	0.88	3	1
20438	M11 240406	2011	B	B: P1.7,16: F3-3: ST-32	cc32	6	3	5	1	1	1	1	-	0.861	6	7
20439	M11 240409	2011	B	B: P1.22,14: F5-1: ST-269	cc269	8	120	4	15	15	1	0.859	-	0.916	10	2
20440	M11 240411	2011	Y	Y: P1.5-1,2-2: F5-8: ST-4183	cc23	11	35	2	25	25	2	-	0.85	-	1	1
20441	M11 240412	2011	B	B: P1.5,2: F1-7: ST-1430	cc60	3	8	1	13	13	1	0.937	-	0.88	3	1
20442	M11 240413	2011	B	B: P1.21,9: F5-12: ST-9826	cc269	38	11	3	13	13	1	0.937	-	0.88	3	1
20443	M11 240414	2011	B	B: P1.7-2,4: F5-1: ST-5551	cc41/44	9	13	1	14	14	1	0.917	-	0.907	1	1
20444	M11 240417	2011	W	W: P1.5,2: F1-1: ST-11	cc11	8	10	1	22	22	2	-	0.854	-	1	1
20445	M11 240420	2011	B	B: P1.7-2,4: F1-5: ST-41	cc41/44	9	10	1	4	4	1	0.96	-	0.861	2	1
20446	M11 240422	2011	B	B: P1.12-1,13-7: F1-7: ST-467	cc269	8	120	4	15	15	1	0.859	-	0.916	4	2
20447	M11 240424	2011	B	B: P1.17,16-3: F4-1: ST-3101	cc41/44	9	14	11	24	24	2	-	0.854	-	1	1
20448	M11 240425	2011	B	B: P1.22,14: F1-5: ST-41	cc41/44	9	10	1	4	4	1	0.96	-	0.861	2	1
20449	M11 240427	2011	W	W: P1.5,2: F1-1: ST-11	cc11	8	10	1	22	22	2	-	0.854	-	1	1
20450	M11 240428	2011	B	B: P1.22,9: F5-12: ST-275	cc269	38	11	3	13	13	1	0.937	-	0.88	3	1
20451	M11 240430	2011	Y	Y: P1.5-2,10-1: F4-1: ST-23	cc23	11	206	13	345	293	3	-	0.938	-	23	1
20452	M11 240431	2011	B	B: P1.22,9: F5-12: ST-9827	Unassigned	9	30	1	19	19	2	-	0.888	-	40	1
20453	M11 240434	2011	B	B: P1.18-1,14: F1-5: ST-1194	cc41/44	11	10	1	4	4	1	0.96	-	0.861	2	1
20454	M11 240435	2011	Y	Y: P1.5-1,10-1: F4-1: ST-1655	cc23	11	35	2	25	25	2	-	0.85	-	1	1
20455	M11 240436	2011	B	B: P1.22,9: F5-12: ST-1161	cc269	38	11	3	13	13	1	0.937	-	0.88	3	1
20456	M11 240437	2011	Y	Y: P1.5-1,10-4: F4-3: ST-784	cc92	8	131	1	21	21	2	-	0.854	-	1	1
20457	M11 240440	2011	B	B: P1.5,2: F3-1: ST-60	cc60	3	8	1	13	13	1	0.937	-	0.88	3	1
20458	M11 240441	2011	W	W: P1.22,26: F3-7: ST-2977	cc174	5	36	31	491	421	2	-	0.862	-	41	1
20459	M11 240442	2011	Y	Y: P1.5-1,10-1: F4-1: ST-23	cc23	11	35	2	25	25	2	-	0.85	-	1	1
20460	M12 240156	2012	W	W: P1.5,2: F1-1: ST-11	cc11	8	10	1	22	22	2	-	0.854	-	1	1
20461	M12 240160	2012	W	W: P1.5,2: F1-1: ST-11	cc11	8	10	1	22	22	2	-	0.854	-	1	1
20470	M11 240118	2011	B	B: P1.7-2,4: F1-5: ST-41	cc41/44	9	9	2	4	4	1	0.96	-	0.861	2	1
21092	M11 240443	2011	B	B: P1.19-2,13-1: F3-9: ST-461	cc461	60	256	23	780	90	1	0.903	-	0.911	72	5
21093	M11 240445	2011	B	B: P1.22,9: F5-12: ST-1161	cc269	38	11	3	13	13	1	0.937	-	0.88	3	1
21094	M11 240446	2011	Y	Y: P1.5-1,10-1: F4-1: ST-1655	cc23	11	35	2	25	25	2	-	0.85	-	1	1
21095	M11 240447	2011	B	B: P1.18-1,30: F1-5: ST-1960	cc41/44	9	13	1	14	14	1	0.917	-	0.907	7	1
21096	M11 240448	2011	B	B: P1.19,15: F5-1: ST-8049	cc32	6	3	5	1	1	1	1	-	0.861	6	3
21097	M11 240450	2011	B	B: P1.21,9: F5-12: ST-1161	cc269	38	11	3	13	13	1	0.937	-	0.88	3	1
21098	M11 240451	2011	B	B: P1.18-1,14: F1-5: ST-1194	cc41/44	11	10	1	4	4	1	0.96	-	0.861	2	1
21099	M11 240452	2011	B	B: P1.22,14: F5-5: ST-213	cc213	36	125	1	65	45	3	-	1	-	42	1
21100	M11 240453	2011	B	B: P1.22,10-1: F5-5: ST-275	cc269	38	30	1	19	19	2	-	0.888	-	1	1
21101	M11 240456	2011	B	B: P1.22,14: F5-5: ST-2391	cc213	36	257	24	781	645	3	-	0.988	-	29	5
21102	M11 240457	2011	B	B: P1.19,15: F1-5: ST-9200	cc41/44	9	10	1	356	302	2	-	0.885	-	24	1
21103	M11 240458	2011	B	B: P1.22,9: F1-7: ST-1163	cc269	3	30	1	546	456	1	0.921	-	0.88	73	1
21104	M11 240459	2011	B	B: P1.22,9: F5-12: ST-6428	cc269	11	30	1	19	19	2	-	0.888	-	1	1
21105	M11 240461	2011	Y	Y: P1.5-1,2-2: F5-8: ST-23	cc23	11	35	2	25	25	2	-	0.85	-	1	1
21106	M11 240463	2011	B	B: P1.22,9: F5-12: ST-1161	cc269	38	303	2	44	59	3	-	0.961	-	9	1
21107	M11 240465	2011	Y	Y: P1.5-1,10-4: F4-1: ST-1655	cc23	11	35	2	25	25	2	-	0.85	-	1	1
21108	M11 240466	2011	Y	Y: P1.5-2,10-1: F4-1: ST-8096	cc23	521	206	13	345	293	3	-	0.938	-	23	1
21109	M11 240467	2011	B	B: P1.22,14: F5-9: ST-162	cc162	26	30	1	365	309	1	0.921	-	0.911	1	1
21110	M11 240469	2011	B	B: P1.5-1,10-8: F3-6: ST-10260	cc11	8	258	8	100	100	1	0.972	-	0.884	74	5
21111	M11 240470	2011	B	B: P1.7-1,1: F5-5: ST-213	cc213	36	259	2	782	646	3	-	0.977	-	15	1
21112	M11 240471	2011	B	B: P1.5,2: F1-5: ST-60	cc60	3	8	1	13	13	1	0.937	-	0.88	3	1
21113	M11 240472	2011	B	B: P1.7-1,1: F5-8: ST-2009	cc41/44	9	9	2	24	24	2	-	0.854	-	1	1
21114	M11 240473	2011	B	B: P1.12-1,16: F1-5: ST-485	cc41/44	8	10	1	4	4	1	0.96	-	0.861	2	1
21115	M11 240474	2011	C	C: P1.21-2,28: F1-5: ST-10261	Unassigned	249	260	1	783	647	3	-	0.923	-	43	1
21116	M11 240475	2011	B	B: P1.22,14: F3-6: ST-4051	Unassigned	26	33	1	4	4	1	0.96	-	0.861	2	1
21117	M11 240476	2011	B	B: P1.17-1,23: F1-5: ST-1097	cc41/44	9	126	1	19	19	2	-	0.888	-	1	1
21118	M11 240477	2011	B	B: P1.19-1,15-11: F1-7: ST-467	cc269	8	120	4	15	15	1	0.859	-	0.916	4	2
21119	M11 240479	2011	B	B: P1.7-2,4: F5-9: ST-162	cc162	26	30	1	21	21	2	-	0.854	-	1	1
21120	M11 240480	2011	B	B: P1.19-1,15-11: F3-7: ST-269	cc269	8	120	4	15	15	1	0.859	-	0.916	4	2
21121	M11 240484	2011	B	B: P1.19,15: F1-5: ST-1163	cc269	3	249	21	235	215	1	0.933	-	0.88	5	5
21122	M11 240485	2011	B	B: P1.7-2,4: F1-5: ST-2799	cc41/44	9	30	1	4	4	1	0.96	-	0.861	2	1
21123	M11 240486	2011	W	W: P1.5,2: F1-1: ST-1860	cc11	21	10	1	22	22	2	-	0.854	-	1	1
21124	M11 240487	2011	B	B: P1.5-1,10-4: F1-18: ST-10262	Unassigned	5	261	1	16	16	2	-	0.881	-	1	1
21125	M11 240488	2011	B	B: P1.7,30: F1-5: ST-4237	cc865	9	262	1	72	19	2	-	0.888	-	1	1
21126	M11 240489	2011	B	B: P1.22,1: F5-5: ST-213	cc213	36	10	1	19	19	2	-	0.888	-	1	1
21127	M11 240491	2011	B	B: P1.7-2,4: F1-5: ST-3050	cc41/44	9	10	1	4	4	1	0.96	-	0.861	2	1
21128	M11 240492	2011	B	B: P1.7-2,4: F5-5: ST-9822	cc41/44	36	10	1	4	4	1	0.96	-	0.861	2	1
21129	M11 240493	2011	B	B: P1.7-2,4: F1-5: ST-154	cc41/44	11	10	1	4	4	1	0.96	-	0.861	2	1
21130	M11 240494	2011	Y	Y: P1.5-1,10-1: F4-1: ST-1655	cc23	11	35	2	25	25	2	-	0.85	-	1	1
21131	M11 240495	2011	B	B: P1.7,16: F3-3: ST-259	cc32	6	3	5	1	1	1	1	-	0.861	6	3
21132	M11 240497	2011	W	W: P1.18-1,3: F4-48: ST-1281	cc22	11	9	2	16	16	2	-	0.881	-	1	1
21133	M11 240501	2011	B	B: P1.22,14: F5-12: ST-10263	Unassigned	3	30	1	19	19	2	-	0.888	-	1	1
21134	M11 240502	2011	C	C: P1.5-1,10-8: F4-1: ST-11	cc11	8	105	7	82	78	1	0.964	-	0.869	5	1
21137	M11 240506	2011	B	B: P1.7-2,4: F1-5: ST-8988	Unassigned	3	120	4	73	86	1	0.84	-	0.923	4	2
21138	M11 240507	2011	Y	Y: P1.5-1,10-1: F4-1: ST-1655	cc23	11	35	2	25	25	2	-	0.85	-	1	1
21139	M11 240508	2011	W	W: P1.5-1,10-4: F4-1: ST-184	cc22	11	9	2	16	16	2	-	0.881	-	1	1
21140	M11 240509	2011	B	B: P1.22,9: F1-117: ST-1163	cc269	3	30	1	19	19	2	-	0.888	-	1	1
21141	M11 240510	2011	B	B: P1.22,14: F5-5: ST-213	cc213	36	263	4	235	215	1	0.933	-	0.88	5	1
21142	M11 240592	2011	B	B: P1.12-1,9: F1-5: ST-41	cc41/44	9	10	1	4	4	1	0.96	-	0.861	2	1
21143	M11 240593	2011	B	B: P1.7-1,1: F1-7: ST-10264	cc269	8	120	4	15	15	1	0.859	-	0.916	4	2
21144	M11 240594	2011	B	B: P1.12-1,9: F1-5: ST-41	cc41/44	9	10	1	4	4	1	0.96	-	0.861	2	1
21145	M11 240595	2011	B	B: P1.22,14: F1-5: ST-213	cc213	36	51	45	65	45	3	-	1	-	75	22
21146	M11 240597	2011	B	B: P1.22,9: F5-12: ST-1161	cc269	38	11	3	13	13	1	0.937	-	0.88	3	1
21147	M11 240598	2011	B	B: P1.22,14: F5-5: ST-213	cc213	36	125	1	65	45	3	-	1	-	8	1
21148	M11 240599	2011	Y	Y: P1.5-1,10-1: F4-1: ST-1655	cc23	11	35	2	25	25	2	-	0.85	-	1	1
21151	M11 240657	2011	Y	Y: P1.5-1,10-4: F4-1: ST-23	cc23	11	35	2	25	25	2	-	0.85	-	1	1
21152	M11 240707	2011	B	B: P1.17-1,23: F1-5: ST-1097	cc41/44	9	10	1	19	19	2	-	0.888	-	1	1
21153	M11 240710	2011	Y	Y: P1.5-1,10-1: F4-1: ST-1655	cc23	11	35	2	25	25	2	-	0.85	-	1	1
21154	M11 240712	2011	B	B: P1.22,14-17: F1-7: ST-5906	cc41/44	9	10	1	19	19	2	-	0.888	-	1	1
21155	M11 240713	2011	B	B: P1.22,9: F5-12: ST-6781	Unassigned	38	11	3	13	13	1	0.937	-	0.88	3	1
21156	M11 240716	2011	W	W: P1.18-1,3: F3-9: ST-3795	cc22	11	9	2	16	16	2	-	0.881	-	1	1
21157	M11 240717	2011	Y	Y: P1.5-1,10-1: F4-1: ST-1655	cc23	11	35	2	25	25	2	-	0.85	-	1	1
21158	M11 240719	2011	Y	Y: P1.5-1,2-2: F5-8: ST-3582	cc23	11	35	2	25	25	2	-	0.85	-	1	1
21159	M11 240721	2011	B	B: P1.7-2,4: F1-5: ST-41	cc41/44	9	9	2	4	4	1	0.96	-	0.861	2	1
21160	M11 240723	2011	B	B: P1.7-1,1: F5-7: ST-1345	Unassigned	12	264	46	14	14	1	0.917	-	0.907	1	1
21161	M11 240724	2011	B	B: P1.7-2,4: F1-5: ST-5357	cc41/44	9	113	6	4	4	1	0.96	-	0.861	2	1
21162	M11 240725	2011	B	B: P1.22,9: F5-12: ST-275	cc269	38	120	4	15	15	1	0.859	-	0.916	4	2
21163	M11 240726	2011	W	W: P1.5,2: F1-1: ST-11	cc11	8	10	1	22	22	2	-	0.854	-	1	1
21164	M11 240727	2011	B	B: P1.22,14: F5-2: ST-213	cc213	36	5	1	102	102	2	-	0.842	-	8	10
21165	M11 240728	2011	B	B: P1.17-1,23: F3-3: ST-9889	cc41/44	9	198	1	713	8	1	0.937	-	0.876	21	1
21167	M11 240731	2011	Y	Y: P1.5-1,10-1: F4-1: ST-1655	cc23	11	35	2	25	25	2	-	0.85	-	1	1
21168	M11 240733	2011	B	B: P1.22,9: F5-12: ST-1161	cc269	38	11	3	13	13	1	0.937	-	0.88	3	1
21169	M11 240734	2011	Y	Y: P1.5-1,2-2: F5-8: ST-23	cc23	11	35	2	25	25	2	-	0.85	-	1	1
21170	M11 240735	2011	B	B: P1.22,9: F3-1: ST-6604	cc269	38	11	3	13	13	1	0.937	-	0.88	3	1
21171	M11 240736	2011	B	B: P1.17-1,23-2: F5-2: ST-1097	cc41/44	9	10	1	19	19	2	-	0.888	-	1	1
21172	M11 240737	2011	Y	Y: P1.5-1,10-1: F4-1: ST-1655	cc23	11	35	2	25	25	2	-	0.85	-	1	1
21173	M11 240738	2011	B	B: P1.22,14: F5-5: ST-213	cc213	36	265	8	784	648	1	0.919	-	0.896	9	4
21174	M11 240740	2011	B	B: P1.22,9: F1-7: ST-10265	Unassigned	38	304	25	606	31	3	-	0.965	-	9	1
21175	M11 240741	2011	W	W: P1.18-1,3: F4-1: ST-1286	cc22	11	234	11	74	16	2	-	0.881	-	22	1
21176	M11 240742	2011	B	B: P1.22-1,14: F1-7: ST-35	cc35	6	220	13	708	599	2	-	0.893	-	4	4
21177	M11 240743	2011	B	B: P1.7-2,4: F5-9: ST-162	cc162	26	30	1	21	21	2	-	0.854	-	1	1
21178	M11 240745	2011	Y	Y: P1.5-1,2-2: F5-8: ST-8411	cc23	11	35	2	25	25	2	-	0.85	-	1	1
21179	M11 240749	2011	B	B: P1.19,15: F5-1: ST-749	cc32	6	3	5	1	1	1	1	-	0.861	6	3
21180	M11 240750	2011	B	B: P1.19-1,15-11: F1-2: ST-1942	cc269	8	120	4	15	15	1	0.859	-	0.916	4	2
21181	M11 240762	2011	B	B: P1.22,9: F5-12: ST-275	cc269	38	30	1	19	19	2	-	0.888	-	1	1
21182	M11 240763	2011	B	B: P1.18-1,30-2: F3-6: ST-10266	Unassigned	216	266	1	16	16	2	-	0.881	-	1	4
21183	M11 240765	2011	Y	Y: P1.5-1,10-1: F4-1: ST-1655	cc23	11	35	2	25	25	2	-	0.85	-	1	1
21184	M11 240766	2011	B	B: P1.22,14-6: F1-5: ST-8054	cc41/44	26	13	1	14	14	1	0.917	-	0.907	7	1
21186	M11 240771	2011	B	B: P1.22,14: F5-2: ST-18	cc18	10	18	1	36	37	1	0.937	-	0.847	1	1
21187	M11 240772	2011	Y	Y: P1.5-1,10-4: F4-1: ST-1655	cc23	11	35	2	25	25	2	-	0.85	-	1	1
21188	M11 240773	2011	B	B: P1.7-2,4: F1-5: ST-41	cc41/44	9	13	1	14	14	1	0.917	-	0.907	7	1
21189	M11 240774	2011	B	B: P1.19-1,26: F5-1: ST-269	cc269	8	120	4	15	15	1	0.859	-	0.916	4	2
21190	M11 240775	2011	B	B: P1.19-1,15-11: F5-1: ST-283	cc269	8	120	4	15	15	1	0.859	-	0.916	4	2
21191	M11 240776	2011	B	B: P1.22,9: F5-12: ST-1161	cc269	38	11	3	13	13	1	0.937	-	0.88	3	1
21192	M11 240779	2011	Y	Y: P1.5-1,10-4: F4-1: ST-6463	cc23	11	35	2	25	25	2	-	0.85	-	1	1
21193	M11 240780	2011	W/Y	W/Y: P1.5-1,2-2: F5-1: ST-3651	cc22	11	35	2	25	25	2	-	0.85	-	1	1
21194	M11 240781	2011	B	B: P1.19-1,26: F5-1: ST-269	cc269	8	120	4	15	15	1	0.859	-	0.916	4	2
21195	M11 240783	2011	B	B: P1.5-2,10-1: F4-1: ST-4496	cc41/44	11	206	13	4	4	1	0.96	-	0.861	2	1
21196	M11 240785	2011	C	C: P1.5,2: F5-9: ST-11	cc11	8	1	1	22	22	2	-	0.854	-	1	1
21197	M11 240787	2011	B	B: P1.18-1,30-5: F5-2: ST-939	Unassigned	1	267	2	785	649	1	0.925	-	0.907	1	1
21198	M11 240788	2011	Y	Y: P1.5-1,10-4: F4-1: ST-1655	cc23	11	35	2	25	25	2	-	0.85	-	1	1
21199	M11 240789	2011	B	B: P1.18-1,1: F3-9: ST-103	cc103	5	35	2	25	25	2	-	0.85	-	1	1
21200	M11 240790	2011	B	B: P1.17,16-3: F3-9: ST-136	cc41/44	9	207	8	786	147	2	-	0.858	-	44	13
21201	M11 240793	2011	Y	Y: P1.5-1,2-2: F5-8: ST-23	cc23	11	35	2	25	25	2	-	0.85	-	1	1
21202	M11 240796	2011	B	B: P1.19-1,15-11: F5-1: ST-269	cc269	8	120	4	15	15	1	0.859	-	0.916	10	2
21203	M11 240798	2011	W	W: P1.5,2: F1-1: ST-11	cc11	8	10	1	22	22	2	-	0.854	-	1	1
21204	M11 240799	2011	B	B: P1.19,15: F5-1: ST-33	cc32	6	3	5	1	1	1	1	-	0.861	6	3
21205	M11 240801	2011	Y	Y: P1.5-2,10-12: F4-1: ST-23	cc23	11	35	2	25	25	2	-	0.85	-	1	1
21206	M11 240802	2011	W	W: P1.5,2: F1-1: ST-11	cc11	8	10	1	22	22	2	-	0.854	-	1	1
21207	M11 240803	2011	B	B: P1.22,9: F1-7: ST-1163	cc269	3	30	1	19	19	2	-	0.888	-	1	1
21208	M11 240941	2011	C	C: P1.5-1,10-8: F-ND: ST-11	cc11	8	183	6	13	13	1	0.937	-	0.88	16	1
21209	M11 240942	2011	B	B: P1.22,9: F1-2: ST-275	cc269	38	30	1	19	19	2	-	0.888	-	1	1
21210	M11 240945	2011	B	B: P1.7-2,4: F1-5: ST-340	cc41/44	3	13	1	14	14	1	0.917	-	0.907	1	1
21211	M11 240946	2011	B	B: P1.22,9: F5-12: ST-1161	cc269	38	126	1	66	4	1	0.96	-	0.861	1	1
21212	M11 240948	2011	B	B: P1.19,15: F5-1: ST-213	cc213	36	125	1	65	45	3	-	1	-	8	1
21213	M11 240949	2011	B	B: P1.7-2,4: F1-5: ST-41	cc41/44	9	9	2	4	4	1	0.96	-	0.861	2	1
21214	M11 240953	2011	W	W: P1.5,2: F1-1: ST-11	cc11	8	10	1	22	22	2	-	0.854	-	1	1
21215	M11 240954	2011	B	B: P1.22,9: F5-12: ST-1161	cc269	38	11	3	13	13	1	0.937	-	0.88	3	1
21216	M11 240975	2011	W	W: P1.5,2: F1-1: ST-11	cc11	8	10	1	22	22	2	-	0.854	-	1	1
21217	M11 240976	2011	B	B: P1.17-1,23-7: F5-5: ST-213	cc213	36	125	1	65	45	3	-	1	-	14	1
21218	M11 240977	2011	B	B: P1.22,14: F1-7: ST-213	cc213	36	125	1	65	45	3	-	1	-	8	1
21219	M11 240978	2011	B	B: P1.31,16: F3-9: ST-13	cc269	8	10	1	19	19	2	-	0.888	-	1	1
21220	M11 240979	2011	B	B: P1.22,9: F5-12: ST-275	cc269	38	11	3	13	13	1	0.937	-	0.88	3	1
21221	M11 240980	2011	B	B: P1.22,14: F5-5: ST-10267	cc213	180	125	1	65	45	3	-	1	-	8	-
21222	M11 240981	2011	B	B: P1.7-2,15: F5-5: ST-41	cc41/44	9	10	1	4	4	1	0.96	-	0.861	2	1
21223	M11 240982	2011	Y	Y: P1.5-1,10-1: F4-1: ST-1655	cc23	11	35	2	25	25	2	-	0.85	-	1	1
21224	M11 240983	2011	B	B: P1.22,9: F1-7: ST-1159	Unassigned	38	268	32	14	14	1	0.917	-	0.907	1	1
21225	M11 240984	2011	B	B: P1.19-3,15: F5-8: ST-32	cc32	6	269	2	56	69	1	0.9	-	0.934	45	1
21226	M11 240986	2011	B	B: P1.22,9: F5-12: ST-1161	cc269	38	11	3	13	13	1	0.937	-	0.88	3	1
21227	M11 240987	2011	Y	Y: P1.5-1,2-2: F1-96: ST-23	cc23	11	35	2	25	25	2	-	0.85	-	1	1
21228	M11 240988	2011	B	B: P1.19-2,13-1: F5-5: ST-461	cc461	60	9	2	71	47	3	-	0.961	-	1	1
21229	M11 240991	2011	Y	Y: P1.5-1,10-1: F4-1: ST-1655	cc23	11	35	2	25	25	2	-	0.85	-	1	1
21230	M11 240992	2011	B	B: P1.19,15: F1-5: ST-1194	cc41/44	11	10	1	4	4	1	0.96	-	0.861	2	1
21231	M11 240993	2011	B	B: P1.19-1,15-11: F3-7: ST-7226	cc269	8	120	4	15	15	1	0.859	-	0.916	4	2
21232	M11 240994	2011	C	C: P1.5-1,10-8: F3-6: ST-11	cc11	8	105	7	787	650	1	0.938	-	0.9	5	1
21233	M11 240995	2011	B	B: P1.22,9: F5-12: ST-1161	cc269	38	11	3	13	13	1	0.937	-	0.88	3	1
21234	M11 241013	2011	B	B: P1.7-2,4: F1-5: ST-41	cc41/44	9	13	1	788	651	3	-	0.923	-	76	1
21235	M11 241014	2011	B	B: P1.7-2,4: F1-5: ST-41	cc41/44	9	113	6	4	4	1	0.96	-	0.861	2	1
21236	M11 241015	2011	B	B: P1.12-1,9: F1-5: ST-41	cc41/44	9	10	1	4	4	1	0.96	-	0.861	2	1
21237	M11 241016	2011	B	B: P1.5-1,10-8: F5-13: ST-11	cc11	8	223	16	669	0	1	-	-	-	5	1
21238	M11 241018	2011	B	B: P1.18-1,14: F1-5: ST-1194	cc41/44	11	10	1	4	4	1	0.96	-	0.861	2	1
21239	M11 241019	2011	B	B: P1.19,15: F5-1: ST-33	cc32	6	3	5	1	1	1	1	-	0.861	77	3
21240	M11 241023	2011	B	B: P1.22-28,9: F3-46: ST-5529	cc18	5	30	1	626	539	1	0.941	-	0.851	1	1
21241	M11 241024	2011	B	B: P1.19-1,15-11: F5-1: ST-269	cc269	8	120	4	15	15	1	0.859	-	0.916	4	ND
21242	M11 241025	2011	B	B: P1.21-2,28: F5-2: ST-6605	cc35	3	29	1	24	24	2	-	0.854	-	1	4
21243	M11 241026	2011	B	B: P1.21-7,16: F5-36: ST-10268	cc1157	21	11	3	68	13	1	0.937	-	0.88	3	1
21244	M11 241027	2011	B	B: P1.22,9: F5-12: ST-1161	cc269	38	11	3	13	13	1	0.937	-	0.88	3	1
21245	M11 241028	2011	B	B: P1.12-1,9: F1-5: ST-41	cc41/44	9	10	1	4	4	1	0.96	-	0.861	2	1
21246	M11 241031	2011	B	B: P1.19-2,13-1: F5-5: ST-461	cc461	60	9	2	71	47	3	-	0.961	-	1	1
21247	M11 241032	2011	B	B: P1.12-1,16: F1-5: ST-485	cc41/44	8	10	1	4	4	1	0.96	-	0.861	2	1
21248	M11 241033	2011	B	B: P1.7-1,4-1: F5-1: ST-269	cc269	8	120	4	15	15	1	0.859	-	0.916	4	2
21249	M11 241034	2011	B	B: P1.5-1,10-1: F3-1: ST-282	cc282	2	115	22	193	202	2	-	0.862	-	1	1
21250	M11 241035	2011	Y	Y: P1.5-1,10-1: F4-1: ST-1655	cc23	11	35	2	25	25	2	-	0.85	-	1	1
21251	M11 241036	2011	B	B: P1.22,14: F5-1: ST-269	cc269	8	120	4	15	15	1	0.859	-	0.916	4	2
21252	M11 241037	2011	B	B: P1.5-2,10-1: F5-36: ST-1157	cc1157	21	11	3	68	13	1	0.937	-	0.88	3	1
21253	M11 241039	2011	C	C: P1.5-1,10-8: F3-6: ST-11	cc11	8	105	7	13	13	1	0.937	-	0.88	5	1
21254	M11 241040	2011	B	B: P1.7-2,4: F1-7: ST-10269	cc41/44	106	35	2	789	25	2	-	0.85	-	1	1
21255	M11 241042	2011	Y	Y: P1.5-1,10-1: F4-1: ST-1655	cc23	11	35	2	25	25	2	-	0.85	-	1	1
21256	M11 241043	2011	C	C: P1.5-1,10-8: F-ND: ST-11	cc11	8	183	6	13	13	1	0.937	-	0.88	16	1
21257	M11 241044	2011	B	B: P1.18-1,14: F1-5: ST-1194	cc41/44	11	10	1	4	4	1	0.96	-	0.861	2	1
21258	M11 241046	2011	B	B: P1.22,14: F1-5: ST-10270	cc41/44	11	10	1	4	4	1	0.96	-	0.861	2	1
21259	M11 241047	2011	Y	Y: P1.5-1,10-4: F4-1: ST-1655	cc23	11	35	2	25	25	2	-	0.85	-	1	1
21260	M11 241048	2011	B	B: P1.22,9: F5-12: ST-275	cc269	38	30	1	19	19	2	-	0.888	-	1	1
21261	M11 241050	2011	B	B: P1.18-1,3: F1-5: ST-1194	cc41/44	11	10	1	4	4	1	0.96	-	0.861	2	1
21262	M11 241051	2011	Y	Y: P1.5-1,2-2: F5-8: ST-23	cc23	11	35	2	25	25	2	-	0.85	-	1	1
21263	M11 241054	2011	B	B: P1.22,14: F1-5: ST-1194	cc41/44	11	10	1	4	4	1	0.96	-	0.861	2	1
21264	M11 241055	2011	B	B: P1.7-2,4: F1-5: ST-41	cc41/44	9	113	6	4	4	1	0.96	-	0.861	2	1
21265	M11 241057	2011	B	B: P1.7,16-26: F1-5: ST-32	cc32	6	270	2	272	224	1	0.9	-	0.953	15	1
21266	M11 241058	2011	B	B: P1.22,14: F5-9: ST-162	cc162	26	166	8	108	108	1	0.968	-	0.892	25	3
21267	M11 241059	2011	B	B: P1.5-1,10-4: F5-36: ST-10271	cc1157	11	11	3	68	13	1	0.937	-	0.88	3	1
21268	M11 241060	2011	B	B: P1.22,14: F1-7: ST-575	cc213	82	8	1	13	13	1	0.937	-	0.88	3	1
21269	M11 241061	2011	B	B: P1.19-1,15-11: F5-1: ST-1049	cc269	8	120	4	15	15	1	0.859	-	0.916	4	2
21270	M11 241063	2011	B	B: P1.7-2,4: F1-5: ST-41	cc41/44	9	9	2	4	4	1	0.96	-	0.861	2	1
21271	M11 241064	2011	Y	Y: P1.5-1,2-2: F5-1: ST-3651	cc22	11	35	2	25	25	2	-	0.85	-	1	1
21272	M11 241065	2011	Y	Y: P1.5-1,10-1: F4-1: ST-1655	cc23	11	35	2	25	25	2	-	0.85	-	1	1
21273	M11 241066	2011	B	B: P1.7-2,4: F1-5: ST-41	cc41/44	9	10	1	4	4	1	0.96	-	0.861	19	6
21274	M11 241067	2011	Y	Y: P1.5-1,10-1: F4-1: ST-1655	cc23	11	35	2	25	25	2	-	0.85	-	1	1
21275	M11 241068	2011	B	B: P1.22,14: F5-5: ST-213	cc213	36	125	1	65	45	3	-	1	-	8	1
21276	M11 241069	2011	Y	Y: P1.5-1,2-2: F5-8: ST-23	cc23	11	35	2	25	25	2	-	0.85	-	1	1
21277	M11 241072	2011	B	B: P1.7-2,4: F1-5: ST-8988	Unassigned	3	120	4	73	86	1	0.84	-	0.923	4	2
21278	M11 241073	2011	B	B: P1.12-1,9: F1-5: ST-41	cc41/44	9	10	1	4	4	1	0.96	-	0.861	2	1
21279	M11 241074	2011	B	B: P1.22,9: F1-7: ST-1163	cc269	3	30	1	19	19	2	-	0.888	-	1	1
21280	M11 241075	2011	B	B: P1.5,2: F2-16: ST-60	cc60	3	8	1	13	13	1	0.937	-	0.88	3	1
21281	M11 241076	2011	B	B: P1.22,16-59: F5-5: ST-10272	cc213	36	125	1	65	45	3	-	1	-	78	1
21282	M11 241077	2011	B	B: P1.22,9: F5-12: ST-1161	cc269	38	11	3	13	13	1	0.937	-	0.88	3	1
21283	M11 241078	2011	Y	Y: P1.5-1,10-10: F4-1: ST-1655	cc23	11	35	2	25	25	2	-	0.85	-	1	1
21284	M12 240000	2012	B	B: P1.22,14: F5-5: ST-213	cc213	36	10	1	19	19	2	-	0.888	-	1	1
21285	M12 240001	2012	B	B: P1.22,9: F5-12: ST-1161	cc269	38	11	3	13	13	1	0.937	-	0.88	3	1
21286	M12 240002	2012	B	B: P1.7-2,4: F1-5: ST-7385	cc41/44	111	13	1	14	14	1	0.917	-	0.907	30	1
21287	M12 240003	2012	B	B: P1.22,9: F5-12: ST-1161	cc269	38	11	3	13	13	1	0.937	-	0.88	3	1
21288	M12 240004	2012	W	W: P1.5,2: F1-1: ST-11	cc11	8	10	1	22	22	2	-	0.854	-	1	1
21289	M12 240006	2012	B	B: P1.22,9: F5-12: ST-1161	cc269	38	11	3	13	13	1	0.937	-	0.88	3	1
21290	M12 240008	2012	W	W: P1.18-1,3: F3-9: ST-184	cc22	11	9	2	16	16	2	-	0.881	-	1	1
21291	M12 240009	2012	B	B: P1.7-2,4: F1-5: ST-41	cc41/44	9	13	1	14	14	1	0.917	-	0.907	7	1
21292	M12 240010	2012	B	B: P1.7-2,4: F1-18: ST-154	cc41/44	11	10	1	4	4	1	0.96	-	0.861	2	1
21293	M12 240011	2012	Y	Y: P1.5-1,2-2: F5-8: ST-23	cc23	11	35	2	25	25	2	-	0.85	-	1	1
21294	M12 240012	2012	Y	Y: P1.5-1,10-1: F4-1: ST-1655	cc23	11	35	2	25	25	2	-	0.85	-	1	1
21295	M12 240013	2012	Y	Y: P1.5-1,10-1: F4-1: ST-1655	cc23	11	35	2	25	25	2	-	0.85	-	1	1
21296	M12 240014	2012	C	C: P1.18-7,9: F5-8: ST-877	cc41/44	58	10	1	19	19	2	-	0.888	-	1	1
21297	M12 240015	2012	NG	NG: P1.19-1,15-11: F5-1: ST-269	cc269	8	120	4	15	15	1	0.859	-	0.916	4	2
21298	M12 240016	2012	W	W: P1.5,2: F1-1: ST-11	cc11	8	10	1	22	22	2	-	0.854	-	1	1
21299	M12 240018	2012	B	B: P1.7-2,4: F1-5: ST-154	cc41/44	11	10	1	4	4	1	0.96	-	0.861	2	1
21300	M12 240019	2012	B	B: P1.7-2,30-2: F3-9: ST-461	cc461	60	127	2	71	47	3	-	0.961	-	1	1
21301	M12 240020	2012	B	B: P1.7-2,4: F5-1: ST-3754	cc41/44	9	160	1	4	4	1	0.96	-	0.861	2	4
21302	M12 240021	2012	W	W: P1.5,2: F1-1: ST-11	cc11	8	10	1	22	22	2	-	0.854	-	1	1
21303	M12 240022	2012	B	B: P1.22,14: F5-5: ST-213	cc213	36	125	1	65	45	3	-	1	-	8	1
21304	M12 240024	2012	Y	Y: P1.5-1,10-1: F4-1: ST-1655	cc23	11	35	2	25	25	2	-	0.85	-	1	1
21305	M12 240027	2012	W	W: P1.5,2: F1-1: ST-11	cc11	8	10	1	22	22	2	-	0.854	-	1	1
21306	M12 240028	2012	B	B: P1.22,14: F5-5: ST-213	cc213	36	125	1	65	45	3	-	1	-	79	1
21307	M12 240029	2012	B	B: P1.22,9: F5-12: ST-1161	cc269	38	11	3	13	13	1	0.937	-	0.88	3	1
21308	M12 240030	2012	B	B: P1.22,9: F5-12: ST-275	cc269	38	30	1	19	19	2	-	0.888	-	1	1
21309	M12 240031	2012	B	B: P1.22,14: F5-9: ST-162	cc162	26	116	8	29	29	3	-	0.935	-	46	8
21310	M12 240032	2012	B	B: P1.7-2,4: F1-5: ST-41	cc41/44	9	113	6	4	4	1	0.96	-	0.861	2	1
21311	M12 240033	2012	B	B: P1.5-1,10-8: F4-1: ST-11	cc11	8	105	7	505	430	1	0.98	-	0.873	5	1
21312	M12 240034	2012	B	B: P1.17,16-3: F5-1: ST-1774	cc269	14	120	4	149	143	3	-	0.965	-	4	2
21313	M12 240035	2012	B	B: P1.18-1,14: F1-5: ST-1194	cc41/44	11	10	1	4	4	1	0.96	-	0.861	2	1
21314	M12 240036	2012	B	B: P1.7-2,4: F1-5: ST-41	cc41/44	9	10	1	4	4	1	0.96	-	0.861	2	1
21315	M12 240038	2012	B	B: P1.22,14: F1-15: ST-162	cc162	26	30	1	365	309	1	0.921	-	0.911	1	1
21316	M12 240039	2012	B	B: P1.7-2,4: F1-5: ST-154	cc41/44	11	10	1	4	4	1	0.96	-	0.861	2	1
21317	M12 240040	2012	B	B: P1.19-1,15-11: F5-1: ST-1049	cc269	8	120	4	15	15	1	0.859	-	0.916	4	2
21318	M12 240041	2012	B	B: P1.7-2,4: F5-1: ST-3754	cc41/44	9	160	1	4	4	1	0.96	-	0.861	2	4
21319	M12 240042	2012	B	B: P1.18-1,3: F1-5: ST-41	cc41/44	9	113	6	4	4	1	0.96	-	0.861	2	1
21320	M12 240044	2012	B	B: P1.7-2,13-1: F5-8: ST-10273	Unassigned	10	18	1	36	37	1	0.937	-	0.847	1	1
21321	M12 240045	2012	B	B: P1.7-2,4: F1-5: ST-41	cc41/44	9	13	1	14	14	1	0.917	-	0.907	7	1
21322	M12 240046	2012	B	B: P1.22,9: F5-12: ST-1161	cc269	38	11	3	13	13	1	0.937	-	0.88	3	1
21323	M12 240047	2012	B	B: P1.22,14: F5-5: ST-10274	cc213	36	125	1	65	45	3	-	1	-	14	1
21324	M12 240048	2012	B	B: P1.22,14-6: F5-8: ST-10275	Unassigned	21	271	1	19	19	2	-	0.888	-	1	1
21325	M12 240051	2012	B	B: P1.22,14: F5-9: ST-162	cc162	26	166	8	108	108	1	0.968	-	0.892	25	3
21326	M12 240054	2012	B	B: P1.7,16: F3-3: ST-32	cc32	6	272	33	145	2	1	0.968	-	0.873	5	1
21327	M12 240057	2012	B	B: P1.19-1,3-5: F5-1: ST-269	cc269	8	120	4	15	15	1	0.859	-	0.916	4	2
21328	M12 240058	2012	B	B: P1.7,16: F3-3: ST-32	cc32	6	272	33	145	2	1	0.968	-	0.873	5	1
21329	M12 240059	2012	B	B: P1.22,9-10: F5-12: ST-1161	cc269	38	11	3	13	13	1	0.937	-	0.88	3	1
21330	M12 240061	2012	B	B: P1.5-1,10-8: F4-1: ST-11	cc11	8	105	7	361	306	1	0.964	-	0.869	5	1
21331	M12 240062	2012	B	B: P1.21,16: F5-9: ST-10276	cc18	10	18	1	36	37	1	0.937	-	0.847	1	1
21332	M12 240063	2012	B	B: P1.22,14: F5-5: ST-3635	cc213	9	125	1	65	45	3	-	1	-	14	1
21333	M12 240066	2012	B	B: P1.19-1,15-11: F5-1: ST-269	cc269	8	120	4	15	15	1	0.859	-	0.916	10	2
21334	M12 240067	2012	W	W: P1.5,2: F1-1: ST-11	cc11	8	10	1	22	22	2	-	0.854	-	1	1
21335	M12 240069	2012	B	B: P1.5,2: F5-9: ST-11	cc11	8	1	1	22	22	2	-	0.854	-	1	1
21336	M12 240070	2012	B	B: P1.7,30: F1-7: ST-10277	Unassigned	11	173	4	0	#N/A	#N/A	-	-	-	neg	1
21337	M12 240071	2012	B	B: P1.7,30: F1-5: ST-10278	cc41/44	17	208	17	220	167	3	-	0.95	-	8	1
21338	M12 240072	2012	Y	Y: P1.5-1,10-1: F4-1: ST-1655	cc23	11	35	2	25	25	2	-	0.85	-	1	1
21339	M12 240076	2012	Y	Y: P1.21,16: F3-7: ST-1466	cc174	5	30	1	21	21	2	-	0.854	-	1	1
21340	M12 240077	2012	B	B: P1.7-2,4: F1-5: ST-41	cc41/44	9	13	1	14	14	1	0.917	-	0.907	7	1
21341	M12 240078	2012	B	B: P1.7-2,4: F1-5: ST-1194	cc41/44	11	10	1	4	4	1	0.96	-	0.861	2	1
21342	M12 240079	2012	B	B: P1.22,9: F5-12: ST-1161	cc269	38	11	3	13	13	1	0.937	-	0.88	3	1
21343	M12 240080	2012	Y	Y: P1.5-1,10-4: F4-1: ST-1655	cc23	11	35	2	25	25	2	-	0.85	-	1	1
21344	M12 240081	2012	B	B: P1.7-2,4: F1-5: ST-9352	cc41/44	3	13	1	14	14	1	0.917	-	0.907	1	1
21345	M12 240083	2012	B	B: P1.22,14: F1-7: ST-10279	cc213	82	8	1	13	13	1	0.937	-	0.88	3	1
21346	M12 240084	2012	Y	Y: P1.5-1,10-10: F4-1: ST-1655	cc23	11	35	2	25	25	2	-	0.85	-	1	1
21347	M12 240085	2012	B	B: P1.7-2,4: F1-5: ST-10280	cc41/44	79	10	1	19	19	2	-	0.888	-	1	1
21348	M12 240086	2012	B	B: P1.7,30: F5-1: ST-1049	cc269	8	120	4	15	15	1	0.859	-	0.916	4	2
21349	M12 240088	2012	W	W: P1.18-1,3: F5-2: ST-1224	cc22	78	9	2	16	16	2	-	0.881	-	1	1
21350	M12 240090	2012	B	B: P1.22,9: F5-12: ST-1163	cc269	3	30	1	19	19	2	-	0.888	-	1	1
21351	M12 240092	2012	B	B: P1.22,14: F5-5: ST-3496	cc213	36	125	1	1	1	1	1	-	0.861	6	1
21352	M12 240093	2012	E	E: P1.5,2: F1-7: ST-4146	cc60	3	8	1	13	13	1	0.937	-	0.88	3	1
21353	M12 240094	2012	B	B: P1.12-1,9: F1-5: ST-41	cc41/44	9	10	1	4	4	1	0.96	-	0.861	2	1
21354	M12 240095	2012	W	W: P1.5,2: F1-1: ST-11	cc11	8	10	1	22	22	2	-	0.854	-	1	1
21355	M12 240097	2012	B	B: P1.7-2,4: F1-5: ST-41	cc41/44	9	13	1	14	14	1	0.917	-	0.907	30	1
21356	M12 240098	2012	Y	Y: P1.5-1,10-1: F4-1: ST-1655	cc23	11	35	2	25	25	2	-	0.85	-	1	1
21357	M12 240099	2012	B	B: P1.22,9: F5-12: ST-1163	cc269	3	30	1	19	19	2	-	0.888	-	1	1
21358	M12 240100	2012	B	B: P1.19-1,15-11: F5-1: ST-269	cc269	8	120	4	15	15	1	0.859	-	0.916	4	2
21359	M12 240101	2012	C	C: P1.5-1,10-8: F3-6: ST-11	cc11	8	105	7	361	306	1	0.964	-	0.869	5	1
21360	M12 240103	2012	B	B: P1.18-1,34: F1-5: ST-6058	cc41/44	9	10	1	19	19	2	-	0.888	-	1	1
21361	M12 240104	2012	NG	NG: P1.5-1,10-8: F5-13: ST-11	cc11	8	223	16	669	0	1	-	-	-	5	1
21362	M12 240105	2012	B	B: P1.22,9: F5-12: ST-1161	cc269	38	11	3	13	13	1	0.937	-	0.88	3	1
21363	M12 240107	2012	B	B: P1.22,14: F5-12: ST-10281	cc213	9	105	7	205	187	3	-	0.98	-	5	1
21364	M12 240111	2012	C	C: P1.5-1,10-8: F3-6: ST-11	cc11	8	105	7	361	306	1	0.964	-	0.869	5	1
21365	M12 240114	2012	B	B: P1.22,14: F1-5: ST-7309	cc213	36	10	1	4	4	1	0.96	-	0.861	2	1
21366	M12 240115	2012	Y	Y: P1.5-1,10-1: F4-1: ST-1655	cc23	11	35	2	25	25	2	-	0.85	-	1	1
21367	M12 240116	2012	B	B: P1.19-1,15-11: F5-1: ST-1195	cc269	8	120	4	15	15	1	0.859	-	0.916	4	2
21368	M12 240117	2012	B	B: P1.7-2,4: F1-5: ST-340	cc41/44	3	13	1	14	14	1	0.917	-	0.907	1	1
21369	M12 240118	2012	B	B: P1.7-2,4: F1-5: ST-10282	cc41/44	9	10	1	4	4	1	0.96	-	0.861	2	1
21370	M12 240120	2012	B	B: P1.22,9: F1-7: ST-10283	Unassigned	17	30	1	19	19	2	-	0.888	-	1	1
21371	M12 240121	2012	W	W: P1.18-7,9-5: F3-7: ST-184	cc22	11	9	2	16	16	2	-	0.881	-	1	1
21372	M12 240122	2012	Y	Y: P1.5-1,10-1: F4-1: ST-1655	cc23	11	35	2	25	25	2	-	0.85	-	1	1
21373	M12 240123	2012	Y	Y: P1.5-1,10-1: F4-1: ST-1655	cc23	11	35	2	25	25	2	-	0.85	-	1	1
21374	M12 240124	2012	B	B: P1.7-2,4: F1-5: ST-41	cc41/44	9	113	6	4	4	1	0.96	-	0.861	2	1
21375	M12 240125	2012	W	W: P1.5,2: F1-146: ST-11	cc11	8	10	1	22	22	2	-	0.854	-	1	1
21376	M12 240126	2012	B	B: P1.ND,ND: F1-5: ST-1194	cc41/44	11	10	1	4	4	1	0.96	-	0.861	2	1
21377	M12 240127	2012	W	W: P1.5,2: F1-1: ST-11	cc11	8	10	1	22	22	2	-	0.854	-	1	1
21378	M12 240128	2012	B	B: P1.7-1,1: F1-5: ST-46	cc41/44	3	10	1	4	4	1	0.96	-	0.861	2	1
21379	M12 240131	2012	NG	NG: P1.22,14: F1-5: ST-41	cc41/44	9	10	1	4	4	1	0.96	-	0.861	2	1
21380	M12 240132	2012	W	W: P1.18-7,9-5: F4-1: ST-184	cc22	11	9	2	16	16	2	-	0.881	-	1	1
21381	M12 240133	2012	W	W: P1.5,2: F1-146: ST-11	cc11	8	10	1	22	22	2	-	0.854	-	1	1
21382	M12 240134	2012	B	B: P1.7-2,4: F1-5: ST-9171	cc41/44	9	10	1	4	4	1	0.96	-	0.861	2	1
21383	M12 240135	2012	B	B: P1.22,14-6: F5-36: ST-1157	cc1157	21	11	3	68	13	1	0.937	-	0.88	3	1
21384	M12 240138	2012	B	B: P1.17-1,23: F1-5: ST-1097	cc41/44	9	10	1	19	19	2	-	0.888	-	1	1
21385	M12 240142	2012	B	B: P1.22,14: F5-5: ST-213	cc213	36	10	1	4	4	1	0.96	-	0.861	2	1
21386	M12 240144	2012	W	W: P1.5,2: F1-1: ST-10284	cc11	8	10	1	22	22	2	-	0.854	-	1	1
21387	M12 240145	2012	B	B: P1.22,14: F5-5: ST-213	cc213	36	273	2	29	29	3	-	0.935	-	39	1
21388	M12 240146	2012	B	B: P1.7,16-26: F3-3: ST-10285	cc32	6	30	1	19	19	2	-	0.888	-	1	1
21390	M12 240149	2012	B	B: P1.7-2,16-26: F3-3: ST-10286	cc32	6	270	2	272	224	1	0.9	-	0.953	80	1
21391	M12 240150	2012	B	B: P1.5-1,10-22: F4-1: ST-2307	Unassigned	38	5	1	102	102	2	-	0.842	-	8	1
21392	M12 240151	2012	B	B: P1.22,14: F5-5: ST-213	cc213	36	125	1	65	45	3	-	1	-	8	1
21393	M12 240153	2012	B	B: P1.19-1,15-11: F5-1: ST-269	cc269	8	120	4	15	15	1	0.859	-	0.916	4	2
21394	M12 240155	2012	B	B: P1.7-2,4: F1-5: ST-41	cc41/44	9	113	6	4	4	1	0.96	-	0.861	2	1
21396	M12 240158	2012	B	B: P1.22,14-6: F1-5: ST-10287	cc60	6	8	1	13	13	1	0.937	-	0.88	3	1
21398	M12 240161	2012	B	B: P1.7-1,1: F1-5: ST-41	cc41/44	9	10	1	4	4	1	0.96	-	0.861	2	1
21399	M12 240166	2012	Y	Y: P1.5-1,2-2: F5-8: ST-23	cc23	11	35	2	25	25	2	-	0.85	-	1	1
21400	M12 240167	2012	B	B: P1.7-2,4: F1-5: ST-1194	cc41/44	11	10	1	4	4	1	0.96	-	0.861	2	1
21401	M12 240168	2012	B	B: P1.19,15-1: F1-5: ST-43	cc41/44	9	10	1	19	19	2	-	0.888	-	1	ND
21402	M12 240169	2012	NG	NG: P1.18,25-11: F1-84: ST-414	cc41/44	9	10	1	19	19	2	-	0.888	-	1	1
21403	M12 240171	2012	Y	Y: P1.5-1,10-1: F4-1: ST-1655	cc23	11	35	2	25	25	2	-	0.85	-	1	1
21404	M12 240174	2012	Y	Y: P1.5-1,2-2: F5-8: ST-23	cc23	11	35	2	25	25	2	-	0.85	-	1	1
21405	M12 240175	2012	B	B: P1.22,9: F5-12: ST-1163	cc269	3	30	1	19	19	2	-	0.888	-	1	1
21406	M12 240176	2012	B	B: P1.22,9: F3-9: ST-10288	cc269	8	11	3	13	13	1	0.937	-	0.88	3	1
21407	M12 240177	2012	C	C: P1.5-1,10-8: F3-6: ST-11	cc11	8	105	7	361	306	1	0.964	-	0.869	5	1
21408	M12 240180	2012	Y	Y: P1.5-1,10-10: F4-1: ST-1655	cc23	11	35	2	25	25	2	-	0.85	-	1	1
21409	M12 240181	2012	Y	Y: P1.5-1,10-1: F3-4: ST-1624	cc167	9	48	10	24	24	2	-	0.854	-	1	1
21410	M12 240184	2012	Y	Y: P1.5-1,10-4: F4-1: ST-23	cc23	11	35	2	25	25	2	-	0.85	-	1	1
21411	M12 240186	2012	B	B: P1.7-2,13-2: F4-1: ST-6782	cc41/44	17	13	1	14	14	1	0.917	-	0.907	7	1
21412	M12 240187	2012	B	B: P1.5-1,10-7: F1-5: ST-2314	cc41/44	9	10	1	4	4	1	0.96	-	0.861	2	1
21413	M12 240188	2012	B	B: P1.5-2,10: F5-130: ST-10289	cc18	10	18	1	36	37	1	0.937	-	0.847	1	1
21414	M12 240191	2012	B	B: P1.18-1,34: F1-5: ST-6058	cc41/44	9	10	1	19	19	2	-	0.888	-	1	1
21415	M12 240194	2012	B	B: P1.19,15: F5-1: ST-5151	Unassigned	6	3	5	1	1	1	1	-	0.861	6	3
21416	M12 240197	2012	B	B: P1.7-2,4: F5-9: ST-162	cc162	26	30	1	21	21	2	-	0.854	-	1	1
21417	M12 240200	2012	C	C: P1.ND,ND: F3-9: ST-5133	cc103	5	10	1	19	19	2	-	0.888	-	1	2
21418	M12 240201	2012	B	B: P1.22,14: F5-1: ST-269	cc269	8	120	4	15	15	1	0.859	-	0.916	10	2
21419	M12 240202	2012	C	C: P1.5-1,10-8: F-ND: ST-11	cc11	8	183	6	13	13	1	0.937	-	0.88	16	1
21420	M12 240203	2012	B	B: P1.22,14: F5-9: ST-162	cc162	26	3	5	1	1	1	1	-	0.861	6	3
21421	M12 240205	2012	Y	Y: P1.21,16: F3-7: ST-1466	cc174	5	30	1	21	21	2	-	0.854	-	1	1
21422	M12 240206	2012	B	B: P1.22,9: F5-12: ST-1161	cc269	38	11	3	13	13	1	0.937	-	0.88	3	1
21423	M12 240207	2012	B	B: P1.7-2,4: F1-5: ST-154	cc41/44	11	10	1	4	4	1	0.96	-	0.861	2	1
21424	M12 240208	2012	B	B: P1.22,14: F5-5: ST-9884	cc213	36	224	2	44	59	3	-	0.961	-	9	1
21425	M12 240211	2012	B	B: P1.19-1,15-11: F5-1: ST-269	cc269	8	120	4	15	15	1	0.859	-	0.916	10	2
21426	M12 240213	2012	B	B: P1.12-1,9: F1-5: ST-41	cc41/44	9	10	1	4	4	1	0.96	-	0.861	2	1
21427	M12 240214	2012	B	B: P1.22,9: F5-12: ST-10290	Unassigned	38	11	3	13	13	1	0.937	-	0.88	3	1
21428	M12 240215	2012	B	B: P1.22,14: F5-5: ST-3496	cc213	36	125	1	1	1	1	1	-	0.861	6	1
21429	M12 240216	2012	B	B: P1.22,9: F5-36: ST-4713	Unassigned	38	11	3	13	13	1	0.937	-	0.88	3	1
21430	M12 240219	2012	C	C: P1.12-1,13-1: F1-7: ST-10291	cc269	8	120	4	15	15	1	0.859	-	0.916	4	2
21431	M12 240220	2012	B	B: P1.12-1,16: F1-5: ST-485	cc41/44	8	10	1	4	4	1	0.96	-	0.861	2	1
21432	M12 240222	2012	B	B: P1.5,2: F1-7: ST-10292	cc60	3	8	1	13	13	1	0.937	-	0.88	3	1
21433	M12 240223	2012	B	B: P1.22,9: F5-12: ST-1161	cc269	38	11	3	13	13	1	0.937	-	0.88	3	1
21434	M12 240224	2012	B	B: P1.7-2,4: F1-5: ST-41	cc41/44	9	113	6	4	4	1	0.96	-	0.861	2	1
21435	M12 240225	2012	B	B: P1.22,14: F3-9: ST-2660	cc213	36	125	1	65	45	3	-	1	-	8	1
21436	M12 240226	2012	B	B: P1.22,14: F1-2: ST-213	cc213	36	275	2	29	29	3	-	0.935	-	12	1
21437	M12 240227	2012	B	B: P1.12-1,16: F1-5: ST-485	cc41/44	8	10	1	4	4	1	0.96	-	0.861	2	1
21438	M12 240228	2012	B	B: P1.22,14: F5-5: ST-213	cc213	36	125	1	65	45	3	-	1	-	8	1
21439	M12 240229	2012	B	B: P1.22,9: F5-12: ST-275	cc269	38	11	3	13	13	1	0.937	-	0.88	3	1
21440	M12 240230	2012	Y	Y: P1.5-2,10-1: F4-1: ST-23	cc23	11	35	2	25	25	2	-	0.85	-	1	1
21441	M12 240231	2012	B	B: P1.19,15: F5-1: ST-749	cc32	6	3	5	1	1	1	1	-	0.861	6	3
21442	M12 240232	2012	B	B: P1.12-1,13-1: F5-2: ST-9311	Unassigned	3	276	2	764	110	1	0.98	-	0.88	32	1
21443	M12 240237	2012	Y	Y: P1.5-1,10-4: F4-1: ST-1655	cc23	11	35	2	25	25	2	-	0.85	-	1	1
21444	M12 240238	2012	B	B: P1.22,9: F3-9: ST-7143	Unassigned	38	11	3	13	13	1	0.937	-	0.88	3	1
21445	M12 240239	2012	B	B: P1.17-1,23: F1-7: ST-269	cc269	8	120	4	15	15	1	0.859	-	0.916	4	2
21446	M12 240240	2012	W	W: P1.5,2: F1-146: ST-11	cc11	8	10	1	22	22	2	-	0.854	-	1	1
21447	M12 240241	2012	Y	Y: P1.5-2,10-1: F4-1: ST-23	cc23	11	35	2	25	25	2	-	0.85	-	1	1
21448	M12 240242	2012	Y	Y: P1.5-1,10-1: F4-1: ST-1655	cc23	11	35	2	25	25	2	-	0.85	-	1	1
21449	M12 240243	2012	B	B: P1.19-1,15-11: F5-1: ST-269	cc269	8	120	4	15	15	1	0.859	-	0.916	10	2
21450	M12 240245	2012	B	B: P1.7-2,4: F1-5: ST-340	cc41/44	3	120	4	790	652	1	0.856	-	0.904	4	2
21451	M12 240248	2012	Y	Y: P1.5-1,10-4: F4-1: ST-6463	cc23	11	35	2	25	25	2	-	0.85	-	1	1
21452	M12 240249	2012	B	B: P1.7-2,4: F3-3: ST-41	cc41/44	9	10	1	4	4	1	0.96	-	0.861	2	6
21453	M12 240250	2012	B	B: P1.5-1,2-2: F1-15: ST-2766	Unassigned	9	142	31	629	541	2	-	0.885	-	41	2
21454	M12 240251	2012	W	W: P1.18-1,3: F4-1: ST-1281	cc22	11	9	2	16	16	2	-	0.881	-	1	1
21455	M12 240252	2012	B	B: P1.7-2,4: F5-8: ST-2203	cc41/44	11	13	1	122	14	1	0.917	-	0.907	7	1
21456	M12 240253	2012	B	B: P1.22,14: F5-5: ST-213	cc213	36	277	2	352	185	3	-	0.98	-	4	1
21457	M12 240254	2012	B	B: P1.22,14: F5-5: ST-213	cc213	36	277	2	352	185	3	-	0.98	-	4	1
21458	M12 240255	2012	C	C: P1.5,2: F3-3: ST-11	cc11	8	1	1	22	22	2	-	0.854	-	1	1
21460	M12 240257	2012	B	B: P1.18-7,9: F1-7: ST-571	cc41/44	58	10	1	19	19	2	-	0.888	-	1	1
21461	M12 240259	2012	B	B: P1.18-1,3: F1-7: ST-7395	Unassigned	3	173	4	0	#N/A	#N/A	-	-	-	neg	1
21462	M12 240261	2012	B	B: P1.19,15: F4-28: ST-34	cc32	5	242	5	1	1	1	1	-	0.861	6	3
21463	M12 240263	2012	B	B: P1.7-2,4: F1-5: ST-3619	cc41/44	9	209	2	791	653	3	-	0.977	-	17	1
21464	M12 240264	2012	B	B: P1.7-2,4: F1-5: ST-41	cc41/44	9	113	6	4	4	1	0.96	-	0.861	2	1
21465	M12 240267	2012	B	B: P1.22,14: F5-1: ST-269	cc269	8	120	4	15	15	1	0.859	-	0.916	4	2
21466	M12 240272	2012	Y	Y: P1.5-1,10-1: F4-1: ST-1655	cc23	11	35	2	25	25	2	-	0.85	-	1	1
21467	M12 240273	2012	B	B: P1.22,14: F5-5: ST-213	cc213	36	125	1	65	45	3	-	1	-	47	1
21468	M12 240274	2012	B	B: P1.5-2,10-4: F3-3: ST-41	cc41/44	9	10	1	4	4	1	0.96	-	0.861	2	6
21469	M12 240277	2012	B	B: P1.19-1,15-35: F5-1: ST-639	cc32	6	278	1	98	90	1	0.903	-	0.911	29	1
21470	M12 240284	2012	B	B: P1.18-1,14: F1-5: ST-10293	cc41/44	11	10	1	4	4	1	0.96	-	0.861	2	1
21471	M12 240287	2012	B	B: P1.22,9: F5-12: ST-1161	cc269	38	11	3	13	13	1	0.937	-	0.88	3	1
21472	M12 240288	2012	Y	Y: P1.5-2,10-1: F4-1: ST-23	cc23	11	35	2	25	25	2	-	0.85	-	1	1
21473	M12 240289	2012	Y	Y: P1.5-1,10-4: F4-1: ST-10294	cc23	11	35	2	25	25	2	-	0.85	-	1	1
21474	M12 240290	2012	B	B: P1.7-2,4: F1-5: ST-340	cc41/44	3	195	9	281	14	1	0.917	-	0.907	5	1
21475	M12 240291	2012	Y	Y: P1.5-1,10-4: F4-1: ST-23	cc23	11	35	2	25	25	2	-	0.85	-	1	1
21476	M12 240293	2012	Y	Y: P1.5-1,10-1: F4-1: ST-1655	cc23	11	35	2	25	25	2	-	0.85	-	1	1
21477	M12 240294	2012	B	B: P1.19-1,15-11: F1-7: ST-467	cc269	8	120	4	15	15	1	0.859	-	0.916	4	2
21478	M12 240296	2012	B	B: P1.18-7,9: F3-7: ST-571	cc41/44	58	10	1	19	19	2	-	0.888	-	1	1
21479	M12 240299	2012	B	B: P1.7-2,4: F1-47: ST-3818	cc41/44	11	10	1	4	4	1	0.96	-	0.861	2	1
21480	M12 240300	2012	Y	Y: P1.5-1,10-1: F4-1: ST-1655	cc23	11	35	2	25	25	2	-	0.85	-	1	1
21481	M12 240301	2012	B	B: P1.18-1,3: F1-5: ST-10295	cc41/44	11	10	1	4	4	1	0.96	-	0.861	2	1
21482	M12 240302	2012	B	B: P1.22,14-6: F1-15: ST-10296	Unassigned	9	13	1	19	19	2	-	0.888	-	8	2
21483	M12 240303	2012	B	B: P1.22,9: F2-16: ST-5849	Unassigned	38	11	3	13	13	1	0.937	-	0.88	3	1
21484	M12 240305	2012	B	B: P1.7-2,4: F1-5: ST-41	cc41/44	9	113	6	4	4	1	0.96	-	0.861	2	1
21485	M12 240306	2012	B	B: P1.22,9: F3-9: ST-10297	Unassigned	38	11	3	13	13	1	0.937	-	0.88	3	1
21486	M12 240307	2012	B	B: P1.22,9: F5-1: ST-1195	cc269	8	120	4	15	15	1	0.859	-	0.916	4	2
21487	M12 240308	2012	B	B: P1.22,14: F1-5: ST-41	cc41/44	9	10	1	4	4	1	0.96	-	0.861	2	1
21488	M12 240309	2012	B	B: P1.7-2,4: F3-9: ST-2266	cc41/44	9	13	1	14	14	1	0.917	-	0.907	1	1
21489	M12 240310	2012	B	B: P1.19-1,15-11: F5-1: ST-269	cc269	8	120	4	15	15	1	0.859	-	0.916	4	2
21490	M12 240314	2012	B	B: P1.7-2,4: F1-5: ST-340	cc41/44	3	195	9	281	14	1	0.917	-	0.907	5	1
21491	M12 240315	2012	B	B: P1.7-2,4: F1-5: ST-9352	cc41/44	3	13	1	14	14	1	0.917	-	0.907	1	1
21492	M12 240317	2012	W	W: P1.5,2: F1-1: ST-11	cc11	8	10	1	22	22	2	-	0.854	-	1	1
21493	M12 240318	2012	Y	Y: P1.5-1,10-1: F4-1: ST-1655	cc23	11	35	2	25	25	2	-	0.85	-	1	1
21494	M12 240319	2012	B	B: P1.22,14: F1-5: ST-41	cc41/44	9	10	1	4	4	1	0.96	-	0.861	2	1
21495	M12 240320	2012	B	B: P1.7-1,1: F3-3: ST-7460	cc32	6	232	19	593	510	1	0.893	-	0.897	81	8
21496	M12 240321	2012	B	B: P1.7-2,4: F1-5: ST-1403	cc41/44	9	13	1	14	14	1	0.917	-	0.907	7	1
21497	M12 240322	2012	Y	Y: P1.5-1,2-2: F5-8: ST-23	cc23	11	35	2	25	25	2	-	0.85	-	1	1
21498	M12 240323	2012	C	C: P1.18-1,3: F1-7: ST-467	cc269	8	120	4	15	15	1	0.859	-	0.916	4	2
21499	M12 240324	2012	W	W: P1.5,2: F1-1: ST-11	cc11	8	10	1	22	22	2	-	0.854	-	1	1
21500	M12 240325	2012	B	B: P1.7-2,4: F1-5: ST-41	cc41/44	9	113	6	4	4	1	0.96	-	0.861	2	1
21501	M12 240326	2012	B	B: P1.22,14: F5-5: ST-213	cc213	36	125	1	65	45	3	-	1	-	14	1
21502	M12 240328	2012	Y	Y: P1.5-1,10-4: F4-1: ST-23	cc23	11	35	2	25	25	2	-	0.85	-	1	1
21503	M12 240329	2012	B	B: P1.22,14: F1-7: ST-575	cc213	82	30	1	34	12	1	0.937	-	0.88	1	1
21504	M12 240330	2012	Y	Y: P1.5-1,10-4: F1-15: ST-884	cc167	11	279	8	757	628	1	0.923	-	0.903	1	9
21505	M12 240332	2012	Y	Y: P1.5-1,10-8: F5-12: ST-5987	cc103	9	112	1	72	19	2	-	0.888	-	1	1
21506	M12 240333	2012	B	B: P1.7-2,4: F1-5: ST-41	cc41/44	9	9	2	4	4	1	0.96	-	0.861	2	1
21507	M12 240334	2012	B	B: P1.7-2,4: F1-5: ST-340	cc41/44	3	13	1	14	14	1	0.917	-	0.907	1	1
21508	M12 240335	2012	B	B: P1.22,9: F5-12: ST-1163	cc269	3	30	1	19	19	2	-	0.888	-	1	1
26732	M13 240559	2013	C	C: P1.5-1,10-8: F-ND: ST-11	cc11	8	183	6	13	13	1	0.937	-	0.88	16	1
27778	M12 240336	2012	B	B: P1.7-2,4: F5-5: ST-1475	cc41/44	9	13	1	14	14	1	0.917	-	0.907	1	1
27779	M12 240338	2012	B	B: P1.21-2,28: F5-2: ST-10692	cc35	6	105	7	92	95	2	-	0.854	-	5	1
27780	M12 240340	2012	B	B: P1.22,14: F5-5: ST-213	cc213	36	309	47	350	297	1	0.869	-	0.95	15	11
27781	M12 240341	2012	B	B: P1.22,9: F5-12: ST-9180	cc269	608	11	3	13	13	1	0.937	-	0.88	3	1
27782	M12 240347	2012	B	B: P1.19-2,13-1: F5-5: ST-461	cc461	60	127	2	71	47	3	-	0.961	-	1	1
27783	M12 240349	2012	B	B: P1.17-1,23: F5-2: ST-1097	cc41/44	9	10	1	19	19	2	-	0.888	-	1	1
27784	M12 240644	2012	B	B: P1.21,16: F4-1: ST-4051	Unassigned	26	33	1	4	4	1	0.96	-	0.861	2	1
27785	M12 240647	2012	B	B: P1.7-2,16: F3-3: ST-1096	cc32	6	30	1	552	476	3	-	0.943	-	82	1
27786	M12 240650	2012	B	B: P1.22,14: F1-5: ST-41	cc41/44	9	10	1	4	4	1	0.96	-	0.861	2	1
27787	M12 240651	2012	B	B: P1.18-1,3: F1-5: ST-1194	cc41/44	11	10	1	724	608	1	0.956	-	0.857	2	1
27788	M12 240652	2012	B	B: P1.7-2,4: F1-5: ST-154	cc41/44	11	10	1	4	4	1	0.96	-	0.861	2	1
27789	M12 240653	2012	B	B: P1.22,9: F5-12: ST-1161	cc269	38	11	3	13	13	1	0.937	-	0.88	3	1
27790	M12 240654	2012	B	B: P1.7-2,4-37: F1-5: ST-10693	cc41/44	110	10	1	4	4	1	0.96	-	0.861	2	1
27791	M12 240656	2012	B	B: P1.18-1,3: F1-5: ST-3695	cc41/44	9	13	1	14	14	1	0.917	-	0.907	7	1
27792	M12 240658	2012	B	B: P1.7-2,4: F1-5: ST-42	cc41/44	9	13	1	14	14	1	0.917	-	0.907	7	1
27793	M12 240659	2012	B	B: P1.18-1,3: F5-5: ST-1617	cc22	11	9	2	16	16	2	-	0.881	-	1	1
27794	M12 240664	2012	B	B: P1.7-2,4: F1-5: ST-41	cc41/44	9	9	2	4	4	1	0.96	-	0.861	2	1
27795	M12 240667	2012	B	B: P1.18-1,14: F1-5: ST-1194	cc41/44	11	10	1	4	4	1	0.96	-	0.861	2	1
27796	M12 240668	2012	B	B: P1.7-2,4-15: F1-5: ST-41	cc41/44	9	113	6	4	4	1	0.96	-	0.861	2	1
27797	M12 240669	2012	B	B: P1.22,9: F5-12: ST-10694	Unassigned	38	310	2	15	15	1	0.859	-	0.916	4	1
27798	M12 240672	2012	B	B: P1.5-1,10-4: F3-7: ST-1097	cc41/44	9	10	1	19	19	2	-	0.888	-	1	1
27799	M12 240674	2012	B	B: P1.22,9: F5-12: ST-1161	cc269	38	11	3	13	13	1	0.937	-	0.88	3	1
27800	M12 240675	2012	B	B: P1.19-1,15-11: F5-1: ST-10695	cc269	8	120	4	15	15	1	0.859	-	0.916	4	2
27801	M12 240678	2012	B	B: P1.17-1,23: F1-7: ST-269	cc269	8	120	4	15	15	1	0.859	-	0.916	4	2
27802	M12 240681	2012	B	B: P1.18-7,9: F1-7: ST-571	cc41/44	58	10	1	19	19	2	-	0.888	-	1	1
27803	M12 240682	2012	B	B: P1.5-1,10-8: F4-1: ST-11	cc11	8	105	7	669	0	1	-	-	-	5	1
27804	M12 240683	2012	B	B: P1.22,9: F5-12: ST-2157	cc269	38	11	3	13	13	1	0.937	-	0.88	3	1
27805	M12 240684	2012	B	B: P1.22,9: F1-7: ST-9199	Unassigned	612	30	1	19	19	2	-	0.888	-	18	1
27806	M12 240685	2012	B	B: P1.17,16-93: F1-20: ST-3242	Unassigned	9	14	11	24	24	2	-	0.854	-	1	1
27807	M12 240688	2012	B	B: P1.22,9: F5-12: ST-1161	cc269	38	11	3	13	13	1	0.937	-	0.88	3	1
27808	M12 240691	2012	B	B: P1.22,9: F5-12: ST-1161	cc269	38	11	3	13	13	1	0.937	-	0.88	3	1
27809	M12 240693	2012	B	B: P1.12-6,13-4: F5-1: ST-290	cc32	1	3	5	1	1	1	1	-	0.861	6	3
27810	M12 240694	2012	B	B: P1.5-1,2-2: F5-1: ST-1855	cc269	9	120	4	15	15	1	0.859	-	0.916	4	2
27811	M12 240697	2012	B	B: P1.7-2,4: F1-5: ST-41	cc41/44	9	113	6	4	4	1	0.96	-	0.861	2	1
27812	M12 240699	2012	B	B: P1.7-2,4: F1-5: ST-10696	cc41/44	3	13	1	14	14	1	0.917	-	0.907	1	1
27813	M12 240703	2012	B	B: P1.22,14: F5-5: ST-213	cc213	36	125	1	65	45	3	-	1	-	11	1
27814	M12 240704	2012	B	B: P1.19-2,13-1: F3-9: ST-7261	cc461	192	127	2	71	47	3	-	0.961	-	1	1
27815	M12 240705	2012	B	B: P1.5-35,10-4: F5-5: ST-10697	cc213	36	29	1	148	141	3	-	0.969	-	1	4
27816	M12 240706	2012	B	B: P1.12-1,9: F1-5: ST-10698	cc41/44	9	10	1	4	4	1	0.96	-	0.861	2	1
27817	M12 240707	2012	B	B: P1.19-1,3-5: F5-1: ST-269	cc269	8	120	4	15	15	1	0.859	-	0.916	4	2
27818	M12 240712	2012	B	B: P1.7-2,4: F5-12: ST-154	cc41/44	11	10	1	4	4	1	0.96	-	0.861	2	1
27819	M12 240714	2012	B	B: P1.7,16: F3-3: ST-259	cc32	6	3	5	1	1	1	1	-	0.861	6	3
27820	M12 240718	2012	B	B: P1.19,15: F1-5: ST-1163	cc269	3	30	1	19	19	2	-	0.888	-	1	1
27821	M12 240719	2012	B	B: P1.22,9: F5-12: ST-1161	cc269	38	11	3	13	13	1	0.937	-	0.88	3	1
27822	M12 240720	2012	B	B: P1.7-2,4: F1-5: ST-41	cc41/44	9	113	6	4	4	1	0.96	-	0.861	2	1
27823	M12 240724	2012	B	B: P1.22,14: F5-5: ST-7676	cc213	36	125	1	65	45	3	-	1	-	83	1
27824	M12 240725	2012	B	B: P1.22-1,14: F5-5: ST-35	cc35	6	233	1	16	16	2	-	0.881	-	1	4
27825	M12 240729	2012	B	B: P1.22,9: F5-5: ST-275	cc269	38	11	3	13	13	1	0.937	-	0.88	3	1
27826	M12 240730	2012	B	B: P1.22,14-6: F5-1: ST-34	cc32	5	3	5	1	1	1	1	-	0.861	6	3
27827	M12 240732	2012	B	B: P1.19,15: F5-1: ST-8049	cc32	6	3	5	1	1	1	1	-	0.861	6	3
27828	M12 240733	2012	B	B: P1.22,14: F5-5: ST-10699	cc213	36	311	48	525	450	1	0.964	-	0.861	84	5
27829	M12 240735	2012	B	B: P1.19,15: F5-1: ST-749	cc32	6	3	5	1	1	1	1	-	0.861	6	3
27830	M12 240736	2012	B	B: P1.22,14: F5-9: ST-162	cc162	26	108	14	15	15	1	0.859	-	0.916	4	5
27831	M12 240737	2012	B	B: P1.22,14: F5-1: ST-479	cc269	8	120	4	15	15	1	0.859	-	0.916	4	2
27832	M12 240739	2012	B	B: P1.22,14: F5-9: ST-162	cc162	26	13	1	845	700	1	0.913	-	0.903	7	1
27833	M12 240741	2012	B	B: P1.7-2,4: F1-25: ST-8054	cc41/44	26	113	6	4	4	1	0.96	-	0.861	2	1
27834	M12 240745	2012	B	B: P1.17,16-3: F5-1: ST-1774	cc269	14	120	4	149	143	3	-	0.965	-	4	2
27835	M12 240749	2012	B	B: P1.22,9: F5-12: ST-4713	Unassigned	38	11	3	13	13	1	0.937	-	0.88	3	1
27836	M12 240750	2012	B	B: P1.12-1,9: F1-5: ST-41	cc41/44	9	10	1	4	4	1	0.96	-	0.861	2	1
27837	M12 240752	2012	B	B: P1.7-2,4: F1-5: ST-154	cc41/44	11	10	1	4	4	1	0.96	-	0.861	2	1
27838	M12 240758	2012	B	B: P1.17-1,23: F3-3: ST-10700	cc32	6	30	1	588	506	2	-	0.854	-	5	1
27839	M12 240763	2012	B	B: P1.19-2,13-1: F3-9: ST-1946	cc461	192	127	2	71	47	3	-	0.961	-	1	1
27840	M12 240765	2012	B	B: P1.12-1,13-1: F5-1: ST-2738	cc269	21	30	1	106	106	2	-	0.877	-	1	1
27841	M12 240769	2012	B	B: P1.7-13,14: F1-84: ST-1572	Unassigned	9	11	3	13	13	1	0.937	-	0.88	3	1
27842	M12 240773	2012	B	B: P1.19-1,15-11: F5-1: ST-1049	cc269	8	312	4	15	15	1	0.859	-	0.916	4	2
27843	M12 240778	2012	B	B: P1.19-2,13-1: F3-9: ST-1946	cc461	192	127	2	71	47	3	-	0.961	-	1	1
27844	M12 240781	2012	B	B: P1.22,9: F5-12: ST-275	cc269	38	30	1	19	19	2	-	0.888	-	1	1
27845	M12 240782	2012	B	B: P1.22,14: F5-5: ST-213	cc213	36	313	24	839	345	3	-	0.969	-	48	19
27846	M12 240783	2012	B	B: P1.21-7,16: F1-5: ST-41	cc41/44	9	10	1	4	4	1	0.96	-	0.861	2	1
27847	M12 240785	2012	B	B: P1.7-2,4: F1-5: ST-41	cc41/44	9	10	1	4	4	1	0.96	-	0.861	2	1
27848	M12 240786	2012	B	B: P1.22-1,14: F3-6: ST-1359	Unassigned	11	37	1	14	14	1	0.917	-	0.907	1	1
27849	M12 240787	2012	B	B: P1.19-2,13: F3-9: ST-1946	cc461	192	127	2	71	47	3	-	0.961	-	1	1
27850	M12 240790	2012	B	B: P1.19,15: F5-1: ST-33	cc32	6	3	5	1	1	1	1	-	0.861	6	3
27851	M12 240793	2012	B	B: P1.22,9: F5-12: ST-7789	cc269	6	11	3	13	13	1	0.937	-	0.88	3	1
27852	M12 240794	2012	B	B: P1.19-3,15: F1-117: ST-10701	cc35	9	314	49	846	27	2	-	0.885	-	9	4
27853	M12 240803	2012	B	B: P1.19,15: F4-28: ST-34	cc32	5	3	5	1	1	1	1	-	0.861	6	3
27854	M12 240805	2012	B	B: P1.7-12,14: F5-9: ST-4953	Unassigned	3	35	2	847	701	2	-	0.877	-	1	1
27855	M12 240806	2012	B	B: P1.7-1,4-1: F3-6: ST-9774	cc18	6	315	1	36	37	1	0.937	-	0.847	1	1
27856	M12 240807	2012	B	B: P1.7-2,4: F1-5: ST-10702	Unassigned	3	13	1	14	14	1	0.917	-	0.907	1	1
27857	M12 240808	2012	B	B: P1.5-1,10-1: F5-12: ST-282	cc282	2	47	12	69	84	3	-	0.965	-	13	1
27858	M12 240809	2012	B	B: P1.21,16: F5-36: ST-8944	Unassigned	3	233	1	16	16	2	-	0.881	-	1	4
27859	M12 240810	2012	B	B: P1.17-1,23: F1-7: ST-269	cc269	8	120	4	15	15	1	0.859	-	0.916	4	2
27860	M12 240812	2012	B	B: P1.19-5,15: F5-1: ST-479	cc269	8	316	26	155	2	1	0.968	-	0.873	5	1
27861	M12 240814	2012	B	B: P1.22,9: F5-12: ST-10703	cc269	38	30	1	19	19	2	-	0.888	-	40	1
27862	M12 240817	2012	B	B: P1.7,16: F3-3: ST-32	cc32	6	3	5	1	1	1	1	-	0.861	6	7
27863	M12 240818	2012	B	B: P1.7,16: F3-3: ST-259	cc32	6	3	5	1	1	1	1	-	0.861	6	3
27864	M12 240819	2012	B	B: P1.19-2,13-1: F5-5: ST-461	cc461	60	9	2	71	47	3	-	0.961	-	1	1
27865	M12 240825	2012	B	B: P1.12-1,16: F1-5: ST-485	cc41/44	8	10	1	4	4	1	0.96	-	0.861	2	1
27866	M12 240827	2012	B	B: P1.22,9: F5-12: ST-1161	cc269	38	11	3	13	13	1	0.937	-	0.88	3	1
27867	M12 240831	2012	B	B: P1.19-1,15-11: F5-1: ST-1049	cc269	8	120	4	15	15	1	0.859	-	0.916	4	2
27868	M12 240834	2012	B	B: P1.19-5,15: F5-1: ST-479	cc269	8	316	26	155	2	1	0.968	-	0.873	5	1
27869	M12 240842	2012	B	B: P1.22,9: F5-12: ST-1161	cc269	38	11	3	13	13	1	0.937	-	0.88	3	1
27870	M12 240843	2012	B	B: P1.22-1,14: F5-2: ST-1976	Unassigned	12	317	34	848	702	1	0.968	-	0.873	31	1
27871	M12 240844	2012	B	B: P1.19,16: F5-5: ST-8223	cc461	5	127	2	71	47	3	-	0.961	-	1	1
27872	M12 240846	2012	B	B: P1.7-2,4: F1-5: ST-41	cc41/44	9	10	1	4	4	1	0.96	-	0.861	19	6
27873	M12 240847	2012	B	B: P1.7-2,4: F3-3: ST-3666	cc41/44	9	10	1	4	4	1	0.96	-	0.861	2	6
27874	M12 240848	2012	B	B: P1.22,14: F4-1: ST-213	cc213	36	120	4	346	294	3	-	0.992	-	4	2
27875	M12 240849	2012	B	B: P1.7-2,4: F1-5: ST-41	cc41/44	9	10	1	4	4	1	0.96	-	0.861	2	1
27876	M12 240850	2012	B	B: P1.7-2,4: F1-5: ST-1194	cc41/44	11	10	1	4	4	1	0.96	-	0.861	2	1
27877	M12 240851	2012	B	B: P1.22,9: F5-12: ST-275	cc269	38	11	3	13	13	1	0.937	-	0.88	3	1
27878	M12 240852	2012	B	B: P1.19-1,15-11: F3-7: ST-269	cc269	8	120	4	302	245	1	0.992	-	0.861	10	2
27879	M12 240853	2012	B	B: P1.19-1,3-5: F5-1: ST-269	cc269	8	120	4	15	15	1	0.859	-	0.916	4	2
27880	M12 240858	2012	B	B: P1.19-1,15-11: F5-1: ST-269	cc269	8	125	1	33	31	3	-	0.965	-	49	1
27881	M12 240861	2012	B	B: P1.22,9: F5-7: ST-2123	Unassigned	26	113	6	16	16	2	-	0.881	-	56	1
27882	M12 240865	2012	B	B: P1.7,16-48: F1-5: ST-10704	cc18	10	11	3	13	13	1	0.937	-	0.88	3	1
27883	M12 240866	2012	B	B: P1.22,14: F5-5: ST-213	cc213	36	277	2	352	185	3	-	0.98	-	4	1
27884	M12 240867	2012	B	B: P1.19,13-1: F5-97: ST-479	cc269	8	120	4	15	15	1	0.859	-	0.916	4	2
27885	M12 240868	2012	B	B: P1.7-2,4: F1-5: ST-1090	cc41/44	9	318	1	4	4	1	0.96	-	0.861	2	1
27886	M12 240872	2012	B	B: P1.21,16: F1-15: ST-11142	Unassigned	9	30	1	25	25	2	-	0.85	-	1	1
27887	M12 240873	2012	B	B: P1.19-2,13-55: F5-36: ST-10705	cc461	685	8	1	13	13	1	0.937	-	0.88	3	1
27888	M12 240874	2012	B	B: P1.7,16-2: F1-5: ST-74	cc32	5	3	5	1	1	1	1	-	0.861	6	3
27889	M12 240876	2012	B	B: P1.19,15-1: F1-24: ST-2821	cc41/44	9	2	1	849	703	1	0.956	-	0.857	2	1
27890	M12 240877	2012	B	B: P1.22,9: F5-12: ST-1161	cc269	38	11	3	13	13	1	0.937	-	0.88	85	1
27891	M12 240878	2012	B	B: P1.22,14: F5-9: ST-162	cc162	26	30	1	21	21	2	-	0.854	-	1	1
27892	M12 240879	2012	B	B: P1.22,9: F5-12: ST-1161	cc269	38	11	3	13	13	1	0.937	-	0.88	3	1
27893	M12 240880	2012	B	B: P1.19-1,15-11: F1-7: ST-269	cc269	8	10	1	19	19	2	-	0.888	-	1	2
27894	M12 240884	2012	B	B: P1.7-2,16-29: F3-3: ST-32	cc32	6	3	5	1	1	1	1	-	0.861	6	7
27895	M12 240887	2012	B	B: P1.7-2,4: F1-5: ST-1153	cc41/44	63	10	1	4	4	1	0.96	-	0.861	2	1
27896	M12 240893	2012	B	B: P1.19-1,15-11: F5-1: ST-8288	cc269	8	120	4	15	15	1	0.859	-	0.916	4	2
27897	M12 240896	2012	B	B: P1.7-2,16: F3-3: ST-1096	cc32	6	319	1	273	74	1	0.929	-	0.923	20	1
27898	M12 240899	2012	B	B: P1.22,14: F5-5: ST-213	cc213	36	226	8	773	187	3	-	0.98	-	26	5
27899	M12 240900	2012	B	B: P1.19-1,15-11: F5-1: ST-2592	cc269	8	120	4	15	15	1	0.859	-	0.916	4	2
27900	M12 240901	2012	B	B: P1.19,15-1: F5-15: ST-10706	cc41/44	9	320	4	635	87	1	0.863	-	0.92	4	1
27901	M12 240902	2012	B	B: P1.19,16: F1-5: ST-1233	cc41/44	9	10	1	4	4	1	0.96	-	0.861	2	1
27902	M13 240000	2013	B	B: P1.22,9: F3-3: ST-1831	Unassigned	38	30	1	19	19	2	-	0.888	-	1	1
27903	M13 240001	2013	B	B: P1.7-2,4: F1-5: ST-41	cc41/44	9	9	2	4	4	1	0.96	-	0.861	2	1
27904	M13 240003	2013	B	B: P1.19-1,15-11: F5-1: ST-269	cc269	8	120	4	15	15	1	0.859	-	0.916	4	2
27905	M13 240004	2013	B	B: P1.18-1,1: F5-1: ST-479	cc269	8	229	18	588	506	2	-	0.854	-	5	2
27906	M13 240005	2013	B	B: P1.19-1,15-11: F1-7: ST-2166	cc269	8	120	4	15	15	1	0.859	-	0.916	4	2
27907	M13 240006	2013	B	B: P1.19,15: F3-9: ST-461	cc461	60	127	2	71	47	3	-	0.961	-	1	1
27908	M13 240007	2013	B	B: P1.18-1,3: F1-5: ST-1194	cc41/44	11	10	1	850	704	1	0.953	-	0.869	2	1
27909	M13 240009	2013	B	B: P1.7-2,4: F1-5: ST-2799	cc41/44	9	13	1	14	14	1	0.917	-	0.907	7	1
27910	M13 240012	2013	B	B: P1.12-1,9: F1-5: ST-41	cc41/44	9	10	1	4	4	1	0.96	-	0.861	2	1
27911	M13 240014	2013	B	B: P1.22,9: F5-12: ST-1161	cc269	38	11	3	13	13	1	0.937	-	0.88	3	1
27912	M13 240017	2013	B	B: P1.19,15: F5-1: ST-10707	cc32	6	3	5	1	1	1	1	-	0.861	6	3
27913	M13 240019	2013	B	B: P1.18,25: F1-5: ST-7612	cc41/44	9	341	34	848	702	1	0.968	-	0.873	31	1
27914	M13 240021	2013	B	B: P1.19-2,13-1: F3-9: ST-461	cc461	60	166	8	108	108	1	0.968	-	0.892	25	3
27915	M13 240023	2013	B	B: P1.19-3,15: F4-1: ST-35	cc35	6	2	1	4	4	1	0.96	-	0.861	2	1
27916	M13 240029	2013	B	B: P1.22,14: F5-5: ST-213	cc213	36	279	8	757	628	1	0.923	-	0.903	1	5
27917	M13 240030	2013	B	B: P1.22,9: F5-12: ST-10708	cc269	38	11	3	13	13	1	0.937	-	0.88	3	1
27918	M13 240031	2013	B	B: P1.18-3,1: F5-2: ST-337	cc41/44	9	112	1	72	19	2	-	0.888	-	1	1
27919	M13 240032	2013	B	B: P1.19-3,15: F4-1: ST-35	cc35	6	2	1	4	4	1	0.96	-	0.861	2	1
27920	M13 240033	2013	B	B: P1.22,9: F5-12: ST-1161	cc269	38	11	3	13	13	1	0.937	-	0.88	3	1
27921	M13 240036	2013	B	B: P1.22,9: F-ND: ST-10709	Unassigned	38	11	3	13	13	1	0.937	-	0.88	3	1
27922	M13 240039	2013	B	B: P1.19,13: F4-12: ST-479	cc269	8	120	4	15	15	1	0.859	-	0.916	4	2
27923	M13 240040	2013	B	B: P1.19,13: F4-12: ST-479	cc269	8	120	4	15	15	1	0.859	-	0.916	4	2
27924	M13 240041	2013	B	B: P1.7-2,4: F1-5: ST-10710	cc41/44	9	13	1	14	14	1	0.917	-	0.907	7	1
27925	M13 240042	2013	B	B: P1.19,15: F3-7: ST-8006	Unassigned	83	321	1	16	16	2	-	0.881	-	1	1
27926	M13 240043	2013	B	B: P1.22,9: F5-1: ST-1195	cc269	8	120	4	15	15	1	0.859	-	0.916	4	2
27927	M13 240045	2013	B	B: P1.19-2,13-1: F3-9: ST-1946	cc461	192	11	3	68	13	1	0.937	-	0.88	3	1
27928	M13 240046	2013	B	B: P1.22,9: F3-1: ST-275	cc269	38	30	1	19	19	2	-	0.888	-	1	1
27929	M13 240047	2013	B	B: P1.22,14-6: F1-5: ST-8054	cc41/44	26	13	1	14	14	1	0.917	-	0.907	7	1
27930	M13 240048	2013	B	B: P1.22,9: F5-12: ST-1161	cc269	38	11	3	13	13	1	0.937	-	0.88	3	1
27931	M13 240051	2013	B	B: P1.18-1,1: F5-1: ST-479	cc269	8	229	18	588	506	2	-	0.854	-	5	2
27932	M13 240054	2013	B	B: P1.17,16-3: F5-1: ST-1774	cc269	14	120	4	149	143	3	-	0.965	-	4	2
27933	M13 240057	2013	B	B: P1.7,30: F3-9: ST-5983	cc461	5	127	2	71	47	3	-	0.961	-	1	1
27934	M13 240063	2013	B	B: P1.19-2,13-1: F3-9: ST-461	cc461	60	166	8	108	108	1	0.968	-	0.892	25	3
27935	M13 240067	2013	B	B: P1.22,9: F5-12: ST-275	cc269	38	120	4	15	15	1	0.859	-	0.916	4	2
27936	M13 240069	2013	B	B: P1.22,9: F4-1: ST-1161	cc269	38	11	3	13	13	1	0.937	-	0.88	3	1
27937	M13 240072	2013	B	B: P1.22,14: F5-1: ST-269	cc269	8	120	4	15	15	1	0.859	-	0.916	10	2
27938	M13 240074	2013	B	B: P1.19-2,13-1: F3-9: ST-461	cc461	60	127	2	655	187	3	-	0.98	-	1	1
27939	M13 240075	2013	B	B: P1.22,9: F5-5: ST-7196	Unassigned	15	30	1	19	19	2	-	0.888	-	1	1
27940	M13 240076	2013	B	B: P1.17-6,23: F3-6: ST-10711	Unassigned	263	322	1	98	90	1	0.903	-	0.911	29	2
27941	M13 240078	2013	B	B: P1.19-2,13-2: F3-9: ST-1946	cc461	192	127	2	71	47	3	-	0.961	-	1	1
27942	M13 240081	2013	B	B: P1.22,14: F5-5: ST-9194	cc213	36	1	1	65	45	3	-	1	-	8	1
27943	M13 240084	2013	B	B: P1.7-2,4: F5-8: ST-1475	cc41/44	9	323	1	14	14	1	0.917	-	0.907	18	1
27944	M13 240085	2013	B	B: P1.7,30: F1-5: ST-40	cc41/44	9	208	17	220	167	3	-	0.95	-	8	1
27945	M13 240086	2013	B	B: P1.21,16: F5-5: ST-1434	Unassigned	62	233	1	16	16	2	-	0.881	-	1	4
27946	M13 240088	2013	B	B: P1.7-2,4: F1-5: ST-41	cc41/44	9	10	1	4	4	1	0.96	-	0.861	2	1
27947	M13 240090	2013	B	B: P1.7-2,4: F1-5: ST-6761	cc41/44	3	195	9	281	14	1	0.917	-	0.907	5	1
27948	M13 240091	2013	B	B: P1.22,14: F5-9: ST-162	cc162	26	30	1	21	21	2	-	0.854	-	1	1
27949	M13 240095	2013	B	B: P1.19-1,15-11: F5-1: ST-1049	cc269	8	120	4	15	15	1	0.859	-	0.916	4	2
27950	M13 240097	2013	B	B: P1.17-1,23-2: F3-7: ST-3893	cc41/44	9	149	1	16	16	2	-	0.881	-	1	1
27951	M13 240098	2013	B	B: P1.19,15: F1-5: ST-1097	cc41/44	9	10	1	356	302	2	-	0.885	-	24	1
27952	M13 240105	2013	B	B: P1.7-12,14: F1-7: ST-1572	Unassigned	9	11	3	13	13	1	0.937	-	0.88	3	1
27953	M13 240106	2013	B	B: P1.7,16: F3-3: ST-32	cc32	6	3	5	1	1	1	1	-	0.861	6	7
27954	M13 240111	2013	B	B: P1.18-1,14: F1-5: ST-1194	cc41/44	11	10	1	4	4	1	0.96	-	0.861	2	1
27955	M13 240112	2013	B	B: P1.22,14: F5-1: ST-269	cc269	8	120	4	15	15	1	0.859	-	0.916	10	2
27956	M13 240115	2013	B	B: P1.18-4,25: F1-5: ST-1194	cc41/44	11	10	1	9	9	1	0.926	-	0.9	50	1
27957	M13 240118	2013	B	B: P1.19-5,15: F5-1: ST-34	cc32	5	3	5	1	1	1	1	-	0.861	6	3
27958	M13 240120	2013	B	B: P1.7-2,4: F1-5: ST-41	cc41/44	9	113	6	4	4	1	0.96	-	0.861	2	1
27959	M13 240121	2013	B	B: P1.22,9: F5-12: ST-1161	cc269	38	11	3	13	13	1	0.937	-	0.88	3	1
27960	M13 240123	2013	B	B: P1.7-2,4-15: F1-5: ST-41	cc41/44	9	113	6	4	4	1	0.96	-	0.861	2	1
27961	M13 240124	2013	B	B: P1.22,9: F5-12: ST-1161	cc269	38	11	3	13	13	1	0.937	-	0.88	3	1
27962	M13 240125	2013	B	B: P1.5-1,10-4: F3-35: ST-1802	cc282	6	115	22	193	202	2	-	0.862	-	1	1
27963	M13 240127	2013	B	B: P1.22,14: F5-5: ST-213	cc213	36	238	9	205	187	3	-	0.98	-	5	1
27964	M13 240130	2013	B	B: P1.19,15: F5-1: ST-749	cc32	6	3	5	1	1	1	1	-	0.861	6	3
27965	M13 240132	2013	B	B: P1.22,14: F5-5: ST-213	cc213	36	125	1	65	45	3	-	1	-	8	1
27966	M13 240135	2013	B	B: P1.18-4,25: F1-5: ST-1194	cc41/44	11	10	1	9	9	1	0.926	-	0.9	50	1
27967	M13 240142	2013	B	B: P1.17,16-3: F1-20: ST-1770	cc41/44	9	14	11	24	24	2	-	0.854	-	1	1
27968	M13 240143	2013	B	B: P1.7-2,4: F5-9: ST-9293	cc162	26	30	1	21	21	2	-	0.854	-	1	1
27969	M13 240145	2013	B	B: P1.5-1,10-1: F5-12: ST-282	cc282	2	47	12	69	84	3	-	0.965	-	13	1
27970	M13 240147	2013	B	B: P1.22,3: F5-1: ST-10712	cc269	8	120	4	15	15	1	0.859	-	0.916	4	2
27971	M13 240148	2013	B	B: P1.12-1,13-1: F1-17: ST-10713	Unassigned	58	8	1	13	13	1	0.937	-	0.88	3	1
27972	M13 240150	2013	B	B: P1.22,9: F5-12: ST-10714	Unassigned	38	30	1	19	19	2	-	0.888	-	1	1
27973	M13 240153	2013	B	B: P1.21,16: F1-7: ST-9327	cc60	3	8	1	13	13	1	0.937	-	0.88	3	1
27974	M13 240157	2013	B	B: P1.7-2,4: F5-8: ST-41	cc41/44	9	10	1	4	4	1	0.96	-	0.861	2	1
27975	M13 240160	2013	B	B: P1.19-1,15-11: F5-1: ST-269	cc269	8	324	35	15	15	1	0.859	-	0.916	4	2
27976	M13 240161	2013	B	B: P1.22-1,14: F4-1: ST-35	cc35	6	233	1	16	16	2	-	0.881	-	1	4
27977	M13 240164	2013	B	B: P1.19-1,3-5: F5-1: ST-269	cc269	8	120	4	15	15	1	0.859	-	0.916	4	2
27978	M13 240166	2013	B	B: P1.18-1,14: F1-5: ST-1194	cc41/44	11	10	1	4	4	1	0.96	-	0.861	2	1
27979	M13 240167	2013	B	B: P1.19-1,15-11: F5-1: ST-269	cc269	8	120	4	15	15	1	0.859	-	0.916	4	2
27980	M13 240170	2013	B	B: P1.22,14: F1-7: ST-575	cc213	82	8	1	13	13	1	0.937	-	0.88	3	1
27981	M13 240171	2013	B	B: P1.7-2,4: F1-5: ST-5357	cc41/44	9	113	6	4	4	1	0.96	-	0.861	2	1
27982	M13 240172	2013	B	B: P1.22,9: F5-12: ST-275	cc269	38	30	1	19	19	2	-	0.888	-	1	1
27983	M13 240173	2013	B	B: P1.22,14-10: F1-5: ST-4256	cc41/44	9	325	2	52	66	1	0.96	-	0.873	86	1
27984	M13 240174	2013	B	B: P1.7-2,4: F5-8: ST-2203	cc41/44	11	13	1	122	14	1	0.917	-	0.907	7	1
27985	M13 240175	2013	B	B: P1.7-1,1: F1-14: ST-10535	cc41/44	9	197	1	16	16	2	-	0.881	-	1	1
27986	M13 240181	2013	B	B: P1.7-2,4: F1-5: ST-41	cc41/44	9	113	6	4	4	1	0.96	-	0.861	2	1
27987	M13 240183	2013	B	B: P1.19,15: F5-1: ST-5151	Unassigned	6	3	5	1	1	1	1	-	0.861	6	3
27988	M13 240187	2013	B	B: P1.22,14: F5-5: ST-213	cc213	36	125	1	65	45	3	-	1	-	14	1
27989	M13 240191	2013	B	B: P1.19,15: F1-5: ST-1163	cc269	3	30	1	19	19	2	-	0.888	-	1	1
27990	M13 240192	2013	B	B: P1.22,9: F5-12: ST-275	cc269	38	30	1	19	19	2	-	0.888	-	1	1
27991	M13 240197	2013	B	B: P1.22,9: F5-12: ST-9829	cc269	38	11	3	13	13	1	0.937	-	0.88	3	1
27992	M13 240199	2013	B	B: P1.5-1,10-8: F4-1: ST-11	cc11	8	105	7	92	95	2	-	0.854	-	5	1
27993	M13 240202	2013	B	B: P1.22,9: F1-10: ST-7143	Unassigned	38	11	3	13	13	1	0.937	-	0.88	3	1
27994	M13 240204	2013	B	B: P1.18-1,3: F1-5: ST-1194	cc41/44	11	326	36	724	608	1	0.956	-	0.857	2	1
27995	M13 240205	2013	B	B: P1.12-1,16: F1-5: ST-485	cc41/44	8	10	1	4	4	1	0.96	-	0.861	2	1
27996	M13 240206	2013	B	B: P1.22,14-6: F1-5: ST-207	cc41/44	9	10	1	19	19	2	-	0.888	-	1	1
27997	M13 240207	2013	B	B: P1.22,9: F5-12: ST-1161	cc269	38	11	3	13	13	1	0.937	-	0.88	3	1
27998	M13 240210	2013	B	B: P1.7-2,4: F1-5: ST-41	cc41/44	9	10	1	4	4	1	0.96	-	0.861	19	6
27999	M13 240211	2013	B	B: P1.22,9: F2-16: ST-5849	Unassigned	38	11	3	13	13	1	0.937	-	0.88	3	1
28000	M13 240212	2013	B	B: P1.17,16-3: F1-7: ST-3101	cc41/44	9	14	11	24	24	2	-	0.854	-	1	1
28001	M13 240213	2013	B	B: P1.22,9: F5-12: ST-275	cc269	38	11	3	13	13	1	0.937	-	0.88	3	1
28002	M13 240216	2013	B	B: P1.19,15: F5-1: ST-8049	cc32	6	3	5	1	1	1	1	-	0.861	6	3
28003	M13 240217	2013	B	B: P1.7-2,4: F1-5: ST-1194	cc41/44	11	10	1	4	4	1	0.96	-	0.861	2	1
28004	M13 240224	2013	B	B: P1.22,9: F5-12: ST-10715	Unassigned	38	11	3	13	13	1	0.937	-	0.88	3	1
28005	M13 240227	2013	B	B: P1.22,9: F5-12: ST-1161	cc269	38	11	3	13	13	1	0.937	-	0.88	3	1
28006	M13 240228	2013	B	B: P1.7-2,4: F3-3: ST-41	cc41/44	9	10	1	4	4	1	0.96	-	0.861	2	6
28007	M13 240229	2013	B	B: P1.7-2,16: F3-3: ST-1096	cc32	6	327	24	333	283	1	0.732	-	0.771	48	19
28009	M13 240231	2013	B	B: P1.7-2,4: F1-5: ST-8539	cc41/44	247	10	1	4	4	1	0.96	-	0.861	2	1
28010	M13 240232	2013	B	B: P1.22,15: F5-5: ST-213	cc213	36	328	23	712	603	3	-	0.98	-	27	1
28011	M13 240233	2013	B	B: P1.22,9: F5-12: ST-275	cc269	38	13	1	19	19	2	-	0.888	-	7	1
28012	M13 240234	2013	B	B: P1.7-2,4: F1-5: ST-41	cc41/44	9	113	6	4	4	1	0.96	-	0.861	2	1
28013	M13 240235	2013	B	B: P1.12-1,9: F-ND: ST-41	cc41/44	9	10	1	4	4	1	0.96	-	0.861	2	1
28014	M13 240237	2013	B	B: P1.7-2,4: F1-5: ST-41	cc41/44	9	10	1	4	4	1	0.96	-	0.861	19	6
28015	M13 240239	2013	B	B: P1.7-2,4: F1-5: ST-41	cc41/44	9	246	50	4	4	1	0.96	-	0.861	2	1
28016	M13 240245	2013	B	B: P1.22,14: F5-1: ST-269	cc269	8	120	4	15	15	1	0.859	-	0.916	10	2
28017	M13 240248	2013	B	B: P1.19-2,13-2: F3-9: ST-1946	cc461	192	127	2	858	690	1	0.892	-	0.923	1	1
28018	M13 240249	2013	B	B: P1.17-1,23: F3-6: ST-10716	cc213	36	125	1	65	45	3	-	1	-	8	1
28019	M13 240250	2013	B	B: P1.21,16: F3-6: ST-840	cc167	26	33	1	4	4	1	0.96	-	0.861	2	1
28020	M13 240255	2013	B	B: P1.22,9: F5-12: ST-1161	cc269	38	11	3	13	13	1	0.937	-	0.88	3	1
28021	M13 240256	2013	B	B: P1.22,9: F1-7: ST-1163	cc269	3	30	1	19	19	2	-	0.888	-	1	1
28022	M13 240257	2013	B	B: P1.22,9: F5-12: ST-1273	cc269	38	329	51	19	19	2	-	0.888	-	1	1
28023	M13 240258	2013	B	B: P1.22,14: F5-5: ST-10338	cc213	36	330	52	203	185	3	-	0.98	-	4	19
28024	M13 240261	2013	B	B: P1.7-2,4: F1-5: ST-41	cc41/44	9	113	6	4	4	1	0.96	-	0.861	2	1
28025	M13 240262	2013	B	B: P1.7,16-26: F3-3: ST-10717	cc32	6	331	28	373	316	3	-	0.935	-	27	23
28026	M13 240263	2013	B	B: P1.5-2,10-4: F3-3: ST-41	cc41/44	9	10	1	4	4	1	0.96	-	0.861	2	6
28027	M13 240264	2013	B	B: P1.21-7,10-26: F5-36: ST-1157	cc1157	21	11	3	68	13	1	0.937	-	0.88	3	1
28028	M13 240271	2013	B	B: P1.7-1,1: F1-14: ST-10718	cc41/44	9	197	1	570	494	3	-	0.931	-	87	1
28029	M13 240272	2013	B	B: P1.22,14: F5-9: ST-162	cc162	26	505	8	851	705	1	0.956	-	0.865	88	5
28030	M13 240273	2013	B	B: P1.18-4,25: F1-5: ST-1194	cc41/44	11	10	1	4	4	1	0.96	-	0.861	2	1
28031	M13 240274	2013	B	B: P1.19-1,15-11: F5-1: ST-1049	cc269	8	120	4	15	15	1	0.859	-	0.916	4	2
28032	M13 240275	2013	B	B: P1.7-2,4: F1-5: ST-41	cc41/44	9	10	1	4	4	1	0.96	-	0.861	2	1
28033	M13 240277	2013	B	B: P1.7-2,4: F1-5: ST-1823	cc41/44	9	332	11	852	327	1	0.913	-	0.903	1	1
28034	M13 240281	2013	B	B: P1.22,14: F5-5: ST-10719	cc213	36	333	2	323	276	1	0.956	-	0.88	26	1
28035	M13 240289	2013	B	B: P1.17-1,23: F1-7: ST-10720	cc269	8	9	2	192	200	2	-	0.846	-	1	1
28036	M13 240292	2013	B	B: P1.22,14-6: F1-5: ST-5330	Unassigned	3	13	1	14	14	1	0.917	-	0.907	1	1
28037	M13 240294	2013	B	B: P1.22,9: F5-5: ST-6791	cc269	38	30	1	19	19	2	-	0.888	-	18	1
28038	M13 240384	2013	B	B: P1.19-3,15: F5-8: ST-32	cc32	6	269	2	56	69	1	0.9	-	0.934	45	1
28039	M13 240385	2013	B	B: P1.7-2,4: F1-5: ST-8176	cc41/44	11	10	1	4	4	1	0.96	-	0.861	2	1
28040	M13 240386	2013	B	B: P1.22,9: F1-7: ST-1159	Unassigned	38	342	13	75	87	1	0.863	-	0.92	4	1
28041	M13 240397	2013	B	B: P1.7-2,13: F1-7: ST-1575	Unassigned	6	215	1	343	291	1	0.921	-	0.923	20	4
28042	M13 240400	2013	B	B: P1.17-1,23: F1-7: ST-269	cc269	8	120	4	15	15	1	0.859	-	0.916	4	2
28043	M13 240406	2013	B	B: P1.19-2,13-1: F3-9: ST-1946	cc461	192	127	2	71	47	3	-	0.961	-	1	1
28044	M13 240409	2013	B	B: P1.7-2,4: F1-5: ST-41	cc41/44	9	9	2	4	4	1	0.96	-	0.861	2	1
28045	M13 240411	2013	B	B: P1.19-1,30-1: F5-1: ST-283	cc269	8	120	4	15	15	1	0.859	-	0.916	4	2
28046	M13 240413	2013	B	B: P1.7-2,4: F1-5: ST-10721	cc41/44	9	10	1	4	4	1	0.96	-	0.861	2	1
28047	M13 240414	2013	B	B: P1.22,14: F5-9: ST-162	cc162	26	30	1	21	21	2	-	0.854	-	1	1
28048	M13 240417	2013	B	B: P1.5,2: F1-7: ST-1430	cc60	3	8	1	13	13	1	0.937	-	0.88	3	1
28049	M13 240418	2013	B	B: P1.7-1,1: F1-5: ST-46	cc41/44	3	10	1	4	4	1	0.96	-	0.861	2	1
28050	M13 240421	2013	B	B: P1.19-1,15-11: F5-1: ST-1049	cc269	8	120	4	15	15	1	0.859	-	0.916	4	2
28051	M13 240422	2013	B	B: P1.21,16: F5-12: ST-1163	cc269	3	30	1	19	19	2	-	0.888	-	1	1
28052	M13 240424	2013	B	B: P1.22,14: F3-7: ST-10722	Unassigned	58	18	1	36	37	1	0.937	-	0.847	1	1
28053	M13 240426	2013	B	B: P1.18-1,3: F5-12: ST-5849	Unassigned	38	11	3	13	13	1	0.937	-	0.88	3	1
28054	M13 240427	2013	B	B: P1.22,14: F5-5: ST-213	cc213	36	108	14	15	15	1	0.859	-	0.916	4	5
28055	M13 240428	2013	B	B: P1.21,16: F5-12: ST-275	cc269	38	35	2	25	25	2	-	0.85	-	1	1
28056	M13 240429	2013	B	B: P1.19-1,15-11: F5-1: ST-269	cc269	8	120	4	15	15	1	0.859	-	0.916	4	2
28057	M13 240434	2013	B	B: P1.19,15: F4-1: ST-254	cc254	3	11	3	13	13	1	0.937	-	0.88	3	1
28058	M13 240437	2013	B	B: P1.22,14: F5-5: ST-213	cc213	36	125	1	65	45	3	-	1	-	89	1
28059	M13 240438	2013	B	B: P1.7-1,1-1: F1-7: ST-7955	cc41/44	9	10	1	19	19	2	-	0.888	-	1	1
28060	M13 240448	2013	B	B: P1.18-1,1: F3-9: ST-103	cc103	5	35	2	25	25	2	-	0.85	-	1	1
28061	M13 240449	2013	B	B: P1.7-2,4: F1-18: ST-154	cc41/44	11	10	1	4	4	1	0.96	-	0.861	2	1
28062	M13 240450	2013	B	B: P1.22,9: F5-12: ST-1161	cc269	38	11	3	13	13	1	0.937	-	0.88	3	1
28063	M13 240451	2013	B	B: P1.22,14: F5-5: ST-3120	cc213	36	334	21	425	357	1	0.855	-	0.935	4	12
28064	M13 240452	2013	B	B: P1.7-2,4: F1-5: ST-41	cc41/44	9	10	1	4	4	1	0.96	-	0.861	2	1
28065	M13 240453	2013	B	B: P1.19-1,15-11: F5-1: ST-269	cc269	8	120	4	15	15	1	0.859	-	0.916	4	2
28066	M13 240455	2013	B	B: P1.22,9: F5-5: ST-275	cc269	38	30	1	19	19	2	-	0.888	-	1	1
28067	M13 240458	2013	B	B: P1.5-1,10-4: F3-9: ST-103	cc103	5	35	2	25	25	2	-	0.85	-	1	1
28068	M13 240461	2013	B	B: P1.22,9: F1-7: ST-1159	Unassigned	38	13	1	14	14	1	0.917	-	0.907	1	1
28069	M13 240463	2013	B	B: P1.22,9: F5-12: ST-1161	cc269	38	11	3	13	13	1	0.937	-	0.88	3	1
28070	M13 240466	2013	B	B: P1.22,9: F5-12: ST-275	cc269	38	11	3	13	13	1	0.937	-	0.88	3	1
28071	M13 240468	2013	B	B: P1.17,9: F5-9: ST-162	cc162	26	207	8	853	203	2	-	0.858	-	44	13
28072	M13 240472	2013	B	B: P1.7-2,4: F1-5: ST-41	cc41/44	9	335	53	4	4	1	0.96	-	0.861	2	1
28073	M13 240475	2013	B	B: P1.7-2,4: F1-7: ST-2080	cc41/44	9	203	6	19	19	2	-	0.888	-	1	1
28074	M13 240476	2013	B	B: P1.22,9: F5-12: ST-1161	cc269	38	11	3	13	13	1	0.937	-	0.88	3	1
28075	M13 240478	2013	B	B: P1.22,9: F5-12: ST-1161	cc269	38	11	3	13	13	1	0.937	-	0.88	3	1
28076	M13 240479	2013	B	B: P1.7-2,4: F1-5: ST-41	cc41/44	9	10	1	4	4	1	0.96	-	0.861	19	6
28077	M13 240481	2013	B	B: P1.22,14: F5-17: ST-10723	cc213	36	47	12	859	364	3	-	0.984	-	12	1
28078	M13 240483	2013	B	B: P1.22,9: F1-7: ST-10724	cc269	3	30	1	19	19	2	-	0.888	-	1	1
28079	M12 240345	2012	C	C: P1.18-1,3: F3-9: ST-5133	cc103	5	10	1	19	19	2	-	0.888	-	1	2
28080	M12 240639	2012	C	C: P1.5,2: F3-3: ST-11	cc11	8	1	1	22	22	2	-	0.854	-	1	1
28081	M12 240655	2012	C	C: P1.5,2-67: F1-7: ST-467	cc269	8	336	23	15	15	1	0.859	-	0.916	1	24
28082	M12 240679	2012	C	C: P1.5-1,10-8: F-ND: ST-11	cc11	8	183	6	13	13	1	0.937	-	0.88	16	1
28083	M12 240698	2012	C	C: P1.5-1,10-8: F3-6: ST-11	cc11	8	105	7	13	13	1	0.937	-	0.88	5	1
28084	M12 240716	2012	C	C: P1.5,2: F3-3: ST-11	cc11	8	1	1	22	22	2	-	0.854	-	1	1
28085	M12 240776	2012	C	C: P1.5-1,10-8: F3-6: ST-11	cc11	8	105	7	361	306	1	0.964	-	0.869	5	1
28086	M12 240854	2012	C	C: P1.21,16: F3-7: ST-1466	cc174	5	30	1	13	13	1	0.937	-	0.88	51	1
28087	M12 240855	2012	C	C: P1.21,16: F3-7: ST-1466	cc174	5	30	1	13	13	1	0.937	-	0.88	51	1
28088	M13 240002	2013	C	C: P1.18-1,34: F1-5: ST-9777	Unassigned	249	260	1	783	647	3	-	0.923	-	43	1
28089	M13 240008	2013	C	C: P1.5,2: F3-3: ST-11	cc11	8	1	1	22	22	2	-	0.854	-	1	1
28090	M13 240022	2013	C	C: P1.5-1,10-8: F4-1: ST-11	cc11	8	105	7	669	0	1	-	-	-	5	1
28091	M13 240026	2013	C	C: P1.7-11,30-8: F1-7: ST-467	cc269	8	120	4	15	15	1	0.859	-	0.916	4	2
28092	M13 240068	2013	C	C: P1.5,2: F3-3: ST-11	cc11	8	1	1	22	22	2	-	0.854	-	1	1
28093	M13 240155	2013	C	C: P1.5-1,10-8: F3-6: ST-11	cc11	8	105	7	13	13	1	0.937	-	0.88	5	1
28094	M13 240162	2013	C	C: P1.5-1,10-8: F3-6: ST-11	cc11	8	105	7	13	13	1	0.937	-	0.88	5	1
28095	M13 240189	2013	C	C: P1.5-1,10-8: F-ND: ST-11	cc11	8	183	6	13	13	1	0.937	-	0.88	16	1
28096	M13 240201	2013	C	C: P1.18-1,3: F3-9: ST-5315	Unassigned	5	10	1	19	19	2	-	0.888	-	1	2
28097	M13 240254	2013	C	C: P1.5-1,10-8: F3-6: ST-11	cc11	8	105	7	13	13	1	0.937	-	0.88	5	1
28098	M13 240280	2013	C	C: P1.5-1,10-8: F-ND: ST-11	cc11	8	105	7	82	78	1	0.964	-	0.869	5	1
28099	M13 240282	2013	C	C: P1.5-1,10-8: F3-6: ST-11	cc11	8	105	7	13	13	1	0.937	-	0.88	5	1
28100	M13 240295	2013	C	C: P1.5-1,10-8: F3-6: ST-11	cc11	8	105	7	13	13	1	0.937	-	0.88	5	1
28101	M13 240398	2013	C	C: P1.18-1,3: F3-9: ST-5133	cc103	5	337	2	15	15	1	0.859	-	0.916	4	2
28102	M13 240401	2013	C	C: P1.5,2: F3-3: ST-11	cc11	8	1	1	22	22	2	-	0.854	-	1	1
28103	M13 240402	2013	C	C: P1.5-1,10-8: F3-6: ST-11	cc11	8	105	7	13	13	1	0.937	-	0.88	5	1
28104	M13 240405	2013	C	C: P1.5-1,10-8: F3-6: ST-11	cc11	8	105	7	854	208	1	0.917	-	0.876	5	1
28105	M13 240440	2013	C	C: P1.5-1,10-8: F3-6: ST-11	cc11	8	105	7	13	13	1	0.937	-	0.88	5	1
28106	M13 240460	2013	C	C: P1.5,2: F3-3: ST-11	cc11	8	1	1	22	22	2	-	0.854	-	1	1
28107	M12 240641	2012	NG	NG: P1.21-7,16: F5-36: ST-10301	cc1157	21	11	3	68	13	1	0.937	-	0.88	3	1
28108	M12 240756	2012	NG	NG: P1.22,9: F5-12: ST-6604	cc269	38	11	3	13	13	1	0.937	-	0.88	3	1
28109	M13 240134	2013	NG	NG: P1.18,25-14: F-ND: ST-823	cc198	30	126	1	66	4	1	0.96	-	0.861	1	1
28110	M13 240198	2013	NG	NG: P1.5-2,10-4: F3-3: ST-10725	cc41/44	9	10	1	4	4	1	0.96	-	0.861	2	6
28111	M13 240240	2013	NG	NG: P1.22,14: F5-5: ST-213	cc213	36	37	1	13	13	1	0.937	-	0.88	3	1
28112	M13 240399	2013	NG	NG: P1.7,30: F1-5: ST-41	cc41/44	9	10	1	4	4	1	0.96	-	0.861	2	6
28113	M13 240410	2013	NG	NG: P1.21-7,16-134: F5-36: ST-1157	cc1157	21	11	3	68	13	1	0.937	-	0.88	3	1
28114	M12 240337	2012	W	W: P1.5-1,10-4: F1-1: ST-11	cc11	8	10	1	22	22	2	-	0.854	-	1	1
28115	M12 240640	2012	W	W: P1.5,2: F1-1: ST-11	cc11	8	10	1	22	22	2	-	0.854	-	1	1
28116	M12 240657	2012	W	W: P1.5,2: F1-1: ST-11	cc11	8	10	1	22	22	2	-	0.854	-	1	1
28117	M12 240663	2012	W	W: P1.7-2,14: F1-1: ST-11	cc11	8	10	1	22	22	2	-	0.854	-	1	1
28118	M12 240671	2012	W	W: P1.18-1,3: F3-9: ST-184	cc22	11	9	2	16	16	2	-	0.881	-	1	1
28119	M12 240702	2012	W	W: P1.5,2: F1-5: ST-11	cc11	8	10	1	22	22	2	-	0.854	-	1	1
28120	M12 240734	2012	W	W: P1.18-1,3: F4-1: ST-1286	cc22	11	234	11	74	16	2	-	0.881	-	22	1
28121	M12 240751	2012	W	W: P1.5,2: F1-1: ST-10651	cc11	8	10	1	22	22	2	-	0.854	-	1	1
28122	M12 240754	2012	W	W: P1.5,2: F1-1: ST-11	cc11	8	10	1	22	22	2	-	0.854	-	1	1
28123	M12 240762	2012	W	W: P1.18-1,3: F4-1: ST-184	cc22	11	9	2	16	16	2	-	0.881	-	1	1
28124	M12 240772	2012	W	W: P1.18-1,3: F4-1: ST-22	cc22	11	9	2	16	16	2	-	0.881	-	1	1
28125	M12 240774	2012	W	W: P1.5,2: F1-1: ST-11	cc11	8	10	1	22	22	2	-	0.854	-	1	1
28126	M12 240789	2012	W	W: P1.18-1,3: F1-2: ST-184	cc22	11	9	2	16	16	2	-	0.881	-	1	1
28127	M12 240823	2012	W	W: P1.5-1,10-1: F4-1: ST-1286	cc22	11	9	2	16	16	2	-	0.881	-	1	1
28128	M12 240826	2012	W	W: P1.5,2: F1-1: ST-11	cc11	8	10	1	22	22	2	-	0.854	-	1	1
28129	M12 240862	2012	W	W: P1.5-1,10-4: F4-1: ST-1281	cc22	11	9	2	16	16	2	-	0.881	-	1	1
28130	M12 240881	2012	W/Y	W/Y: P1.5-1,10-1: F4-1: ST-1655	cc23	11	35	2	25	25	2	-	0.85	-	1	1
28131	M12 240895	2012	W	W: P1.5,2: F1-1: ST-11	cc11	8	10	1	22	22	2	-	0.854	-	1	1
28132	M12 240898	2012	W	W: P1.5,2: F1-1: ST-11	cc11	8	10	1	22	22	2	-	0.854	-	1	1
28133	M13 240013	2013	W	W: P1.18-1,3: F4-1: ST-1286	cc22	11	234	11	74	16	2	-	0.881	-	22	1
28134	M13 240015	2013	W	W: P1.5,2: F1-1: ST-11	cc11	8	10	1	22	22	2	-	0.854	-	1	1
28135	M13 240025	2013	W	W: P1.5,2: F1-1: ST-11	cc11	8	10	1	22	22	2	-	0.854	-	1	1
28136	M13 240028	2013	W	W: P1.5,2: F1-1: ST-11	cc11	8	10	1	22	22	2	-	0.854	-	1	1
28137	M13 240056	2013	W	W: P1.5,2: F1-1: ST-11	cc11	8	10	1	22	22	2	-	0.854	-	1	1
28138	M13 240066	2013	W	W: P1.5,2: F1-1: ST-11	cc11	8	10	1	22	22	2	-	0.854	-	1	1
28139	M13 240077	2013	W	W: P1.5,2: F1-1: ST-10651	cc11	8	10	1	22	22	2	-	0.854	-	1	1
28140	M13 240089	2013	W	W: P1.18-1,3: F3-9: ST-184	cc22	11	9	2	16	16	2	-	0.881	-	1	1
28141	M13 240109	2013	W	W: P1.5,2: F1-1: ST-11	cc11	8	10	1	22	22	2	-	0.854	-	1	1
28142	M13 240114	2013	W	W: P1.5,2: F1-146: ST-11	cc11	8	10	1	22	22	2	-	0.854	-	1	1
28143	M13 240158	2013	W	W: P1.5,2: F1-1: ST-11	cc11	8	10	1	22	22	2	-	0.854	-	1	1
28144	M13 240168	2013	W	W: P1.5,2: F1-1: ST-11	cc11	8	10	1	22	22	2	-	0.854	-	1	1
28145	M13 240176	2013	W	W: P1.18-1,3: F1-2: ST-22	cc22	11	9	2	16	16	2	-	0.881	-	1	1
28146	M13 240185	2013	W	W: P1.5,2: F1-1: ST-10651	cc11	8	10	1	22	22	2	-	0.854	-	1	1
28147	M13 240223	2013	W	W: P1.5,2: F1-1: ST-11	cc11	8	10	1	22	22	2	-	0.854	-	1	1
28148	M13 240225	2013	W	W: P1.5,2: F1-1: ST-10651	cc11	8	10	1	22	22	2	-	0.854	-	1	1
28149	M13 240238	2013	W	W: P1.5,2: F1-1: ST-11	cc11	8	10	1	22	22	2	-	0.854	-	1	1
28150	M13 240246	2013	W	W: P1.5,2: F1-1: ST-11	cc11	8	10	1	22	22	2	-	0.854	-	1	1
28151	M13 240247	2013	W	W: P1.5,2: F1-1: ST-11	cc11	8	10	1	22	22	2	-	0.854	-	1	1
28152	M13 240251	2013	W	W: P1.5,2: F1-1: ST-11	cc11	8	10	1	22	22	2	-	0.854	-	1	1
28153	M13 240269	2013	W	W: P1.5,2: F1-1: ST-11	cc11	8	10	1	22	22	2	-	0.854	-	1	1
28154	M13 240283	2013	W	W: P1.5,2: F1-1: ST-11	cc11	8	10	1	22	22	2	-	0.854	-	1	1
28155	M13 240431	2013	W	W: P1.18-1,16: F1-5: ST-10726	cc22	11	338	2	16	16	2	-	0.881	-	1	1
28156	M13 240436	2013	W	W: P1.5,2: F1-1: ST-11	cc11	8	10	1	22	22	2	-	0.854	-	1	1
28157	M13 240446	2013	W	W: P1.5,2: F1-1: ST-11	cc11	8	10	1	22	22	2	-	0.854	-	1	1
28158	M13 240457	2013	W	W: P1.5,2: F1-1: ST-11	cc11	8	10	1	22	22	2	-	0.854	-	1	1
28159	M13 240464	2013	W	W: P1.21,16: F1-1: ST-11	cc11	8	10	1	22	22	2	-	0.854	-	1	1
28160	M13 240465	2013	W	W: P1.18-1,3: F3-9: ST-184	cc22	11	9	2	16	16	2	-	0.881	-	1	1
28161	M13 240467	2013	W	W: P1.5,2: F1-1: ST-11	cc11	8	10	1	22	22	2	-	0.854	-	1	1
28162	M13 240469	2013	W	W: P1.5,2: F1-1: ST-11	cc11	8	339	2	1	1	1	1	-	0.861	6	1
28163	M13 240473	2013	W	W: P1.5,2: F1-1: ST-11	cc11	8	10	1	22	22	2	-	0.854	-	1	1
28164	M13 240482	2013	W	W: P1.5,2: F1-1: ST-11	cc11	8	10	1	22	22	2	-	0.854	-	1	1
28165	M12 240342	2012	Y	Y: P1.5-1,10-4: F4-1: ST-23	cc23	11	35	2	25	25	2	-	0.85	-	1	1
28166	M12 240343	2012	Y	Y: P1.5-1,10-1: F4-1: ST-1655	cc23	11	35	2	25	25	2	-	0.85	-	1	1
28167	M12 240643	2012	Y	Y: P1.5-1,10-1: F4-1: ST-1655	cc23	11	35	2	25	25	2	-	0.85	-	1	1
28168	M12 240646	2012	Y	Y: P1.5-1,10-37: F4-1: ST-1655	cc23	11	35	2	25	25	2	-	0.85	-	1	1
28169	M12 240661	2012	Y	Y: P1.5-2,10-1: F5-12: ST-23	cc23	11	35	2	25	25	2	-	0.85	-	1	1
28170	M12 240701	2012	Y	Y: P1.5-1,10-4: F4-1: ST-23	cc23	11	35	2	25	25	2	-	0.85	-	1	1
28171	M12 240713	2012	Y	Y: P1.5-1,10-1: F4-1: ST-1655	cc23	11	35	2	25	25	2	-	0.85	-	1	1
28172	M12 240715	2012	Y	Y: P1.5-2,10-1: F4-1: ST-23	cc23	11	35	2	25	25	2	-	0.85	-	1	1
28173	M12 240717	2012	Y	Y: P1.22,9: F3-7: ST-1466	cc174	5	30	1	21	21	2	-	0.854	-	1	1
28174	M12 240728	2012	Y	Y: P1.5-1,10-4: F4-1: ST-23	cc23	11	13	1	14	14	1	0.917	-	0.907	1	1
28175	M12 240746	2012	Y	Y: P1.5-2,10-2: F4-1: ST-3030	cc23	11	8	1	4	4	1	0.96	-	0.861	2	1
28176	M12 240748	2012	Y	Y: P1.18-1,3: F5-12: ST-103	cc103	5	35	2	25	25	2	-	0.85	-	1	1
28177	M12 240760	2012	Y	Y: P1.5-1,10-1: F4-1: ST-1655	cc23	11	35	2	25	25	2	-	0.85	-	1	1
28178	M12 240767	2012	Y	Y: P1.5-1,10-10: F4-1: ST-1655	cc23	11	35	2	25	25	2	-	0.85	-	1	1
28179	M12 240779	2012	Y	Y: P1.5-1,10-10: F4-1: ST-1655	cc23	11	35	2	25	25	2	-	0.85	-	1	1
28180	M12 240784	2012	Y	Y: P1.7-2,13-15: F3-7: ST-1466	cc174	5	30	1	21	21	2	-	0.854	-	1	1
28181	M12 240788	2012	Y	Y: P1.5-1,10-4: F4-1: ST-10294	cc23	11	35	2	25	25	2	-	0.85	-	1	1
28182	M12 240791	2012	Y	Y: P1.5-1,10-1: F4-1: ST-1655	cc23	11	35	2	25	25	2	-	0.85	-	1	1
28183	M12 240796	2012	Y	Y: P1.5-1,10-10: F3-6: ST-10727	cc167	1	48	10	23	23	2	-	0.858	-	1	1
28184	M12 240797	2012	Y	Y: P1.5-1,10-4: F3-4: ST-10728	cc167	9	48	10	24	24	2	-	0.854	-	1	1
28185	M12 240799	2012	Y	Y: P1.5-1,2-2: F5-8: ST-23	cc23	11	35	2	25	25	2	-	0.85	-	1	1
28186	M12 240801	2012	Y	Y: P1.5-1,10-1: F4-1: ST-1655	cc23	11	35	2	25	25	2	-	0.85	-	1	1
28187	M12 240802	2012	Y	Y: P1.18-1,3: F3-6: ST-114	cc22	11	340	15	15	15	1	0.859	-	0.916	4	5
28188	M12 240816	2012	Y	Y: P1.5-1,2-2: F5-8: ST-23	cc23	11	35	2	25	25	2	-	0.85	-	1	1
28189	M12 240821	2012	Y	Y: P1.5-1,10-1: F4-1: ST-10729	cc167	9	48	10	23	23	2	-	0.858	-	1	1
28190	M12 240822	2012	Y	Y: P1.5-1,2-28: F5-8: ST-23	cc23	11	35	2	25	25	2	-	0.85	-	1	1
28191	M12 240840	2012	Y	Y: P1.5-1,2-2: F5-8: ST-23	cc23	11	35	2	25	25	2	-	0.85	-	1	1
28192	M12 240857	2012	Y	Y: P1.5-1,10-4: F4-1: ST-1655	cc23	11	35	2	25	25	2	-	0.85	-	1	1
28193	M12 240885	2012	Y	Y: P1.5-1,10-1: F4-1: ST-1655	cc23	11	35	2	25	25	2	-	0.85	-	1	1
28194	M12 240886	2012	Y	Y: P1.5-1,2-2: F5-8: ST-23	cc23	11	35	2	25	25	2	-	0.85	-	1	1
28195	M12 240888	2012	Y	Y: P1.5-2,10-1: F4-1: ST-23	cc23	11	35	2	25	25	2	-	0.85	-	1	1
28196	M12 240894	2012	Y	Y: P1.5-1,10-1: F4-1: ST-1655	cc23	11	35	2	25	25	2	-	0.85	-	1	1
28197	M12 240897	2012	Y	Y: P1.5-2,10-2: F2-13: ST-23	cc23	11	332	11	104	104	2	-	0.846	-	52	1
28198	M13 240011	2013	Y	Y: P1.5-1,10-4: F4-1: ST-1655	cc23	11	35	2	25	25	2	-	0.85	-	1	1
28199	M13 240020	2013	Y	Y: P1.5-1,10-4: F3-6: ST-114	cc22	11	9	2	16	16	2	-	0.881	-	1	1
28200	M13 240035	2013	Y	Y: P1.5-1,10-1: F4-1: ST-1655	cc23	11	35	2	25	25	2	-	0.85	-	1	1
28201	M13 240044	2013	Y	Y: P1.5-1,10-1: F4-1: ST-1655	cc23	11	35	2	25	25	2	-	0.85	-	1	1
28202	M13 240053	2013	Y	Y: P1.5-1,10-4: F3-4: ST-10730	cc167	9	48	10	24	24	2	-	0.854	-	1	1
28203	M13 240055	2013	Y	Y: P1.18-1,3: F3-6: ST-114	cc22	11	9	2	16	16	2	-	0.881	-	1	1
28204	M13 240059	2013	Y	Y: P1.5-1,10-4: F3-4: ST-10728	cc167	9	48	10	24	24	2	-	0.854	-	1	1
28205	M13 240064	2013	Y	Y: P1.5-1,10-12: F4-1: ST-1655	cc23	11	35	2	25	25	2	-	0.85	-	1	1
28206	M13 240073	2013	Y	Y: P1.5-2,10-1: F4-1: ST-23	cc23	11	35	2	25	25	2	-	0.85	-	1	1
28207	M13 240087	2013	Y	Y: P1.5-1,10-1: F4-1: ST-1655	cc23	11	35	2	25	25	2	-	0.85	-	1	1
28208	M13 240099	2013	Y	Y: P1.5-1,10-1: F4-1: ST-1655	cc23	11	35	2	25	25	2	-	0.85	-	1	1
28209	M13 240102	2013	Y	Y: P1.5-1,10-1: F4-1: ST-1655	cc23	11	35	2	25	25	2	-	0.85	-	1	1
28210	M13 240116	2013	Y	Y: P1.5-1,10-1: F4-1: ST-1655	cc23	11	35	2	25	25	2	-	0.85	-	1	1
28211	M13 240126	2013	Y	Y: P1.5-1,10-4: F3-4: ST-3980	cc167	9	105	7	92	95	2	-	0.854	-	5	1
28212	M13 240131	2013	Y	Y: P1.5-2,10-1: F4-1: ST-23	cc23	11	35	2	25	25	2	-	0.85	-	1	1
28213	M13 240136	2013	Y	Y: P1.5-1,10-4: F4-1: ST-168	cc167	9	48	10	23	23	2	-	0.858	-	1	1
28214	M13 240144	2013	Y	Y: P1.5-1,10-10: F4-1: ST-1655	cc23	11	35	2	25	25	2	-	0.85	-	1	1
28215	M13 240146	2013	Y	Y: P1.5-1,10-1: F4-1: ST-1655	cc23	11	35	2	25	25	2	-	0.85	-	1	1
28216	M13 240154	2013	Y	Y: P1.5-1,10-1: F4-1: ST-1655	cc23	11	35	2	25	25	2	-	0.85	-	1	1
28217	M13 240165	2013	Y	Y: P1.5-1,10-1: F4-1: ST-1655	cc23	11	35	2	25	25	2	-	0.85	-	1	1
28218	M13 240184	2013	Y	Y: P1.5,2: F4-1: ST-1655	cc23	11	35	2	25	25	2	-	0.85	-	1	1
28219	M13 240188	2013	Y	Y: P1.5-1,10-4: F4-1: ST-1655	cc23	11	35	2	25	25	2	-	0.85	-	1	1
28220	M13 240194	2013	Y	Y: P1.5-1,10-1: F4-1: ST-1655	cc23	11	35	2	25	25	2	-	0.85	-	1	1
28221	M13 240200	2013	Y	Y: P1.5-1,10-1: F4-1: ST-1655	cc23	11	35	2	25	25	2	-	0.85	-	1	1
28222	M13 240203	2013	Y	Y: P1.5-2,10-1: F-ND: ST-23	cc23	11	35	2	25	25	2	-	0.85	-	1	1
28223	M13 240218	2013	Y	Y: P1.5-1,10-1: F4-1: ST-1655	cc23	11	35	2	25	25	2	-	0.85	-	1	1
28224	M13 240220	2013	Y	Y: P1.5-1,10-1: F4-1: ST-1655	cc23	11	30	1	106	106	2	-	0.877	-	1	1
28225	M13 240226	2013	Y	Y: P1.18-1,3: F3-4: ST-3015	Unassigned	11	9	2	16	16	2	-	0.881	-	1	1
28226	M13 240242	2013	Y	Y: P1.5-2,10-2: F2-13: ST-23	cc23	11	332	11	104	104	2	-	0.846	-	52	1
28227	M13 240244	2013	Y	Y: P1.5-1,10-1: F4-1: ST-1655	cc23	11	35	2	25	25	2	-	0.85	-	1	1
28228	M13 240265	2013	Y	Y: P1.5-1,10-4: F4-1: ST-1655	cc23	11	35	2	25	25	2	-	0.85	-	1	1
28229	M13 240267	2013	Y	Y: P1.5-1,10-1: F4-1: ST-1655	cc23	11	35	2	25	25	2	-	0.85	-	1	1
28230	M13 240268	2013	Y	Y: P1.5-2,10-1: F4-1: ST-10732	cc23	11	35	2	25	25	2	-	0.85	-	1	-
28231	M13 240381	2013	Y	Y: P1.5-1,10-4: F4-1: ST-23	cc23	11	35	2	25	25	2	-	0.85	-	1	1
28232	M13 240383	2013	Y	Y: P1.5-2,10-1: F5-8: ST-3342	cc865	8	9	2	855	706	1	0.917	-	0.907	1	1
28233	M13 240396	2013	Y	Y: P1.7-2,13-1: F4-1: ST-4446	cc23	317	35	2	25	25	2	-	0.85	-	1	1
28234	M13 240407	2013	Y	Y: P1.5-1,10-1: F4-1: ST-1655	cc23	11	35	2	25	25	2	-	0.85	-	1	1
28235	M13 240439	2013	Y	Y: P1.5-1,10-1: F4-1: ST-1655	cc23	11	35	2	25	25	2	-	0.85	-	1	1
29721	M13 240491	2013	W	W: P1.5,2: F1-1: ST-11	cc11	8	10	1	22	22	2	-	0.854	-	1	1
29723	M13 240555	2013	W	W: P1.5,2: F1-1: ST-11	cc11	8	120	4	933	767	2	-	0.862	-	4	2
29724	M13 240591	2013	W	W: P1.5,2: F1-1: ST-11	cc11	8	10	1	22	22	2	-	0.854	-	1	1
29725	M13 240603	2013	W	W: P1.5,2: F4-1: ST-11	cc11	8	10	1	22	22	2	-	0.854	-	1	1
29726	M13 240604	2013	W	W: P1.5,2: F1-1: ST-10651	cc11	8	10	1	22	22	2	-	0.854	-	1	1
29727	M13 240545	2013	W	W: P1.5,2: F1-1: ST-11	cc11	8	10	1	22	22	2	-	0.854	-	1	1
29728	M13 240558	2013	W	W: P1.5,2: F1-1: ST-11	cc11	8	10	1	22	22	2	-	0.854	-	1	1
29729	M13 240594	2013	W	W: P1.5,2: F1-1: ST-11	cc11	8	10	1	22	22	2	-	0.854	-	1	1
29730	M13 240583	2013	W	W: P1.5,2: F1-1: ST-11161	cc11	8	10	1	22	22	2	-	0.854	-	1	1
29731	M13 240510	2013	W	W: P1.5,2: F1-1: ST-11	cc11	8	10	1	22	22	2	-	0.854	-	1	1
29732	M13 240633	2013	W	W: P1.5,2: F1-1: ST-11	cc11	8	10	1	22	22	2	-	0.854	-	1	1
29733	M13 240634	2013	W	W: P1.5,2: F1-1: ST-11	cc11	8	10	1	22	22	2	-	0.854	-	1	1
29734	M13 240538	2013	W	W: P1.5,2: F1-1: ST-11	cc11	8	10	1	22	22	2	-	0.854	-	1	1
29735	M13 240515	2013	W	W: P1.5,2: F1-1: ST-11	cc11	8	10	1	22	22	2	-	0.854	-	1	1
29736	M13 240600	2013	W	W: P1.5,2: F1-1: ST-11	cc11	8	10	1	22	22	2	-	0.854	-	1	1
29737	M13 240553	2013	W	W: P1.5,2: F1-1: ST-11	cc11	8	10	1	22	22	2	-	0.854	-	1	1
29895	M13 240496	2013	C	C: P1.5,2: F3-3: ST-11	cc11	8	1	1	22	22	2	-	0.854	-	1	1
29897	M13 240500	2013	C	C: P1.5-1,10-8: F3-6: ST-11	cc11	8	105	7	669	0	1	-	-	-	5	1
29898	M13 240514	2013	C	C: P1.5,2: F3-3: ST-11	cc11	8	1	1	22	22	2	-	0.854	-	1	1
30136	M13 240635	2013	W	W: P1.5,2: F1-1: ST-11	cc11	8	10	1	22	22	2	-	0.854	-	1	1
30137	M13 240637	2013	W	W: P1.5,2: F1-1: ST-11	cc11	8	10	1	22	22	2	-	0.854	-	1	1
30138	M13 240649	2013	W	W: P1.5,2: F1-1: ST-11	cc11	8	10	1	22	22	2	-	0.854	-	1	1
30139	M13 240655	2013	W	W: P1.5,2: F1-1: ST-11	cc11	8	10	1	22	22	2	-	0.854	-	1	1
30140	M13 240657	2013	W	W: P1.5,2: F1-1: ST-11	cc11	8	10	1	22	22	2	-	0.854	-	1	1
30141	M13 240664	2013	W	W: P1.5,2: F1-1: ST-11	cc11	8	10	1	22	22	2	-	0.854	-	1	1
30143	M13 240667	2013	W	W: P1.5,2: F1-1: ST-11	cc11	8	10	1	22	22	2	-	0.854	-	1	1
30144	M13 240668	2013	W	W: P1.5,2: F1-1: ST-11	cc11	8	10	1	22	22	2	-	0.854	-	1	1
30145	M13 240672	2013	W	W: P1.5,2: F1-1: ST-11	cc11	8	10	1	22	22	2	-	0.854	-	1	1
30146	M13 240678	2013	W	W: P1.5-1,10-4: F1-1: ST-11	cc11	8	10	1	22	22	2	-	0.854	-	1	1
30147	M13 240680	2013	W	W: P1.5,2: F1-1: ST-11	cc11	8	10	1	22	22	2	-	0.854	-	1	1
30148	M13 240681	2013	W	W: P1.5,2: F1-1: ST-11	cc11	8	10	1	22	22	2	-	0.854	-	1	1
30149	M13 240704	2013	W	W: P1.18-1,3: F4-1: ST-1617	cc22	11	9	2	16	16	2	-	0.881	-	1	1
30150	M13 240724	2013	W	W: P1.5,2: F1-1: ST-11	cc11	8	10	1	22	22	2	-	0.854	-	1	1
30151	M13 240726	2013	W	W: P1.5,2: F1-1: ST-11	cc11	8	10	1	22	22	2	-	0.854	-	1	1
30152	M13 240730	2013	W	W: P1.5,2: F1-1: ST-11	cc11	8	10	1	22	22	2	-	0.854	-	1	1
30153	M13 240732	2013	W	W: P1.5,2: F1-1: ST-11	cc11	8	10	1	22	22	2	-	0.854	-	1	1
30154	M14 240001	2014	W	W: P1.5,2: F1-1: ST-11	cc11	8	10	1	22	22	2	-	0.854	-	1	1
30155	M14 240002	2014	W	W: P1.5,2: F1-1: ST-11	cc11	8	10	1	22	22	2	-	0.854	-	1	1
30156	M14 240007	2014	W	W: P1.5,2: F1-1: ST-11	cc11	8	10	1	22	22	2	-	0.854	-	1	1
30157	M14 240013	2014	W	W: P1.5,2: F1-1: ST-11	cc11	8	10	1	22	22	2	-	0.854	-	1	1
30158	M14 240019	2014	W	W: P1.5,2: F1-1: ST-11	cc11	8	10	1	928	762	1	0.915	-	0.915	1	1
30159	M14 240022	2014	W	W: P1.5,2: F1-1: ST-8621	cc11	573	10	1	22	22	2	-	0.854	-	1	1
30160	M14 240026	2014	W	W: P1.5,2: F1-1: ST-11	cc11	8	10	1	22	22	2	-	0.854	-	1	1
30161	M14 240029	2014	W	W: P1.5,2: F1-1: ST-11	cc11	8	10	1	22	22	2	-	0.854	-	1	1
30162	M14 240031	2014	W	W: P1.5,2: F1-1: ST-11	cc11	8	10	1	22	22	2	-	0.854	-	1	1
30163	M14 240042	2014	W	W: P1.5,2: F1-1: ST-11	cc11	8	10	1	22	22	2	-	0.854	-	1	1
30164	M14 240043	2014	W	W: P1.5,2: F1-1: ST-11	cc11	8	10	1	22	22	2	-	0.854	-	18	1
30165	M14 240052	2014	W	W: P1.5,2: F1-1: ST-11	cc11	8	10	1	22	22	2	-	0.854	-	1	1
30166	M14 240053	2014	W	W: P1.5,2: F1-1: ST-10651	cc11	8	10	1	22	22	2	-	0.854	-	1	1
30167	M14 240054	2014	W	W: P1.5,2: F1-1: ST-11	cc11	8	10	1	22	22	2	-	0.854	-	1	1
30168	M14 240072	2014	W	W: P1.5,2: F1-1: ST-11	cc11	8	10	1	22	22	2	-	0.854	-	18	1
30169	M14 240082	2014	W	W: P1.5,2: F1-1: ST-11	cc11	8	10	1	22	22	2	-	0.854	-	1	1
30210	M13 240691	2013	C	C: P1.5-1,10-8: F3-6: ST-11	cc11	8	105	7	13	13	1	0.937	-	0.88	5	1
30211	M13 240735	2013	C	C: P1.5-1,10-4: F4-1: ST-23	cc23	11	35	2	25	25	2	-	0.85	-	1	1
30212	M14 240004	2014	C	C: P1.5-1,10-8: F3-6: ST-ND	Unassigned	8	105	7	13	13	1	0.937	-	0.88	5	1
30213	M14 240094	2014	C	C: P1.5-1,10-8: F3-6: ST-ND	Unassigned	8	105	7	13	13	1	0.937	-	0.88	5	1
30214	M14 240100	2014	C	C: P1.5,2: F3-3: ST-11	cc11	8	1	1	22	22	2	-	0.854	-	1	1
30215	M14 240107	2014	C	C: P1.5,2: F3-3: ST-11	cc11	8	1	1	22	22	2	-	0.854	-	1	1
31162	M14 240329	2014	B	B: P1.5-1,10-8: F5-13: ST-11	cc11	8	223	16	968	785	1	0.964	-	0.888	5	1
34502	M13 240484	2013	Y	Y: P1.5-1,10-4: F4-1: ST-1655	cc23	11	35	2	25	25	2	-	0.85	-	1	1
34503	M13 240485	2013	Y	Y: P1.5-1,10-4: F4-1: ST-1655	cc23	11	35	2	25	25	2	-	0.85	-	1	1
34504	M13 240486	2013	B	B: P1.7-2,13-1: F5-1: ST-269	cc269	8	120	4	15	15	1	0.859	-	0.916	4	2
34505	M13 240488	2013	B	B: P1.7,16-44: F3-3: ST-343	cc32	6	116	8	29	29	3	-	0.935	-	12	8
34506	M13 240490	2013	B	B: P1.22,9: F5-12: ST-5972	cc269	38	11	3	13	13	1	0.937	-	0.88	3	1
34507	M13 240495	2013	B	B: P1.12-1,9: F1-5: ST-41	cc41/44	9	10	1	4	4	1	0.96	-	0.861	2	1
34508	M13 240497	2013	B	B: P1.17-1,23: F1-5: ST-1423	cc41/44	9	120	4	837	683	2	-	0.938	-	4	2
34509	M13 240499	2013	B	B: P1.7-2,4: F3-7: ST-1855	cc269	9	120	4	15	15	1	0.859	-	0.916	4	2
34510	M13 240501	2013	B	B: P1.7-2,4: F1-5: ST-1194	cc41/44	11	10	1	4	4	1	0.96	-	0.861	broken	1
34511	M13 240502	2013	B	B: P1.18-1,16-2: F3-3: ST-32	cc32	6	3	5	1	1	1	1	-	0.861	6	7
34512	M13 240503	2013	W	W: P1.18-1,3: F3-9: ST-184	cc22	11	9	2	16	16	2	-	0.881	-	1	1
34513	M13 240507	2013	B	B: P1.21,16: F4-1: ST-9126	cc174	21	493	54	349	296	2	-	0.877	-	90	2
34514	M13 240508	2013	B	B: P1.5-1,2-2: F5-1: ST-1214	cc269	8	494	4	848	702	1	0.968	-	0.873	31	2
34515	M13 240516	2013	B	B: P1.19,15: F5-1: ST-749	cc32	6	3	5	1	1	1	1	-	0.861	6	3
34516	M13 240519	2013	B	B: P1.5-1,10-1: F5-5: ST-213	cc213	36	495	1	19	19	2	-	0.888	-	1	1
34517	M13 240525	2013	B	B: P1.7-2,4: F1-5: ST-41	cc41/44	9	9	2	4	4	1	0.96	-	0.861	2	1
35227	09.1126.Y	2009	B	B: P1.22,9: F5-12: ST-1161	cc269	38	11	3	13	13	1	0.937	-	0.88	3	1
35228	09.1208.P	2009	B	B: P1.22,14: F5-9: ST-162	cc162	26	30	1	365	309	1	0.921	-	0.911	1	1
35229	09.1211.Y	2009	B	B: P1.22,9: F5-12: ST-275	cc269	38	11	3	13	13	1	0.937	-	0.88	3	1
35230	09.1292.T	2009	B	B: P1.22,14: F5-9: ST-162	cc162	26	30	1	365	309	1	0.921	-	0.911	1	1
35231	09.1331.Y	2009	B	B: P1.7-2,4: F1-5: ST-5981	cc41/44	9	113	6	4	4	1	0.96	-	0.861	2	1
35232	09.1368.F	2009	B	B: P1.22,14-6: F1-5: ST-207	cc41/44	9	520	1	19	19	2	-	0.888	-	1	1
35233	09.1385.H	2009	Y	Y: P1.5-1,10-1: F4-1: ST-ND	Unassigned	11	35	2	25	25	2	-	0.85	-	1	1
35234	09.1402.B	2009	B	B: P1.22,14: F5-5: ST-11221	cc213	36	125	1	65	45	3	-	1	-	8	1
35235	09.1453.F	2009	B	B: P1.7-2,4: F1-5: ST-41	cc41/44	9	10	1	4	4	1	0.96	-	0.861	2	1
35236	09.1507.Q	2009	B	B: P1.7-2,4: F1-5: ST-2989	cc41/44	11	10	1	4	4	1	0.96	-	0.861	2	1
35237	09.1514.A	2009	B	B: P1.22,9: F5-12: ST-275	cc269	38	11	3	13	13	1	0.937	-	0.88	3	1
35238	09.1557.B	2009	B	B: P1.22,14: F5-5: ST-213	cc213	36	125	1	65	45	3	-	1	-	91	1
35239	09.1580.V	2009	B	B: P1.7,16: F3-3: ST-32	cc32	6	3	5	1	1	1	1	-	0.861	6	7
35240	09.1595.J	2009	B	B: P1.22-1,14: F-ND: ST-35	cc35	6	233	1	16	16	2	-	0.881	-	1	4
35241	09.1619.R	2009	B	B: P1.7-2,4: F1-5: ST-41	cc41/44	9	10	1	4	4	1	0.96	-	0.861	2	1
35242	09.1857.M	2009	B	B: P1.5-2,10-1: F5-36: ST-1157	cc1157	21	11	3	68	13	1	0.937	-	0.88	3	1
35243	09.1858.V	2009	B	B: P1.19-1,15-11: F5-1: ST-269	cc269	8	120	4	15	15	1	0.859	-	0.916	10	2
35244	09.1893.P	2009	B	B: P1.19-1,15-11: F5-1: ST-269	cc269	8	120	4	15	15	1	0.859	-	0.916	10	2
35245	09.1976.T	2009	B	B: P1.22,9: F5-12: ST-2307	Unassigned	38	30	1	19	19	2	-	0.888	-	1	1
35246	09.1999.X	2009	B	B: P1.22,14: F5-9: ST-162	cc162	26	30	1	365	309	1	0.921	-	0.911	1	1
35247	09.2014.G	2009	B	B: P1.17-1,23-2: F5-2: ST-1097	cc41/44	9	10	1	19	19	2	-	0.888	-	1	1
35248	09.2045.J	2009	B	B: P1.5-1,10-4: F5-56: ST-41	cc41/44	9	10	1	4	4	1	0.96	-	0.861	2	1
35249	09.2061.P	2009	Y	Y: P1.5-1,10-10: F4-1: ST-1655	cc23	11	35	2	25	25	2	-	0.85	-	1	1
35250	09.2082.C	2009	B	B: P1.7-2,4: F1-7: ST-7415	cc41/44	36	10	1	19	19	2	-	0.888	-	1	1
35251	09.2204.A	2009	B	B: P1.21,16: F1-7: ST-11222	cc60	3	10	1	19	19	2	-	0.888	-	1	1
35252	09.2270.V	2009	B	B: P1.7-2,4: F1-19: ST-2266	cc41/44	9	402	10	4	4	1	0.96	-	0.861	1	1
35253	09.2386.V	2009	B	B: P1.7-2,4: F1-5: ST-340	cc41/44	3	195	9	281	14	1	0.917	-	0.907	5	1
35254	09.2439.W	2009	B	B: P1.22,14: F5-5: ST-213	cc213	36	1	1	22	22	2	-	0.854	-	1	1
35255	09.2522.Q	2009	B	B: P1.7-2,4: F1-5: ST-42	cc41/44	9	13	1	14	14	1	0.917	-	0.907	7	1
35256	09.2622.N	2009	B	B: P1.19,13-1: F5-1: ST-479	cc269	8	120	4	15	15	1	0.859	-	0.916	4	2
35257	09.2658.E	2009	B	B: P1.7-2,4: F1-2: ST-41	cc41/44	9	10	1	4	4	1	0.96	-	0.861	2	1
35258	09.2799.W	2009	W	W: P1.18-1,3: F4-1: ST-1224	cc22	78	9	2	16	16	2	-	0.881	-	1	1
35259	09.2935.B	2009	B	B: P1.18-1,1: F3-9: ST-103	cc103	5	35	2	25	25	2	-	0.85	-	1	1
35260	09.2939.N	2009	B	B: P1.22,14: F5-5: ST-213	cc213	36	10	1	4	4	1	0.96	-	0.861	2	1
35261	09.2961.S	2009	B	B: P1.7-2,4: F1-5: ST-154	cc41/44	11	10	1	4	4	1	0.96	-	0.861	2	1
35262	09.3026.N	2009	B	B: P1.22,9: F5-12: ST-4388	Unassigned	38	11	3	13	13	1	0.937	-	0.88	3	1
35263	09.3029.P	2009	B	B: P1.22,9: F5-12: ST-4388	Unassigned	38	11	3	13	13	1	0.937	-	0.88	3	1
35264	09.3063.L	2009	B	B: P1.22,14: F5-9: ST-162	cc162	26	30	1	21	21	2	-	0.854	-	1	1
35265	09.3091.W	2009	B	B: P1.22,9: F1-5: ST-1163	cc269	3	30	1	394	19	2	-	0.888	-	1	1
35266	09.3167.H	2009	Y	Y: P1.21,16: F3-7: ST-7867	cc174	5	30	1	21	21	2	-	0.854	-	1	1
35267	09.3271.E	2009	B	B: P1.7-2,4: F1-5: ST-154	cc41/44	11	10	1	4	4	1	0.96	-	0.861	2	1
35268	09.3302.K	2009	Y	Y: P1.21,16: F3-7: ST-1466	cc174	5	30	1	21	21	2	-	0.854	-	1	1
35269	09.3351.N	2009	B	B: P1.19,13-1: F5-1: ST-479	cc269	8	120	4	15	15	1	0.859	-	0.916	4	2
35270	09.3368.H	2009	B	B: P1.7-2,4: F1-5: ST-41	cc41/44	9	8	1	13	13	1	0.937	-	0.88	3	1
35271	10.1171.X	2010	Y	Y: P1.5-2,10-1: F4-1: ST-23	cc23	11	206	13	345	293	3	-	0.938	-	23	1
35272	10.1177.P	2010	B	B: P1.7,16: F3-3: ST-259	cc32	6	3	5	1	1	1	1	-	0.861	6	3
35273	10.1199.K	2010	B	B: P1.22,9: F5-1: ST-1195	cc269	8	120	4	15	15	1	0.859	-	0.916	4	2
35274	10.1352.R	2010	B	B: P1.22,14: F5-5: ST-213	cc213	36	125	1	65	45	3	-	1	-	8	1
35275	10.1430.T	2010	B	B: P1.7,16: F3-3: ST-800	cc32	6	3	5	1	1	1	1	-	0.861	6	7
35276	10.1516.S	2010	B	B: P1.22,9: F5-1: ST-1195	cc269	8	120	4	15	15	1	0.859	-	0.916	4	2
35277	10.1718.Z	2010	B	B: P1.21,16: F1-7: ST-2002	cc60	3	8	1	13	13	1	0.937	-	0.88	3	1
35278	10.1746.F	2010	B	B: P1.22,9: F5-12: ST-275	cc269	38	30	1	19	19	2	-	0.888	-	1	1
35279	10.1962.Z	2010	B	B: P1.22,9: F5-12: ST-4388	Unassigned	38	11	3	13	13	1	0.937	-	0.88	3	1
35280	10.2012.H	2010	B	B: P1.7-2,4: F1-25: ST-8054	cc41/44	26	113	6	4	4	1	0.96	-	0.861	2	1
35281	10.2126.Z	2010	B	B: P1.19-5,15: F5-1: ST-479	cc269	8	316	26	155	2	1	0.968	-	0.873	5	1
35282	10.2240.T	2010	B	B: P1.22,9: F5-12: ST-8440	cc269	60	11	3	13	13	1	0.937	-	0.88	3	1
35283	10.2273.P	2010	W	W: P1.18-1,3: F4-1: ST-184	cc22	11	9	2	16	16	2	-	0.881	-	1	1
35284	10.2289.A	2010	B	B: P1.22,9: F5-12: ST-1161	cc269	38	11	3	13	13	1	0.937	-	0.88	3	1
35285	10.2352.E	2010	B	B: P1.22,9: F5-12: ST-1161	cc269	38	11	3	13	13	1	0.937	-	0.88	3	1
35286	10.2397.V	2010	B	B: P1.19,15: F4-21: ST-1764	cc35	6	521	2	278	220	1	0.9	-	0.923	92	1
35287	10.2422.K	2010	B	B: P1.7-2,4: F1-5: ST-340	cc41/44	3	195	9	281	14	1	0.917	-	0.907	5	1
35288	10.2509.N	2010	B	B: P1.22,14: F5-1: ST-8487	cc269	8	310	2	15	15	1	0.859	-	0.916	4	1
35289	10.2631.L	2010	Z	Z: P1.18-1,1: F5-8: ST-103	cc103	5	35	2	25	25	2	-	0.85	-	1	1
35290	10.2763.M	2010	B	B: P1.7-2,4: F1-5: ST-8539	cc41/44	247	10	1	4	4	1	0.96	-	0.861	2	1
35291	10.2850.R	2010	B	B: P1.7-2,4: F1-5: ST-154	cc41/44	11	10	1	4	4	1	0.96	-	0.861	2	1
35292	10.2854.Q	2010	B	B: P1.22,14: F5-5: ST-11223	cc213	36	415	15	421	354	3	-	0.931	-	93	9
35293	10.2884.V	2010	B	B: P1.22,9: F5-12: ST-8616	cc269	563	30	1	19	19	2	-	0.888	-	1	1
35294	10.3051.M	2010	B	B: P1.7,30: F1-15: ST-944	cc41/44	9	10	1	1014	19	2	-	0.888	-	1	2
35295	10.3134.R	2010	Y	Y: P1.5-1,10-22: F5-1: ST-114	cc22	11	9	2	16	16	2	-	0.881	-	1	1
35296	11.1071.G	2011	B	B: P1.7-2,4: F1-5: ST-340	cc41/44	3	195	9	281	14	1	0.917	-	0.907	5	1
35297	11.1190.L	2010	B	B: P1.18-1,14: F1-5: ST-8731	cc41/44	11	10	1	4	4	1	0.96	-	0.861	2	1
35298	11.1286.D	2011	B	B: P1.18-1,14: F1-5: ST-8722	cc41/44	11	10	1	4	4	1	0.96	-	0.861	2	1
35299	11.1312.X	2011	B	B: P1.7-2,4: F1-5: ST-42	cc41/44	9	13	1	14	14	1	0.917	-	0.907	7	1
35300	11.1376.W	2011	B	B: P1.7,16: F3-3: ST-800	cc32	6	3	5	1	1	1	1	-	0.861	6	7
35301	11.1392.G	2011	B	B: P1.19-1,15-11: F5-1: ST-269	cc269	8	120	4	15	15	1	0.859	-	0.916	4	2
35302	11.1426.J	2011	B	B: P1.7-2,4: F1-5: ST-154	cc41/44	11	10	1	4	4	1	0.96	-	0.861	2	1
35303	11.1479.T	2011	B	B: P1.7-2,4: F3-28: ST-41	cc41/44	9	10	1	4	4	1	0.96	-	0.861	2	6
35304	11.1489.Z	2011	B	B: P1.21,16: F5-5: ST-2923	cc60	3	8	1	13	13	1	0.937	-	0.88	3	1
35305	11.1575.Q	2011	B	B: P1.18-1,34: F3-6: ST-3318	Unassigned	3	11	3	13	13	1	0.937	-	0.88	3	1
35306	11.1688.D	2011	B	B: P1.22,14: F5-5: ST-2660	cc213	36	125	1	65	45	3	-	1	-	8	1
35307	11.1709.B	2011	B	B: P1.22,14: F5-5: ST-213	cc213	36	125	1	65	45	3	-	1	-	94	1
35308	11.1825.A	2011	B	B: P1.22,14-6: F1-5: ST-6566	cc41/44	9	10	1	19	19	2	-	0.888	-	1	1
35309	11.1826.C	2011	B	B: P1.22,14-6: F1-5: ST-6566	cc41/44	9	10	1	19	19	2	-	0.888	-	1	1
35310	11.2087.F	2011	B	B: P1.22,14: F1-7: ST-213	cc213	36	125	1	65	45	3	-	1	-	8	1
35311	11.2169.T	2011	B	B: P1.22,9: F5-12: ST-1163	cc269	3	30	1	19	19	2	-	0.888	-	1	1
35312	11.2463.D	2011	B	B: P1.7-2,4: F5-8: ST-2806	cc41/44	9	10	1	4	4	1	0.96	-	0.861	2	1
35313	11.2525.L	2011	B	B: P1.22,9: F5-12: ST-1161	cc269	38	11	3	13	13	1	0.937	-	0.88	3	1
35314	11.2909.Z	2011	Y	Y: P1.5-1,10-1: F4-1: ST-1655	cc23	11	35	2	25	25	2	-	0.85	-	1	1
35315	11.3133.X	2011	B	B: P1.22,14: F5-9: ST-162	cc162	26	30	1	365	309	1	0.921	-	0.911	1	1
35316	11.3808.A	2011	B	B: P1.19-1,15-11: F5-1: ST-8926	cc269	14	10	1	234	210	1	0.875	-	0.897	1	1
35317	11.3888.K	2011	Y	Y: P1.5-1,10-1: F4-1: ST-1655	cc23	11	35	2	25	25	2	-	0.85	-	1	1
35318	11.4891.D	2011	B	B: P1.18-1,9: F5-12: ST-8227	cc269	38	11	3	13	13	1	0.937	-	0.88	3	1
35319	11.4999.T	2011	B	B: P1.7-2,4: F1-5: ST-7385	cc41/44	111	13	1	14	14	1	0.917	-	0.907	30	1
35320	11.5380.D	2011	B	B: P1.17,9: F5-5: ST-9000	Unassigned	15	2	1	246	232	1	0.956	-	0.861	2	1
35321	11.5384.H	2011	B	B: P1.22,9: F5-12: ST-275	cc269	38	30	1	19	19	2	-	0.888	-	1	1
35322	11.5445.E	2011	B	B: P1.22,14: F5-36: ST-1157	cc1157	21	11	3	68	13	1	0.937	-	0.88	3	1
35323	11.5563.G	2011	W	W: P1.18-1,3: F4-1: ST-184	cc22	11	9	2	16	16	2	-	0.881	-	1	1
35324	11.5842.B	2011	B	B: P1.7-2,4: F5-36: ST-3866	cc41/44	3	13	1	14	14	1	0.917	-	0.907	1	1
35325	11.5915.A	2011	B	B: P1.22,14: F5-5: ST-ND	Unassigned	36	125	1	65	45	3	-	1	-	8	1
35326	11.6644.A	2011	B	B: P1.22,9: F5-12: ST-9198	cc269	616	11	3	13	13	1	0.937	-	0.88	3	1
35327	11.6835.D	2011	B	B: P1.21-2,28: F3-7: ST-2380	cc35	6	105	7	92	95	2	-	0.854	-	5	1
35328	11.7141.B	2011	B	B: P1.19-1,15-11: F5-1: ST-269	cc269	8	29	1	148	141	3	-	0.969	-	1	4
35329	12.1092.Y	2012	B	B: P1.19-1,13-1: F3-9: ST-103	cc103	5	35	2	25	25	2	-	0.85	-	1	1
35330	12.1192.H	2012	B	B: P1.18-1,3: F3-9: ST-1946	cc461	192	127	2	71	47	3	-	0.961	-	1	1
35331	12.1222.T	2012	B	B: P1.5,2: F1-7: ST-60	cc60	3	35	2	1015	589	1	0.929	-	0.873	1	1
35332	12.1512.D	2012	Y	Y: P1.5-1,10-1: F4-1: ST-1655	cc23	11	35	2	25	25	2	-	0.85	-	1	1
35333	12.1555.H	2012	W	W: P1.18-1,3: F5-12: ST-4475	cc22	11	9	2	16	16	2	-	0.881	-	1	25
35334	12.8515.D	2012	B	B: P1.22,9: F4-1: ST-5372	cc269	38	30	1	1016	260	1	0.933	-	0.876	1	1
35335	12.8534.X	2012	B	B: P1.7-2,4: F1-5: ST-9996	cc41/44	5	10	1	4	4	1	0.96	-	0.861	2	1
35336	12.8840.D	2012	Y	Y: P1.5-1,10-1: F4-1: ST-1655	cc23	11	35	2	25	25	2	-	0.85	-	1	1
35337	13.1012.H	2012	B	B: P1.22,9: F5-12: ST-1161	cc269	38	11	3	13	13	1	0.937	-	0.88	3	1
35338	13.1296.J	2013	Y	Y: P1.5-1,10-4: F4-1: ST-1655	cc23	11	9	2	24	24	2	-	0.854	-	1	2
35339	13.1297.B	2013	B	B: P1.22,9: F4-1: ST-5372	cc269	38	30	1	1016	260	1	0.933	-	0.876	1	1
35340	13.1370.Z	2013	B	B: P1.22,14: F5-5: ST-213	cc213	36	522	15	463	393	1	0.903	-	0.9	34	1
35341	13.1395.T	2013	B	B: P1.22,9: F5-12: ST-1161	cc269	38	11	3	13	13	1	0.937	-	0.88	3	1
35342	13.1396.M	2013	B	B: P1.19-1,15-11: F5-1: ST-269	cc269	8	120	4	15	15	1	0.859	-	0.916	4	2
35343	13.1682.M	2013	B	B: P1.22,9: F5-12: ST-1161	cc269	38	11	3	13	13	1	0.937	-	0.88	3	1
35344	13.2342.Z	2013	B	B: P1.22,9: F5-12: ST-1161	cc269	38	11	3	13	13	1	0.937	-	0.88	3	1
35345	13.2973.F	2013	B	B: P1.7-1,13-1: F3-9: ST-461	cc461	60	127	2	71	47	3	-	0.961	-	1	1
35346	13.3065.D	2013	B	B: P1.19-2,13-1: F3-9: ST-461	cc461	60	127	2	71	47	3	-	0.961	-	1	1
35347	13.3207.X	2013	B	B: P1.22,14: F1-2: ST-10201	cc213	36	1	1	65	45	3	-	1	-	42	1
35348	13.3348.S	2013	Y	Y: P1.5-1,10-4: F-ND: ST-23	cc23	11	35	2	25	25	2	-	0.85	-	1	1
35349	13.3789.S	2013	Y	Y: P1.5-1,10-1: F4-1: ST-1655	cc23	11	35	2	25	25	2	-	0.85	-	1	1
35350	13.3813.B	2013	B	B: P1.22,9: F5-12: ST-275	cc269	38	30	1	19	19	2	-	0.888	-	1	1
35351	13.3867.V	2013	B	B: P1.22,9: F5-12: ST-1161	cc269	38	11	3	13	13	1	0.937	-	0.88	3	1
35352	13.4061.L	2013	B	B: P1.22,9: F4-1: ST-5372	cc269	38	30	1	1016	260	1	0.933	-	0.876	1	1
35353	13.4142.L	2013	B	B: P1.19-1,15-11: F5-1: ST-8487	cc269	8	120	4	15	15	1	0.859	-	0.916	10	2
35354	13.4278.S	2013	B	B: P1.7-2,4: F1-5: ST-41	cc41/44	9	10	1	4	4	1	0.96	-	0.861	2	1
35355	13.4514.P	2013	B	B: P1.7-49,13-1: F5-1: ST-1098	cc32	5	3	5	1	1	1	1	-	0.861	6	3
35356	12.1860.E	2012	B	B: P1.22,9: F1-5: ST-1163	cc269	3	30	1	394	19	2	-	0.888	-	1	1
35357	12.1954.S	2012	B	B: P1.22-1,4: F5-12: ST-275	cc269	38	5	1	19	19	2	-	0.888	-	8	10
35358	12.2326.H	2012	B	B: P1.19,15: F1-15: ST-284	Unassigned	9	108	14	292	238	1	0.976	-	0.876	21	5
35359	12.2412.W	2012	Y	Y: P1.5-1,2-2: F5-8: ST-23	cc23	11	35	2	25	25	2	-	0.85	-	1	1
35360	12.2589.T	2012	B	B: P1.7-2,4: F5-9: ST-9293	cc162	26	30	1	21	21	2	-	0.854	-	1	1
35361	12.2953.Y	2012	B	B: P1.22,9: F1-7: ST-9383	Unassigned	3	10	1	262	260	1	0.933	-	0.876	1	2
35362	12.3021.W	2012	B	B: P1.7-1,1: F1-5: ST-46	cc41/44	3	10	1	4	4	1	0.96	-	0.861	2	1
35363	12.3084.V	2012	B	B: P1.7,9: F3-20: ST-9408	Unassigned	8	202	15	30	30	3	-	0.931	-	17	11
35364	12.4811.X	2012	B	B: P1.22,9: F1-7: ST-1163	cc269	3	30	1	19	19	2	-	0.888	-	1	1
35365	12.4819.T	2012	B	B: P1.19-1,16: F5-1: ST-269	cc269	8	120	4	15	15	1	0.859	-	0.916	4	2
35366	12.4885.X	2012	C	C: P1.21,16-36: F5-8: ST-6610	Unassigned	26	523	2	1017	819	1	0.941	-	0.857	53	1
35367	12.4886.L	2012	C	C: P1.21,16-36: F5-8: ST-6610	Unassigned	26	523	2	1017	819	1	0.941	-	0.857	53	1
35368	12.6364.V	2012	B	B: P1.7,30-1: F1-15: ST-5952	Unassigned	6	367	6	19	19	2	-	0.888	-	1	2
35369	12.6501.H	2012	B	B: P1.22,14: F5-5: ST-9753	cc213	36	524	2	227	170	3	-	0.931	-	9	1
35370	12.7012.F	2012	Y	Y: P1.5-1,10-1: F4-1: ST-1655	cc23	11	35	2	25	25	2	-	0.85	-	1	1
35371	12.7350.H	2012	W	W: P1.5,2: F1-1: ST-11	cc11	8	10	1	22	22	2	-	0.854	-	1	1
35372	12.7377.D	2012	B	B: P1.22,9: F5-12: ST-4388	Unassigned	38	11	3	13	13	1	0.937	-	0.88	3	1
35373	12.7548.W	2012	B	B: P1.22,9: F5-12: ST-275	cc269	38	11	3	13	13	1	0.937	-	0.88	3	1
35374	12.8180.Y	2012	B	B: P1.22,9: F5-1: ST-275	cc269	38	525	55	1018	109	2	-	0.892	-	95	1
35375	12.8381.Y	2012	B	B: P1.22,9: F4-1: ST-5372	cc269	38	30	1	1016	260	1	0.933	-	0.876	1	1
35376	12.8408.J	2012	Y	Y: P1.5-1,10-1: F4-1: ST-1655	cc23	11	35	2	25	25	2	-	0.85	-	1	1
35377	12.8444.A	2012	C	C: P1.5,2: F5-8: ST-8	cc8	8	29	1	16	16	2	-	0.881	-	1	4
35378	09.1936.F	2009	B	B: P1.22,14: F5-56: ST-41	cc41/44	9	10	1	4	4	1	0.96	-	0.861	2	1
35379	09.2807.A	2009	B	B: P1.22,14: F5-7: ST-213	cc213	36	275	2	29	29	3	-	0.935	-	12	1
35380	12.3882.E	2012	Y	Y: P1.5-1,10-22: F5-1: ST-114	cc22	11	46	20	91	94	3	-	0.957	-	57	9
35381	13.4765.S	2013	B	B: P1.7,30-1: F1-5: ST-41	cc41/44	9	10	1	4	4	1	0.96	-	0.861	2	1
35382	13.4767.Q	2013	Y	Y: P1.5-1,10-1: F4-1: ST-1655	cc23	11	35	2	25	25	2	-	0.85	-	1	1
35383	13.5135.Z	2013	B	B: P1.22-1,14: F4-1: ST-35	cc35	6	233	1	16	16	2	-	0.881	-	1	4
35384	13.5154.G	2013	Y	Y: P1.5-1,10-1: F4-1: ST-1655	cc23	11	35	2	25	25	2	-	0.85	-	1	1
35385	13.5226.K	2013	B	B: P1.22,9: F5-5: ST-ND	Unassigned	3	30	1	19	19	2	-	0.888	-	1	1
35386	13.5556.G	2013	B	B: P1.22,14: F5-5: ST-11224	cc213	36	125	1	65	45	3	-	1	-	54	1
35387	13.5557.N	2013	B	B: P1.22,14: F5-5: ST-11224	cc213	36	125	1	65	45	3	-	1	-	54	1
35388	13.6067.H	2013	B	B: P1.7-2,4: F1-5: ST-10806	cc41/44	3	13	1	14	14	1	0.917	-	0.907	1	1
35389	13.6117.K	2013	B	B: P1.21-7,16: F5-36: ST-1157	cc1157	21	11	3	68	13	1	0.937	-	0.88	96	1
35390	13.6161.J	2013	B	B: P1.7-2,4: F1-5: ST-42	cc41/44	9	13	1	14	14	1	0.917	-	0.907	7	1
35391	13.6352.Q	2013	Y	Y: P1.5-1,10-1: F4-1: ST-1655	cc23	11	35	2	25	25	2	-	0.85	-	1	1
35392	13.6756.W	2013	B	B: P1.19,15-7: F1-7: ST-8931	cc41/44	9	10	1	19	19	2	-	0.888	-	1	1
35393	13.7214.J	2013	W	W: P1.18-1,3: F4-1: ST-1224	cc22	78	9	2	16	16	2	-	0.881	-	55	1
35394	13.7552.F	2013	B	B: P1.7-2,4: F1-5: ST-41	cc41/44	9	10	1	4	4	1	0.96	-	0.861	2	1
35395	13.7896.B	2013	B	B: P1.22-13,14: F3-6: ST-18	cc18	10	18	1	36	37	1	0.937	-	0.847	1	1
35396	13.8092.Q	2013	B	B: P1.21-7,16: F5-36: ST-3135	cc1157	21	11	3	68	13	1	0.937	-	0.88	3	1
35397	13.8552.X	2013	W	W: P1.5,2: F1-1: ST-11	cc11	8	10	1	22	22	2	-	0.854	-	1	1
35422	M13 240526	2013	B	B: P1.18-1,30-2: F3-6: ST-ND	Unassigned	216	266	1	16	16	2	-	0.881	-	1	4
35423	M13 240528	2013	W	W: P1.18-1,3: F3-9: ST-184	cc22	11	9	2	16	16	2	-	0.881	-	1	1
35424	M13 240529	2013	Y	Y: P1.5-1,10-4: F4-1: ST-1655	cc23	11	35	2	25	25	2	-	0.85	-	1	1
35425	M13 240531	2013	W	W: P1.5,2: F1-1: ST-11	cc11	8	10	1	22	22	2	-	0.854	-	1	1
35426	M13 240532	2013	B	B: P1.5-1,10-1: F1-5: ST-11225	cc41/44	9	10	1	4	4	1	0.96	-	0.861	2	1
35427	M13 240534	2013	B	B: P1.19-2,13-1: F3-9: ST-1946	cc461	192	527	1	1036	830	1	0.857	-	0.965	97	1
35428	M13 240535	2013	B	B: P1.19,15: F4-28: ST-34	cc32	5	3	5	1	1	1	1	-	0.861	6	3
35429	M13 240536	2013	B	B: P1.22,9: F5-5: ST-1163	cc269	3	30	1	19	19	2	-	0.888	-	1	1
35430	M13 240540	2013	B	B: P1.22,9: F5-12: ST-275	cc269	38	30	1	19	19	2	-	0.888	-	1	1
35431	M13 240542	2013	B	B: P1.5,2: F5-5: ST-11226	cc213	36	125	1	65	45	3	-	1	-	8	1
35432	M13 240543	2013	Y	Y: P1.5-1,10-1: F4-1: ST-1655	cc23	11	35	2	25	25	2	-	0.85	-	1	1
35433	M13 240546	2013	B	B: P1.22,14: F1-33: ST-213	cc213	36	#N/A	25	606	31	3	-	0.965	-	9	1
35434	M13 240548	2013	B	B: P1.17-1,23-2: F1-7: ST-303	cc41/44	9	10	1	19	19	2	-	0.888	-	1	1
35435	M13 240549	2013	Y	Y: P1.5-1,10-1: F4-1: ST-1655	cc23	11	35	2	25	25	2	-	0.85	-	1	1
35436	M13 240554	2013	B	B: P1.19-2,13-1: F5-5: ST-461	cc461	60	9	2	71	47	3	-	0.961	-	1	1
35437	M13 240560	2013	B	B: P1.12-6,13-4: F1-7: ST-7516	cc41/44	8	528	56	611	525	1	0.972	-	0.861	98	1
35438	M13 240561	2013	B	B: P1.7-2,4: F1-5: ST-11227	cc41/44	9	10	1	4	4	1	0.96	-	0.861	2	1
35439	M13 240562	2013	B	B: P1.19,16: F1-5: ST-1163	cc269	3	30	1	19	19	2	-	0.888	-	1	1
35440	M13 240564	2013	B	B: P1.7-2,4: F1-5: ST-11229	cc41/44	721	10	1	4	4	1	0.96	-	0.861	2	1
35441	M13 240565	2013	B	B: P1.19-1,15-11: F5-1: ST-283	cc269	8	120	4	15	15	1	0.859	-	0.916	4	2
35442	M13 240566	2013	B	B: P1.22,14-32: F3-9: ST-213	cc213	36	125	1	65	45	3	-	1	-	8	1
35443	M13 240568	2013	B	B: P1.19-1,15-11: F5-1: ST-269	cc269	8	120	4	15	15	1	0.859	-	0.916	4	2
35444	M13 240572	2013	B	B: P1.5,2: F5-1: ST-11237	cc269	8	529	8	1021	831	1	0.921	-	0.903	99	1
35445	M13 240573	2013	Y	Y: P1.5-1,10-1: F4-1: ST-9842	cc23	11	35	2	25	25	2	-	0.85	-	1	1
35446	M13 240574	2013	Y	Y: P1.5-1,10-1: F4-1: ST-1655	cc23	11	35	2	25	25	2	-	0.85	-	1	1
35447	M13 240579	2013	B	B: P1.7-2,4: F5-1: ST-11238	cc269	21	120	4	15	15	1	0.859	-	0.916	4	2
35448	M13 240581	2013	B	B: P1.19-2,13-9: F3-9: ST-1946	cc461	192	127	2	71	47	3	-	0.961	-	1	1
35449	M13 240588	2013	Y	Y: P1.5-1,10-4: F3-4: ST-1624	cc167	9	48	10	24	24	2	-	0.854	-	1	1
35450	M13 240590	2013	Y	Y: P1.5-1,10-4: F4-1: ST-ND	Unassigned	11	35	2	25	25	2	-	0.85	-	1	1
35451	M13 240592	2013	B	B: P1.22,9: F5-12: ST-11239	cc269	38	11	3	13	13	1	0.937	-	0.88	3	1
35452	M13 240593	2013	B	B: P1.22,14: F5-9: ST-162	cc162	26	530	2	21	21	2	-	0.854	-	4	1
35453	M13 240595	2013	W	W: P1.22,14: F4-1: ST-184	cc22	11	9	2	16	16	2	-	0.881	-	1	1
35454	M13 240596	2013	B	B: P1.19-1,15-11: F5-1: ST-269	cc269	8	120	4	15	15	1	0.859	-	0.916	4	2
35455	M13 240598	2013	Y	Y: P1.17-1,23-2: F1-7: ST-303	cc41/44	9	10	1	19	19	2	-	0.888	-	1	1
35456	M13 240599	2013	Y	Y: P1.5-2,10-1: F4-1: ST-23	cc23	11	206	13	345	293	3	-	0.938	-	23	1
35457	M13 240601	2013	B	B: P1.7-2,4: F1-5: ST-41	cc41/44	9	9	2	4	4	1	0.96	-	0.861	37	1
35458	M13 240605	2013	B	B: P1.22,9: F5-12: ST-11328	Unassigned	38	11	3	13	13	1	0.937	-	0.88	3	1
35459	M13 240608	2013	B	B: P1.19,15-1: F1-5: ST-2821	cc41/44	9	2	1	4	4	1	0.96	-	0.861	2	1
35460	M13 240610	2013	Y	Y: P1.5-1,10-1: F4-1: ST-1655	cc23	11	35	2	25	25	2	-	0.85	-	1	1
35461	M13 240611	2013	B	B: P1.22,9: F5-5: ST-1163	cc269	3	30	1	19	19	2	-	0.888	-	1	1
35462	M13 240613	2013	B	B: P1.7-2,4: F1-5: ST-2314	cc41/44	9	10	1	4	4	1	0.96	-	0.861	2	1
35463	M13 240614	2013	B	B: P1.7-2,4: F3-9: ST-10868	cc41/44	9	402	10	4	4	1	0.96	-	0.861	1	1
35464	M13 240615	2013	B	B: P1.7-2,4: F1-7: ST-ND	Unassigned	106	35	2	789	25	2	-	0.85	-	1	1
35465	M13 240618	2013	B	B: P1.19-1,15-11: F5-1: ST-ND	Unassigned		120	4	15	15	1	0.859	-	0.916	4	2
35466	M13 240619	2013	B	B: P1.7-2,14: F5-5: ST-213	cc213	36	614	27	97	89	1	0.968	-	0.865	5	5
35467	M13 240620	2013	B	B: P1.18-1,3: F1-5: ST-1194	cc41/44	11	10	1	4	4	1	0.96	-	0.861	broken	1
35468	M13 240622	2013	Y	Y: P1.5-1,10-1: F4-1: ST-1655	cc23	11	35	2	25	25	2	-	0.85	-	1	1
35469	M13 240623	2013	B	B: P1.22-1,14: F4-1: ST-35	cc35	6	2	1	4	4	1	0.96	-	0.861	2	1
35470	M13 240624	2013	B	B: P1.7-2,4: F5-5: ST-8380	cc41/44	9	10	1	4	4	1	0.96	-	0.861	2	1
35471	M13 240626	2013	B	B: P1.22,14: F1-5: ST-41	cc41/44	9	10	1	4	4	1	0.96	-	0.861	2	1
35472	M13 240627	2013	Y	Y: P1.5-1,10-4: F3-4: ST-1624	cc167	9	48	10	24	24	2	-	0.854	-	1	1
35473	M13 240632	2013	B	B: P1.22,14: F5-12: ST-11243	Unassigned	9	105	7	205	187	3	-	0.98	-	5	1
35474	M13 240636	2013	B	B: P1.5-2,10-1: F3-3: ST-41	cc41/44	9	10	1	4	4	1	0.96	-	0.861	2	6
35475	M13 240638	2013	B	B: P1.22,4: F5-12: ST-11329	Unassigned	38	30	1	19	19	2	-	0.888	-	1	1
35476	M13 240639	2013	B	B: P1.22,14: F5-5: ST-ND	Unassigned	36	#N/A	1	65	45	3	-	1	-	8	1
35477	M13 240640	2013	B	B: P1.22,9: F5-12: ST-9180	cc269	608	11	3	13	13	1	0.937	-	0.88	3	1
35478	M13 240641	2013	B	B: P1.7-2,4: F3-9: ST-41	cc41/44	9	10	1	4	4	1	0.96	-	0.861	broken	6
35479	M13 240642	2013	B	B: P1.22,14: F5-5: ST-3120	cc213	36	#N/A	57	65	45	3	-	1	-	8	1
35480	M13 240644	2013	B	B: P1.22,14: F1-7: ST-461	cc461	60	127	2	71	47	3	-	0.961	-	1	1
35481	M13 240646	2013	B	B: P1.5,2: F1-7: ST-ND	Unassigned	3	30	1	19	19	2	-	0.888	-	1	1
35482	M13 240647	2013	B	B: P1.7-2,4: F1-5: ST-41	cc41/44	9	113	6	4	4	1	0.96	-	0.861	2	1
35483	M13 240648	2013	B	B: P1.12-1,16: F1-5: ST-485	cc41/44	8	10	1	4	4	1	0.96	-	0.861	2	1
35484	M13 240652	2013	Y	Y: P1.5-1,10-1: F4-1: ST-1655	cc23	11	35	2	25	25	2	-	0.85	-	1	1
35485	M13 240658	2013	B	B: P1.22,9: F5-12: ST-1161	cc269	38	11	3	13	13	1	0.937	-	0.88	3	1
35486	M13 240662	2013	B	B: P1.7-2,4: F5-2: ST-9174	Unassigned	12	37	1	14	14	1	0.917	-	0.907	55	1
35487	M13 240663	2013	Y	Y: P1.5-1,10-1: F-ND: ST-1655	cc23	11	35	2	25	25	2	-	0.85	-	1	1
35488	M13 240665	2013	B	B: P1.22,14: F5-5: ST-213	cc213	36	532	2	1024	499	3	-	0.973	-	24	1
35489	M13 240670	2013	B	B: P1.12-1,16: F1-5: ST-485	cc41/44	8	10	1	4	4	1	0.96	-	0.861	2	1
35490	M13 240671	2013	B	B: P1.19-2,13-2: F3-9: ST-1946	cc461	192	#N/A	2	71	47	3	-	0.961	-	1	1
35491	M13 240673	2013	Y	Y: P1.5-1,10-4: F1-7: ST-23	cc23	11	108	14	1034	147	2	-	0.858	-	100	1
35492	M13 240675	2013	B	B: P1.7-2,4: F5-8: ST-1475	cc41/44	9	323	1	14	14	1	0.917	-	0.907	1	1
35493	M13 240677	2013	B	B: P1.21,16: F1-15: ST-11245	Unassigned	9	10	1	19	19	2	-	0.888	-	1	2
35494	M13 240684	2013	B	B: P1.19-1,15-11: F5-1: ST-8004	cc269	3	120	4	15	15	1	0.859	-	0.916	4	2
35495	M13 240686	2013	B	B: P1.22,9: F5-2: ST-11246	cc269	8	30	1	1029	827	1	0.992	-	0.861	101	1
35496	M13 240690	2013	B	B: P1.7-2,4: F1-5: ST-ND	Unassigned	9	10	1	4	4	1	0.96	-	0.861	2	1
35497	M13 240692	2013	B	B: P1.7-2,4: F3-3: ST-41	cc41/44	9	10	1	4	4	1	0.96	-	0.861	102	6
35498	M13 240693	2013	B	B: P1.18-1,30-3: F3-3: ST-32	cc32	6	232	19	593	510	1	0.893	-	0.897	28	8
35499	M13 240694	2013	Y	Y: P1.5-1,10-1: F4-1: ST-ND	Unassigned	11	35	2	25	25	2	-	0.85	-	1	1
35500	M13 240695	2013	B	B: P1.5-1,10-8: F5-13: ST-11	cc11	8	223	16	968	785	1	0.964	-	0.888	5	1
35501	M13 240696	2013	Y	Y: P1.5-1,10-8: F3-6: ST-1627	cc167	1	48	10	23	23	2	-	0.858	-	1	1
35502	M13 240697	2013	B	B: P1.7-1,1: F3-6: ST-11	cc11	8	105	7	528	453	1	0.941	-	0.85	5	1
35503	M13 240698	2013	B	B: P1.7-2,4: F1-5: ST-41	cc41/44	9	9	2	4	4	1	0.96	-	0.861	2	1
35504	M13 240699	2013	B	B: P1.7-2,4: F1-5: ST-41	cc41/44	9	533	8	325	278	1	0.929	-	0.869	103	5
35505	M13 240702	2013	B	B: P1.22-1,14: F4-1: ST-35	cc35	6	534	1	14	14	1	0.917	-	0.907	1	4
35506	M13 240703	2013	B	B: P1.19-1,15-11: F5-1: ST-269	cc269	8	120	4	15	15	1	0.859	-	0.916	4	2
35507	M13 240705	2013	W	W: P1.5,2: F1-1: ST-11	cc11	8	10	1	22	22	2	-	0.854	-	1	1
35508	M13 240706	2013	Y	Y: P1.5-1,10-4: F4-1: ST-23	cc23	11	35	2	25	25	2	-	0.85	-	1	1
35509	M13 240708	2013	B	B: P1.7-2,4: F1-5: ST-41	cc41/44	9	13	1	14	14	1	0.917	-	0.907	1	1
35510	M13 240709	2013	B	B: P1.17,16-3: F5-7: ST-136	cc41/44	9	302	15	931	765	1	0.919	-	0.892	9	5
35511	M13 240710	2013	B	B: P1.21,16: F3-3: ST-60	cc60	3	8	1	1032	13	1	0.937	-	0.88	3	1
35512	M13 240715	2013	B	B: P1.22,14: F1-7: ST-575	cc213	82	8	1	13	13	1	0.937	-	0.88	3	1
35513	M13 240716	2013	Y	Y: P1.5-1,10-4: F4-1: ST-23	cc23	11	35	2	25	25	2	-	0.85	-	1	1
35514	M13 240717	2013	B	B: P1.22,14: F5-5: ST-213	cc213	36	125	1	65	45	3	-	1	-	8	1
35515	M13 240718	2013	B	B: P1.19-1,15-11: F5-1: ST-269	cc269	8	120	4	15	15	1	0.859	-	0.916	4	2
35516	M13 240719	2013	B	B: P1.22,14: F5-5: ST-213	cc213	36	10	1	4	4	1	0.96	-	0.861	2	1
35517	M13 240720	2013	Y	Y: P1.5-1,10-8: F5-1: ST-114	cc22	11	9	2	16	16	2	-	0.881	-	1	1
35518	M13 240721	2013	Y	Y: P1.5-1,10-1: F4-1: ST-1655	cc23	11	35	2	25	25	2	-	0.85	-	1	1
35519	M13 240723	2013	B	B: P1.7-2,16: F3-3: ST-11250	cc32	6	535	1	33	31	3	-	0.965	-	9	1
35520	M13 240725	2013	Y	Y: P1.5-1,10-4: F4-1: ST-1655	cc23	11	35	2	25	25	2	-	0.85	-	1	1
35521	M13 240729	2013	B	B: P1.18-1,3: F5-5: ST-213	cc213	36	1	1	65	45	3	-	1	-	11	1
35522	M13 240731	2013	B	B: P1.22,14: F5-5: ST-213	cc213	36	108	14	33	31	3	-	0.965	-	9	5
35523	M13 240733	2013	Y	Y: P1.5-1,10-8: F3-6: ST-11254	cc167	9	9	2	16	16	2	-	0.881	-	1	1
35524	M13 240734	2013	C	C: P1.5,2: F1-7: ST-9923	cc60	3	8	1	13	13	1	0.937	-	0.88	3	1
35525	M13 240737	2013	B	B: P1.22,9: F3-60: ST-1161	cc269	38	11	3	13	13	1	0.937	-	0.88	3	1
35526	M13 240738	2013	B	B: P1.12-1,16: F1-5: ST-485	cc41/44	8	10	1	4	4	1	0.96	-	0.861	2	1
35527	M13 240739	2013	B	B: P1.22,14: F3-6: ST-2101	cc213	3	125	1	65	45	3	-	1	-	11	1
35528	M13 240740	2013	B	B: P1.5,10-1: F5-1: ST-8023	cc103	194	35	2	25	25	2	-	0.85	-	1	1
35529	M13 240742	2013	B	B: P1.18-1,3: F5-12: ST-11330	Unassigned	38	11	3	13	13	1	0.937	-	0.88	3	1
35530	M13 240743	2013	B	B: P1.21,16: F1-5: ST-11259	Unassigned	9	35	2	142	134	2	-	0.854	-	1	1
35531	M13 240744	2013	Y	Y: P1.5-1,10-1: F4-1: ST-ND	Unassigned	11	35	2	25	25	2	-	0.85	-	1	1
35532	M13 240745	2013	B	B: P1.12-1,16: F1-5: ST-485	cc41/44	8	10	1	4	4	1	0.96	-	0.861	2	1
35533	M13 240746	2013	B	B: P1.7-2,4: F1-80: ST-2799	cc41/44	9	30	1	4	4	1	0.96	-	0.861	2	10
35534	M13 240748	2013	B	B: P1.22,9: F-ND: ST-11261	cc269	607	30	1	19	19	2	-	0.888	-	104	1
35535	M13 240749	2013	Y	Y: P1.5-1,10-1: F4-1: ST-1655	cc23	11	35	2	25	25	2	-	0.85	-	1	1
35536	M13 240750	2013	Y	Y: P1.5-1,10-1: F4-1: ST-1655	cc23	11	35	2	25	25	2	-	0.85	-	1	1
35537	M13 240751	2013	Y	Y: P1.5-1,10-1: F4-1: ST-1655	cc23	11	35	2	25	25	2	-	0.85	-	1	1
35538	M13 240752	2013	Y	Y: P1.5-2,10-1: F4-1: ST-23	cc23	11	35	2	25	25	2	-	0.85	-	1	1
35539	M13 240753	2013	B	B: P1.18-1,14: F1-5: ST-1194	cc41/44	11	10	1	4	4	1	0.96	-	0.861	2	1
35540	M13 240755	2013	B	B: P1.22,14: F1-2: ST-11262	cc213	36	536	30	68	13	1	0.937	-	0.88	3	1
35541	M14 240003	2014	B	B: P1.22,26: F1-5: ST-11263	cc41/44	9	10	1	262	260	1	0.933	-	0.876	1	1
35542	M14 240008	2014	B	B: P1.7-2,4: F3-6: ST-11265	cc41/44	9	105	7	281	14	1	0.917	-	0.907	5	1
35543	M14 240010	2014	Y	Y: P1.5-1,10-4: F4-1: ST-23	cc23	11	35	2	25	25	2	-	0.85	-	1	1
35544	M14 240011	2014	B	B: P1.22,9: F5-12: ST-1161	cc269	38	11	3	13	13	1	0.937	-	0.88	3	1
35545	M14 240012	2014	Y	Y: P1.5-1,10-1: F4-1: ST-1655	cc23	11	35	2	25	25	2	-	0.85	-	1	1
35546	M14 240014	2014	B	B: P1.7,16-32: F3-3: ST-32	cc32	6	3	5	1	1	1	1	-	0.861	6	7
35547	M14 240015	2014	Y	Y: P1.5-1,10-4: F3-4: ST-1624	cc167	9	48	10	24	24	2	-	0.854	-	1	1
35548	M14 240016	2014	B	B: P1.7-2,4: F1-5: ST-340	cc41/44	3	13	1	14	14	1	0.917	-	0.907	1	1
35549	M14 240017	2014	B	B: P1.7-2,4: F1-5: ST-3446	cc41/44	9	10	1	4	4	1	0.96	-	0.861	2	1
35550	M14 240018	2014	B	B: P1.7-2,13-2: F4-1: ST-6782	cc41/44	17	13	1	14	14	1	0.917	-	0.907	7	1
35551	M14 240020	2014	C	C: P1.18-1,3: F3-9: ST-5133	cc103	5	10	1	19	19	2	-	0.888	-	1	2
35552	M14 240021	2014	B	B: P1.7-2,4: F1-5: ST-5981	cc41/44	9	113	6	4	4	1	0.96	-	0.861	2	1
35553	M14 240023	2014	Y	Y: P1.5-1,10-1: F4-1: ST-ND	Unassigned	11	35	2	25	25	2	-	0.85	-	1	1
35555	M14 240025	2014	B	B: P1.5-1,10-1: F5-12: ST-1161	cc269	38	11	3	13	13	1	0.937	-	0.88	3	1
35556	M14 240027	2014	B	B: P1.7-2,4: F1-5: ST-1403	cc41/44	9	13	1	14	14	1	0.917	-	0.907	7	1
35557	M14 240028	2014	B	B: P1.7-2,16-26: F3-3: ST-2506	cc32	5	270	2	272	224	1	0.9	-	0.953	15	1
35558	M14 240030	2014	B	B: P1.22,14: F1-7: ST-575	cc213	82	8	1	13	13	1	0.937	-	0.88	3	1
35559	M14 240037	2014	B	B: P1.22,9: F1-7: ST-9242	cc269	38	29	1	24	24	2	-	0.854	-	1	4
35560	M14 240038	2014	W	W: P1.18-1,3: F4-1: ST-2638	cc22	11	9	2	16	16	2	-	0.881	-	1	1
35561	M14 240039	2014	B	B: P1.7-2,4: F1-5: ST-ND	Unassigned	9	10	1	4	4	1	0.96	-	0.861	2	1
35562	M14 240045	2014	B	B: P1.7-2,4: F1-5: ST-41	cc41/44	9	10	1	4	4	1	0.96	-	0.861	2	1
35563	M14 240046	2014	B	B: P1.12-1,9: F1-5: ST-41	cc41/44	9	10	1	4	4	1	0.96	-	0.861	2	1
35564	M14 240048	2014	B	B: P1.19,15: F4-28: ST-34	cc32	5	242	5	1	1	1	1	-	0.861	6	3
35565	M14 240049	2014	Y	Y: P1.5-1,10-4: F4-1: ST-1655	cc23	11	35	2	25	25	2	-	0.85	-	1	1
35566	M14 240055	2014	B	B: P1.7-2,4: F1-5: ST-154	cc41/44	11	10	1	4	4	1	0.96	-	0.861	2	1
35567	M14 240056	2014	Y	Y: P1.5-1,10-1: F4-1: ST-1655	cc23	11	35	2	25	25	2	-	0.85	-	1	1
35568	M14 240059	2014	B	B: P1.22,9: F5-12: ST-9180	cc269	608	11	3	13	13	1	0.937	-	0.88	3	1
35569	M14 240060	2014	Y	Y: P1.5-1,10-1: F4-1: ST-1655	cc23	11	35	2	25	25	2	-	0.85	-	1	1
35570	M14 240061	2014	B	B: P1.7-2,16: F5-50: ST-283	cc269	8	120	4	15	15	1	0.859	-	0.916	4	2
35571	M14 240062	2014	B	B: P1.5-2,10: F5-1: ST-34	cc32	5	3	5	1	1	1	1	-	0.861	6	3
35572	M14 240073	2014	B	B: P1.22,9: F5-12: ST-275	cc269	38	120	4	15	15	1	0.859	-	0.916	4	2
35573	M14 240074	2014	B	B: P1.7-2,4: F1-5: ST-11266	cc41/44	3	120	4	1026	651	3	-	0.923	-	4	2
35574	M14 240075	2014	Y	Y: P1.5-1,10-1: F4-1: ST-1655	cc23	11	35	2	25	25	2	-	0.85	-	1	1
35575	M14 240077	2014	B	B: P1.22,14-6: F5-1: ST-34	cc32	5	3	5	1	1	1	1	-	0.861	6	3
35576	M14 240078	2014	B	B: P1.22,14: F5-36: ST-213	cc213	36	125	1	65	45	3	-	1	-	11	1
35578	M14 240085	2014	B	B: P1.7-2,4: F1-18: ST-5098	cc41/44	9	10	1	4	4	1	0.96	-	0.861	2	1
35579	M14 240087	2014	B	B: P1.22,14: F5-9: ST-3116	cc213	36	1	1	65	45	3	-	1	-	8	1
35580	M14 240088	2014	B	B: P1.5,2: F3-9: ST-461	cc461	60	127	2	71	47	3	-	0.961	-	1	1
35581	M14 240090	2014	W	W: P1.5,2: F1-1: ST-11	cc11	8	10	1	22	22	2	-	0.854	-	1	1
35582	M14 240091	2014	Y	Y: P1.5-1,10-1: F4-1: ST-1655	cc23	11	35	2	25	25	2	-	0.85	-	1	1
35583	M14 240093	2014	B	B: P1.18-1,3: F3-1: ST-11272	cc18	10	18	1	36	37	1	0.937	-	0.847	1	1
35585	M14 240096	2014	B	B: P1.7-2,4: F1-5: ST-3447	cc41/44	9	13	1	14	14	1	0.917	-	0.907	7	1
35586	M14 240098	2014	B	B: P1.18-1,3: F3-3: ST-41	cc41/44	9	10	1	4	4	1	0.96	-	0.861	2	6
35587	M14 240099	2014	B	B: P1.22,9: F1-7: ST-6789	cc269	3	30	1	19	19	2	-	0.888	-	1	1
35588	M14 240101	2014	B	B: P1.19,15: F5-1: ST-749	cc32	6	3	5	1	1	1	1	-	0.861	6	3
35589	M14 240103	2014	B	B: P1.7,16: F3-3: ST-32	cc32	6	30	1	1031	94	3	-	0.957	-	105	1
35592	M14 240108	2014	Y	Y: P1.5-1,10-1: F4-1: ST-1655	cc23	11	35	2	25	25	2	-	0.85	-	1	1
35593	M14 240109	2014	C	C: P1.19-1,15-11: F1-7: ST-467	cc269	8	120	4	15	15	1	0.859	-	0.916	4	2
35594	M14 240110	2014	B	B: P1.7-2,4: F5-8: ST-1475	cc41/44	9	323	1	14	14	1	0.917	-	0.907	1	1
35595	M14 240111	2014	Y	Y: P1.5-1,10-1: F4-1: ST-1655	cc23	11	35	2	25	25	2	-	0.85	-	1	1
35596	M14 240112	2014	Y	Y: P1.5-1,10-4: F4-1: ST-1655	cc23	11	537	2	25	25	2	-	0.85	-	1	1
35598	M14 240116	2014	W	W: P1.5,2: F1-1: ST-11	cc11	8	10	1	22	22	2	-	0.854	-	1	1
35599	M14 240117	2014	Y	Y: P1.5-1,10-4: F4-1: ST-1655	cc23	11	35	2	25	25	2	-	0.85	-	1	1
35600	M14 240118	2014	Y	Y: P1.5-2,10-1: F4-1: ST-23	cc23	11	35	2	25	25	2	-	0.85	-	1	1
35601	M14 240119	2014	B	B: P1.5,2: F3-1: ST-282	cc282	2	47	12	69	84	3	-	0.965	-	13	1
35602	M14 240120	2014	Y	Y: P1.5-8,10-4: F5-7: ST-ND	Unassigned	9	112	1	72	19	2	-	0.888	-	1	1
35603	M14 240121	2014	B	B: P1.22,14: F-ND: ST-213	cc213	36	5	1	102	102	2	-	0.842	-	8	1
35604	M14 240122	2014	B	B: P1.19,15: F5-1: ST-33	cc32	6	3	5	1	1	1	1	-	0.861	6	3
35605	M14 240123	2014	B	B: P1.21,16: F3-6: ST-2455	cc60	3	8	1	13	13	1	0.937	-	0.88	3	1
35606	M14 240124	2014	B	B: P1.7-2,4: F1-18: ST-5480	cc41/44	11	10	1	4	4	1	0.96	-	0.861	2	1
35609	M14 240127	2014	B	B: P1.7-2,4: F1-5: ST-9819	cc41/44	3	195	9	281	14	1	0.917	-	0.907	5	1
35610	M14 240129	2014	W	W: P1.5-1,10-8: F4-1: ST-1617	cc22	11	9	2	16	16	2	-	0.881	-	1	1
35611	M14 240130	2014	Y	Y: P1.5-1,10-4: F4-1: ST-ND	Unassigned	11	35	2	25	25	2	-	0.85	-	1	1
35612	M14 240133	2014	B	B: P1.19-2,13-1: F3-9: ST-1946	cc461	192	11	3	68	13	1	0.937	-	0.88	3	1
35613	M14 240134	2014	B	B: P1.7-2,4: F5-17: ST-41	cc41/44	9	538	58	1028	826	3	-	0.935	-	106	1
35614	M14 240135	2014	W	W: P1.5,2: F1-1: ST-11	cc11	8	10	1	22	22	2	-	0.854	-	1	1
35615	M14 240136	2014	Y	Y: P1.5-1,10-10: F4-1: ST-1655	cc23	11	35	2	25	25	2	-	0.85	-	1	1
35616	M14 240140	2014	Y	Y: P1.5-1,10-4: F4-1: ST-23	cc23	11	35	2	25	25	2	-	0.85	-	1	1
35617	M14 240141	2014	B	B: P1.7-2,4: F1-5: ST-ND	Unassigned	9	10	1	4	4	1	0.96	-	0.861	2	1
35618	M14 240142	2014	W	W: P1.5,2: F1-1: ST-11	cc11	8	539	8	239	256	1	0.93	-	0.9	15	5
35619	M14 240143	2014	B	B: P1.7,16: F3-3: ST-11278	cc32	722	3	5	1	1	1	1	-	0.861	6	7
35620	M14 240144	2014	Y	Y: P1.5-1,10-1: F4-1: ST-1655	cc23	11	35	2	25	25	2	-	0.85	-	1	1
35621	M14 240145	2014	W	W: P1.5,2: F1-1: ST-11	cc11	8	10	1	22	22	2	-	0.854	-	1	1
35622	M14 240147	2014	W	W: P1.5,2: F1-1: ST-11	cc11	8	10	1	928	762	1	0.915	-	0.915	1	1
35623	M14 240149	2014	B	B: P1.22,9: F5-12: ST-1161	cc269	38	11	3	13	13	1	0.937	-	0.88	3	1
35624	M14 240150	2014	W	W: P1.5,2: F1-1: ST-11	cc11	8	10	1	22	22	2	-	0.854	-	1	1
35625	M14 240153	2014	B	B: P1.7-2,4: F1-5: ST-2314	cc41/44	9	10	1	4	4	1	0.96	-	0.861	2	1
35626	M14 240154	2014	B	B: P1.7-2,4: F1-5: ST-8988	Unassigned	3	120	4	73	86	1	0.84	-	0.923	4	2
35627	M14 240157	2014	Y	Y: P1.5-1,10-1: F4-1: ST-1655	cc23	11	35	2	25	25	2	-	0.85	-	1	1
35628	M14 240168	2014	C	C: P1.5,2: F3-3: ST-11	cc11	8	1	1	22	22	2	-	0.854	-	1	1
35629	M14 240174	2014	B	B: P1.7-2,4: F1-5: ST-11279	cc41/44	79	30	1	4	4	1	0.96	-	0.861	2	1
35630	M14 240175	2014	B	B: P1.19-1,15-11: F5-1: ST-269	cc269	8	324	35	15	15	1	0.859	-	0.916	4	2
35631	M14 240177	2014	B	B: P1.22,9: F5-12: ST-1161	cc269	38	11	3	13	13	1	0.937	-	0.88	3	1
35632	M14 240178	2014	W	W: P1.5,2: F1-1: ST-11	cc11	8	10	1	22	22	2	-	0.854	-	1	1
35633	M14 240179	2014	B	B: P1.19-1,15-11: F1-7: ST-467	cc269	8	120	4	15	15	1	0.859	-	0.916	4	2
35634	M14 240180	2014	W	W: P1.5,2: F1-1: ST-11	cc11	8	10	1	22	22	2	-	0.854	-	1	1
35635	M14 240199	2014	W	W: P1.5,2: F1-146: ST-11	cc11	8	540	1	1030	13	1	0.937	-	0.88	1	1
35636	M14 240201	2014	B	B: P1.17,16-3: F5-1: ST-1774	cc269	14	120	4	149	143	3	-	0.965	-	4	2
35637	M14 240202	2014	Y	Y: P1.5-1,10-10: F4-1: ST-11280	cc23	11	11	3	68	13	1	0.937	-	0.88	3	1
35638	M14 240204	2014	W	W: P1.5,2: F1-1: ST-11	cc11	8	10	1	22	22	2	-	0.854	-	1	1
35639	M14 240205	2014	B	B: P1.22,14: F5-5: ST-4145	cc213	36	541	59	1033	828	1	0.941	-	0.884	107	26
35640	M14 240206	2014	B	B: P1.22,9: F5-12: ST-1161	cc269	38	11	3	13	13	1	0.937	-	0.88	3	1
35641	M14 240208	2014	NG	NG: P1.21-7,16: F5-36: ST-11282	cc1157	21	11	3	68	13	1	0.937	-	0.88	3	1
35642	M14 240210	2014	Y	Y: P1.5-1,10-4: F4-1: ST-23	cc23	11	35	2	25	25	2	-	0.85	-	1	1
35643	M14 240211	2014	W	W: P1.5,2: F1-1: ST-11	cc11	8	10	1	22	22	2	-	0.854	-	1	1
35644	M14 240213	2014	B	B: P1.21-7,16: F5-36: ST-ND	Unassigned	21	11	3	68	13	1	0.937	-	0.88	3	1
35645	M14 240215	2014	B	B: P1.22,14: F1-31: ST-213	cc213	36	125	1	65	45	3	-	1	-	47	1
35646	M14 240217	2014	B	B: P1.17-1,23: F1-5: ST-1423	cc41/44	9	120	4	837	683	2	-	0.938	-	4	2
35647	M14 240218	2014	B	B: P1.18-1,30-3: F3-3: ST-7460	cc32	6	232	19	593	510	1	0.893	-	0.897	28	8
35648	M14 240220	2014	Y	Y: P1.5-1,10-1: F4-1: ST-ND	Unassigned	11	35	2	25	25	2	-	0.85	-	1	1
35649	M14 240221	2014	Y	Y: P1.5-1,10-4: F4-1: ST-ND	Unassigned	11	35	2	25	25	2	-	0.85	-	1	1
35650	M14 240222	2014	C	C: P1.5-1,10-8: F3-6: ST-11	cc11	8	105	7	13	13	1	0.937	-	0.88	5	1
35651	M14 240223	2014	W	W: P1.5,2: F1-1: ST-11	cc11	8	10	1	22	22	2	-	0.854	-	1	1
35652	M14 240224	2014	C	C: P1.12-1,16: F1-5: ST-ND	Unassigned	8	10	1	4	4	1	0.96	-	0.861	2	1
35653	M14 240225	2014	Y	Y: P1.5-1,10-10: F4-1: ST-1655	cc23	11	35	2	25	25	2	-	0.85	-	1	1
35654	M14 240226	2014	Y	Y: P1.5-1,10-1: F4-1: ST-ND	Unassigned	11	35	2	25	25	2	-	0.85	-	1	1
35655	M14 240227	2014	B	B: P1.19,15: F5-1: ST-8049	cc32	6	3	5	1	1	1	1	-	0.861	6	3
35656	M14 240232	2014	B	B: P1.18-1,34: F1-5: ST-409	cc41/44	9	10	1	19	19	2	-	0.888	-	1	1
35657	M14 240233	2014	B	B: P1.19-3,15: F1-5: ST-409	cc41/44	9	10	1	209	186	3	-	0.973	-	9	1
35658	M14 240234	2014	B	B: P1.19-1,15-11: F3-7: ST-11291	cc269	8	231	2	15	15	1	0.859	-	0.916	4	1
35659	M14 240236	2014	C	C: P1.5-1,10-1: F5-36: ST-10482	cc11	8	105	7	669	0	1	-	-	-	5	1
35660	M14 240237	2014	Y	Y: P1.5-1,10-1: F4-1: ST-1655	cc23	11	35	2	25	25	2	-	0.85	-	1	1
35661	M14 240238	2014	W	W: P1.18-1,3: F4-1: ST-22	cc22	11	47	12	69	84	3	-	0.965	-	12	1
35662	M14 240241	2014	B	B: P1.22,9: F5-12: ST-275	cc269	38	30	1	19	19	2	-	0.888	-	1	1
35663	M14 240242	2014	B	B: P1.22,14: F5-9: ST-162	cc162	26	13	1	845	700	1	0.913	-	0.903	7	1
35664	M14 240245	2014	W	W: P1.5,2: F1-1: ST-11292	cc11	8	10	1	22	22	2	-	0.854	-	1	1
35665	M14 240246	2014	Y	Y: P1.5-2,10-1: F4-1: ST-11293	cc23	11	35	2	25	25	2	-	0.85	-	1	1
35666	M14 240248	2014	B	B: P1.7,16: F3-3: ST-32	cc32	6	3	5	1	1	1	1	-	0.861	6	7
35667	M14 240249	2014	B	B: P1.5-1,10-8: F4-1: ST-11	cc11	8	105	7	1023	823	1	0.96	-	0.873	5	1
35668	M14 240251	2014	B	B: P1.22,14: F5-9: ST-162	cc162	26	13	1	845	700	1	0.913	-	0.903	7	1
35669	M14 240252	2014	B	B: P1.22,9: F5-12: ST-1161	cc269	38	11	3	13	13	1	0.937	-	0.88	3	1
35670	M14 240253	2014	W	W: P1.5,2: F1-1: ST-11	cc11	8	10	1	22	22	2	-	0.854	-	1	1
35671	M14 240254	2014	B	B: P1.22,14-6: F1-5: ST-ND	Unassigned	26	13	1	14	14	1	0.917	-	0.907	7	1
35672	M14 240255	2014	C	C: P1.5,2: F3-3: ST-11	cc11	8	1	1	22	22	2	-	0.854	-	1	1
35673	M14 240256	2014	B	B: P1.18-1,3: F1-5: ST-1194	cc41/44	11	10	1	724	608	1	0.956	-	0.857	2	1
35674	M14 240257	2014	W	W: P1.5,2: F1-1: ST-11	cc11	8	10	1	22	22	2	-	0.854	-	1	1
35675	M14 240258	2014	W	W: P1.5,2: F1-1: ST-11	cc11	8	10	1	22	22	2	-	0.854	-	1	1
35676	M14 240259	2014	B	B: P1.22,14-3: F5-9: ST-11295	cc162	26	30	1	21	21	2	-	0.854	-	1	1
35677	M14 240261	2014	B	B: P1.22,9: F5-12: ST-1161	cc269	38	11	3	13	13	1	0.937	-	0.88	3	1
35678	M14 240264	2014	B	B: P1.22,14: F5-5: ST-ND	Unassigned	36	125	1	65	45	3	-	1	-	11	1
35679	M14 240265	2014	B	B: P1.19-1,15-11: F5-1: ST-1089	cc269	8	120	4	15	15	1	0.859	-	0.916	4	2
35680	M14 240266	2014	B	B: P1.22,10-1: F5-12: ST-275	cc269	38	30	1	19	19	2	-	0.888	-	1	1
35681	M14 240267	2014	B	B: P1.7-2,4: F5-25: ST-41	cc41/44	9	113	6	4	4	1	0.96	-	0.861	2	1
35682	M14 240271	2014	B	B: P1.19,30: F5-1: ST-34	cc32	5	3	5	1	1	1	1	-	0.861	6	3
35683	M14 240273	2014	B	B: P1.7-2,16: F3-3: ST-1096	cc32	6	542	8	48	62	1	0.945	-	0.88	35	8
35684	M14 240276	2014	Y	Y: P1.5-1,10-1: F4-1: ST-1655	cc23	11	35	2	25	25	2	-	0.85	-	1	1
35685	M14 240277	2014	Y	Y: P1.5-1,10-8: F1-3: ST-767	cc167	16	48	10	23	23	2	-	0.858	-	1	1
35686	M14 240278	2014	W	W: P1.5,2: F1-1: ST-11	cc11	8	10	1	22	22	2	-	0.854	-	1	1
35687	M14 240279	2014	W	W: P1.5,2: F1-1: ST-10651	cc11	8	10	1	22	22	2	-	0.854	-	1	1
35688	M14 240280	2014	C	C: P1.5,2: F3-3: ST-11	cc11	8	1	1	22	22	2	-	0.854	-	1	1
35689	M14 240282	2014	W	W: P1.5-1,10-1: F1-1: ST-11	cc11	8	10	1	22	22	2	-	0.854	-	1	1
35690	M14 240283	2014	W	W: P1.5,2: F1-1: ST-11	cc11	8	10	1	22	22	2	-	0.854	-	1	1
35691	M14 240284	2014	Y	Y: P1.5-1,10-1: F4-1: ST-ND	Unassigned	11	35	2	25	25	2	-	0.85	-	1	1
35692	M14 240285	2014	Y	Y: P1.5-1,10-1: F4-1: ST-1655	cc23	11	35	2	25	25	2	-	0.85	-	1	1
35693	M14 240286	2014	C	C: P1.5-1,10-8: F3-6: ST-11	cc11	8	105	7	669	0	1	-	-	-	5	1
35694	M14 240287	2014	Y	Y: P1.5-1,10-1: F4-1: ST-1655	cc23	11	35	2	25	25	2	-	0.85	-	1	1
35695	M14 240289	2014	B	B: P1.18-1,3: F5-8: ST-5391	Unassigned	9	13	1	14	14	1	0.917	-	0.907	1	1
35696	M14 240291	2014	Y	Y: P1.5-1,10-4: F4-1: ST-1655	cc23	11	35	2	25	25	2	-	0.85	-	1	1
35697	M14 240293	2014	Y	Y: P1.5-1,10-22: F5-1: ST-114	cc22	11	9	2	16	16	2	-	0.881	-	1	1
35698	M14 240295	2014	B	B: P1.7-1,1: F5-36: ST-11296	cc60	3	543	25	68	13	1	0.937	-	0.88	3	1
35699	M14 240296	2014	B	B: P1.5,2: F5-5: ST-4786	cc32	6	111	1	151	144	1	0.996	-	0.857	1	4
35700	M14 240299	2014	W	W: P1.5,2: F1-1: ST-10651	cc11	8	10	1	22	22	2	-	0.854	-	1	1
35701	M14 240300	2014	B	B: P1.22,9: F5-12: ST-275	cc269	38	30	1	19	19	2	-	0.888	-	1	1
35702	M14 240304	2014	W	W: P1.5,2: F1-1: ST-11	cc11	8	10	1	22	22	2	-	0.854	-	1	1
35703	M14 240305	2014	B	B: P1.22,14: F1-7: ST-213	cc213	36	125	1	65	45	3	-	1	-	8	1
35704	M14 240306	2014	B	B: P1.7-2,4: F1-5: ST-8511	cc41/44	17	195	9	281	14	1	0.917	-	0.907	5	1
35705	M14 240309	2014	B	B: P1.7-2,4: F1-5: ST-11297	cc41/44	723	13	1	14	14	1	0.917	-	0.907	1	1
35706	M14 240310	2014	C	C: P1.5,2: F3-6: ST-11	cc11	8	105	7	82	78	1	0.964	-	0.869	5	1
35707	M14 240311	2014	C	C: P1.7-4,14-6: F3-9: ST-11298	cc334	3	204	1	19	19	2	-	0.888	-	1	1
35708	M14 240312	2014	B	B: P1.12-1,13-1: F5-5: ST-2922	cc41/44	14	9	2	19	19	2	-	0.888	-	1	1
35709	M14 240313	2014	Y	Y: P1.5-1,10-1: F4-1: ST-1655	cc23	11	35	2	25	25	2	-	0.85	-	1	1
35710	M14 240314	2014	B	B: P1.21,16: F5-8: ST-60	cc60	3	8	1	13	13	1	0.937	-	0.88	3	1
35712	M14 240316	2014	B	B: P1.22,16-46: F5-5: ST-213	cc213	36	125	1	65	45	3	-	1	-	8	1
35713	M14 240317	2014	B	B: P1.19-2,13-3: F3-9: ST-1946	cc461	192	127	2	71	47	3	-	0.961	-	1	1
35714	M14 240319	2014	B	B: P1.22,14: F5-12: ST-11299	Unassigned	3	125	1	19	19	2	-	0.888	-	108	1
35715	M14 240321	2014	B	B: P1.22,14: F5-2: ST-11300	cc213	21	125	1	65	45	3	-	1	-	14	1
35716	M14 240325	2014	B	B: P1.22,9: F5-12: ST-1161	cc269	38	544	32	1025	824	3	-	0.938	-	46	1
35717	M14 240327	2014	Y	Y: P1.5-1,2-59: F1-5: ST-910	Unassigned	26	545	2	24	24	2	-	0.854	-	1	1
35718	M14 240328	2014	B	B: P1.22,14: F5-2: ST-213	cc213	36	202	15	30	30	3	-	0.931	-	17	11
35719	M14 240331	2014	B	B: P1.7-2,4: F1-5: ST-5981	cc41/44	9	113	6	4	4	1	0.96	-	0.861	2	1
35720	M14 240333	2014	B	B: P1.12-1,13-1: F5-7: ST-11301	Unassigned	58	114	60	1035	829	1	0.911	-	0.9	15	4
35721	M14 240335	2014	Y	Y: P1.5-1,10-1: F4-1: ST-11331	cc23	6	35	2	25	25	2	-	0.85	-	1	1
35722	M14 240337	2014	W	W: P1.5,2: F1-1: ST-11	cc11	8	10	1	22	22	2	-	0.854	-	1	1
35723	M14 240338	2014	B	B: P1.22,9: F1-7: ST-1159	Unassigned	38	30	1	19	19	2	-	0.888	-	109	1
35724	M14 240342	2014	B	B: P1.19,15: F4-28: ST-11302	cc32	5	3	5	1	1	1	1	-	0.861	6	3
35725	M14 240343	2014	W	W: P1.5,2: F1-1: ST-11	cc11	8	10	1	22	22	2	-	0.854	-	1	1
35726	M14 240344	2014	B	B: P1.22,9: F5-12: ST-275	cc269	38	30	1	19	19	2	-	0.888	-	1	1
35727	M14 240345	2014	B	B: P1.19-2,13-2: F3-9: ST-1946	cc461	192	127	2	71	47	3	-	0.961	-	1	1
35728	M14 240346	2014	W	W: P1.5,2: F1-1: ST-11	cc11	8	10	1	22	22	2	-	0.854	-	1	1
35729	M14 240347	2014	B	B: P1.12-1,13-2: F5-37: ST-ND	Unassigned	9	10	1	19	19	2	-	0.888	-	1	1
35730	M14 240350	2014	B	B: P1.19,15: F5-1: ST-5151	Unassigned	6	3	5	1	1	1	1	-	0.861	6	3
35731	M14 240351	2014	W	W: P1.5,2: F1-1: ST-11	cc11	8	10	1	22	22	2	-	0.854	-	1	1
35732	M14 240353	2014	B	B: P1.7-2,4: F1-5: ST-1194	cc41/44	11	10	1	4	4	1	0.96	-	0.861	2	1
35733	M14 240354	2014	B	B: P1.18-1,14: F1-5: ST-213	cc213	36	125	1	65	45	3	-	1	-	8	1
35734	M14 240356	2014	B	B: P1.19-1,13-1: F3-9: ST-461	cc461	60	127	2	71	47	3	-	0.961	-	1	1
35735	M14 240357	2014	B	B: P1.7-2,&Delta;: F1-5: ST-41	cc41/44	9	13	1	14	14	1	0.917	-	0.907	7	1
35736	M14 240359	2014	B	B: P1.7-2,4: F3-7: ST-11303	Unassigned	17	30	1	606	31	3	-	0.965	-	49	1
35737	M14 240360	2014	B	B: P1.22,9: F5-12: ST-11304	cc269	38	30	1	19	19	2	-	0.888	-	1	1
35738	M14 240361	2014	W	W: P1.18-1,3: F4-1: ST-ND	Unassigned	11	9	2	16	16	2	-	0.881	-	1	1
35739	M14 240365	2014	B	B: P1.19-2,13-1: F3-9: ST-461	cc461	60	127	2	655	187	3	-	0.98	-	1	1
35740	M14 240367	2014	B	B: P1.19-1,15-11: F5-36: ST-269	cc269	8	120	4	15	15	1	0.859	-	0.916	10	2
35741	M14 240368	2014	B	B: P1.7-2,4: F1-5: ST-ND	Unassigned	83	13	1	14	14	1	0.917	-	0.907	1	1
35742	M14 240369	2014	B	B: P1.21,16: F3-6: ST-4051	Unassigned	26	33	1	4	4	1	0.96	-	0.861	2	1
35744	M14 240374	2014	B	B: P1.17,16-28: F5-5: ST-ND	Unassigned	9	546	29	435	366	3	-	0.969	-	110	1
35745	M14 240377	2014	W	W: P1.5,2: F1-1: ST-ND	Unassigned	8	10	1	22	22	2	-	0.854	-	1	1
35746	M14 240378	2014	Y	Y: P1.5-1,10-4: F4-1: ST-1655	cc23	11	35	2	25	25	2	-	0.85	-	1	1
35747	M14 240379	2014	B	B: P1.22,14: F5-5: ST-213	cc213	36	532	2	1024	499	3	-	0.973	-	24	1
35748	M14 240382	2014	B	B: P1.22,9: F1-6: ST-8061	Unassigned	38	30	1	19	19	2	-	0.888	-	1	1
35749	M14 240383	2014	B	B: P1.19,15: F1-19: ST-33	cc32	6	547	61	10	10	1	0.929	-	0.88	5	1
35750	M14 240384	2014	B	B: P1.5-1,10-98: F3-9: ST-1946	cc461	192	127	2	71	47	3	-	0.961	-	1	1
35751	M14 240386	2014	B	B: P1.21,16-36: F5-8: ST-ND	Unassigned	26	433	1	136	119	2	-	0.885	-	1	1
35752	M14 240387	2014	B	B: P1.7-2,4-10: F1-5: ST-340	cc41/44	3	13	1	14	14	1	0.917	-	0.907	1	1
35753	M14 240388	2014	B	B: P1.12-1,16: F1-5: ST-ND	Unassigned	8	10	1	4	4	1	0.96	-	0.861	2	1
35754	M14 240389	2014	W	W: P1.5,2: F1-1: ST-11	cc11	8	10	1	22	22	2	-	0.854	-	1	1
35755	M14 240390	2014	B	B: P1.22,9: F5-12: ST-1161	cc269	38	11	3	13	13	1	0.937	-	0.88	3	1
35757	M14 240393	2014	B	B: P1.22,14: F5-5: ST-213	cc213	36	125	1	65	45	3	-	1	-	11	1
35758	M14 240396	2014	B	B: P1.19,15-1: F1-5: ST-43	cc41/44	9	10	1	19	19	2	-	0.888	-	1	1
35759	M14 240400	2014	B	B: P1.18-1,3: F1-5: ST-1194	cc41/44	11	326	36	724	608	1	0.956	-	0.857	2	1
35760	M14 240403	2014	Y	Y: P1.5-1,10-4: F4-1: ST-ND	Unassigned	11	548	2	25	25	2	-	0.85	-	1	1
35761	M14 240404	2014	Y	Y: P1.5-2,10-1: F5-8: ST-23	cc23	11	35	2	25	25	2	-	0.85	-	1	1
35762	M14 240405	2014	C	C: P1.5,2: F3-3: ST-11	cc11	8	1	1	22	22	2	-	0.854	-	1	1
35763	M14 240406	2014	W	W: P1.5,2: F1-1: ST-11	cc11	8	10	1	22	22	2	-	0.854	-	1	1
35764	M14 240407	2014	B	B: P1.7-2,4: F5-8: ST-ND	Unassigned	11	13	1	122	14	1	0.917	-	0.907	7	1
35765	M14 240408	2014	B	B: P1.19-1,15-11: F5-1: ST-269	cc269	8	120	4	15	15	1	0.859	-	0.916	4	2
35766	M14 240410	2014	B	B: P1.12-1,16: F1-24: ST-485	cc41/44	8	10	1	4	4	1	0.96	-	0.861	2	1
35767	M14 240423	2014	Y	Y: P1.5-1,10-1: F4-1: ST-1655	cc23	11	35	2	25	25	2	-	0.85	-	1	1
35768	M14 240425	2014	B	B: P1.22,14: F1-5: ST-5986	cc41/44	11	10	1	4	4	1	0.96	-	0.861	2	1
35770	M14 240428	2014	B	B: P1.22,9: F5-12: ST-1161	cc269	38	11	3	13	13	1	0.937	-	0.88	3	1
35771	M14 240429	2014	B	B: P1.12-1,16: F1-5: ST-485	cc41/44	8	10	1	4	4	1	0.96	-	0.861	2	1
35772	M14 240431	2014	Y	Y: P1.5-1,10-10: F4-1: ST-ND	Unassigned	11	35	2	25	25	2	-	0.85	-	1	1
35773	M14 240432	2014	Y	Y: P1.5-1,2-2: F5-8: ST-ND	Unassigned	11	35	2	25	25	2	-	0.85	-	1	1
35774	M14 240434	2014	B	B: P1.19-1,15-11: F5-1: ST-269	cc269	8	120	4	15	15	1	0.859	-	0.916	4	2
35775	M14 240436	2014	C	C: P1.5,2: F3-3: ST-11	cc11	8	1	1	22	22	2	-	0.854	-	1	1
35776	M14 240437	2014	B	B: P1.21-7,16: F5-36: ST-1157	cc1157	21	11	3	68	13	1	0.937	-	0.88	3	1
35777	M14 240441	2014	C	C: P1.21,2-58: F1-7: ST-11332	cc116	21	549	62	101	101	2	-	0.85	-	38	1
35778	M14 240451	2014	B	B: P1.22,9: F1-28: ST-11305	cc269	38	30	1	19	19	2	-	0.888	-	1	1
35779	M14 240452	2014	B	B: P1.19-1,15-11: F5-1: ST-1214	cc269	8	120	4	15	15	1	0.859	-	0.916	4	2
35780	M14 240455	2014	B	B: P1.12-1,16-117: F1-5: ST-485	cc41/44	8	10	1	4	4	1	0.96	-	0.861	2	1
35781	M14 240456	2014	B	B: P1.19-2,13-2: F3-9: ST-1946	cc461	192	127	2	13	13	1	0.937	-	0.88	3	1
35782	M14 240463	2014	W	W: P1.5,2: F1-1: ST-11	cc11	8	10	1	22	22	2	-	0.854	-	1	1
35783	M14 240465	2014	B	B: P1.22,9: F5-12: ST-11306	Unassigned	38	11	3	13	13	1	0.937	-	0.88	3	1
35784	M14 240466	2014	B	B: P1.22,9: F5-12: ST-11307	Unassigned	38	120	4	15	15	1	0.859	-	0.916	4	2
35785	M14 240467	2014	B	B: P1.19,15: F5-1: ST-8049	cc32	6	3	5	1	1	1	1	-	0.861	6	3
35786	M14 240468	2014	W	W: P1.5,2: F1-1: ST-11	cc11	8	10	1	22	22	2	-	0.854	-	1	1
35787	M14 240469	2014	B	B: P1.22,9: F5-1: ST-11308	cc269	8	120	4	1027	825	1	0.859	-	0.912	4	2
35788	M14 240470	2014	W	W: P1.5,2: F1-1: ST-11	cc11	8	10	1	22	22	2	-	0.854	-	1	1
35789	M14 240471	2014	B	B: P1.22,14-6: F1-5: ST-8054	cc41/44	26	13	1	14	14	1	0.917	-	0.907	7	1
35790	M14 240472	2014	B	B: P1.22,14-6: F1-5: ST-8054	cc41/44	26	13	1	14	14	1	0.917	-	0.907	7	1
35791	M14 240473	2014	W	W: P1.18-1,3: F4-1: ST-22	cc22	11	9	2	16	16	2	-	0.881	-	1	1
35792	M14 240474	2014	W	W: P1.5,2: F1-1: ST-11	cc11	8	10	1	22	22	2	-	0.854	-	1	1
35793	M14 240475	2014	B	B: P1.12-3,4: F3-9: ST-11309	cc41/44	9	550	17	1022	822	1	0.96	-	0.853	36	2
35794	M14 240476	2014	B	B: P1.7-2,4: F1-5: ST-340	cc41/44	3	195	9	281	14	1	0.917	-	0.907	5	1
35795	M14 240477	2014	B	B: P1.12-1,16: F1-5: ST-485	cc41/44	8	10	1	4	4	1	0.96	-	0.861	2	1
35796	M14 240478	2014	W	W: P1.5,2: F1-1: ST-11	cc11	8	10	1	22	22	2	-	0.854	-	1	1
35797	M14 240480	2014	B	B: P1.19,15: F4-28: ST-11302	cc32	5	3	5	1	1	1	1	-	0.861	6	3
35798	M14 240481	2014	B	B: P1.22,14: F5-9: ST-162	cc162	26	551	63	21	21	2	-	0.854	-	1	1
35799	M14 240482	2014	W	W: P1.5,2: F1-1: ST-11	cc11	8	10	1	22	22	2	-	0.854	-	1	1
35800	M14 240485	2014	W	W: P1.5,2: F1-1: ST-11	cc11	8	10	1	22	22	2	-	0.854	-	1	1
35801	M14 240486	2014	W	W: P1.5,2: F1-1: ST-11	cc11	8	10	1	22	22	2	-	0.854	-	1	1
35802	M14 240487	2014	Y	Y: P1.5-1,10-4: F4-1: ST-1655	cc23	11	35	2	25	25	2	-	0.85	-	1	1
[truncated: 12 more rows]

## Sheet: Sheet3
id	isolate	NEIS0350
18968	M10 240474	120
18969	M10 240478	10
19023	M10 240473	11
19024	M10 240480	10
19025	M10 240481	30
19026	M10 240482	160
19027	M10 240484	10
19028	M10 240485	11
19029	M10 240487	120
19030	M10 240489	127
19031	M10 240490	11
19032	M10 240498	113
19958	M10 240476	55
19959	M10 240499	30
19960	M10 240500	13
19961	M10 240502	3
19962	M10 240503	35
19963	M10 240505	35
19964	M10 240507	177
19965	M10 240508	215
19966	M10 240511	11
19967	M10 240512	10
19968	M10 240514	10
19969	M10 240515	120
19970	M10 240520	35
19971	M10 240521	194
19972	M10 240522	10
19973	M10 240525	3
19974	M10 240527	120
19975	M10 240528	11
19976	M10 240530	177
19977	M10 240531	35
19978	M10 240532	10
19979	M10 240534	35
19980	M10 240536	35
19981	M10 240540	35
19982	M10 240546	125
19983	M10 240547	3
19984	M10 240548	195
19985	M10 240549	10
19986	M10 240550	97
19987	M10 240553	11
19988	M10 240556	13
19989	M10 240558	13
19990	M10 240559	3
19991	M10 240566	1
19992	M10 240568	216
19993	M10 240569	18
19994	M10 240570	113
19995	M10 240572	11
19996	M10 240578	3
19997	M10 240579	171
19998	M10 240580	35
19999	M10 240581	46
20000	M10 240582	3
20001	M10 240583	11
20002	M10 240585	10
20003	M10 240586	10
20004	M10 240587	14
20005	M10 240589	13
20006	M10 240590	35
20007	M10 240591	127
20008	M10 240592	13
20009	M10 240595	217
20010	M10 240597	113
20011	M10 240598	196
20012	M10 240602	11
20013	M10 240604	10
20014	M10 240605	10
20015	M10 240606	29
20016	M10 240607	10
20017	M10 240611	3
20018	M10 240612	120
20019	M10 240613	11
20020	M10 240614	218
20021	M10 240616	9
20022	M10 240617	108
20023	M10 240618	8
20024	M10 240619	10
20025	M10 240621	108
20026	M10 240622	11
20027	M10 240623	219
20028	M10 240624	11
20029	M10 240626	11
20030	M10 240627	3
20031	M10 240631	120
20032	M10 240632	35
20033	M10 240633	35
20034	M10 240634	13
20035	M10 240636	11
20036	M10 240638	30
20037	M10 240639	108
20038	M10 240640	30
20039	M10 240641	9
20040	M10 240642	11
20041	M10 240643	35
20042	M10 240644	120
20043	M10 240645	120
20044	M10 240649	30
20045	M10 240650	113
20046	M10 240651	1
20047	M10 240652	30
20048	M10 240657	220
20049	M10 240659	197
20050	M10 240661	11
20051	M10 240662	10
20052	M10 240665	221
20053	M10 240666	30
20054	M10 240668	30
20055	M10 240669	13
20056	M10 240670	120
20057	M10 240671	10
20058	M10 240674	10
20059	M10 240675	112
20060	M10 240676	222
20061	M10 240677	215
20062	M10 240678	13
20063	M10 240681	13
20064	M10 240682	120
20065	M10 240683	18
20066	M10 240684	223
20067	M10 240685	35
20068	M10 240687	8
20069	M10 240689	10
20070	M10 240690	10
20071	M10 240693	8
20072	M10 240694	30
20073	M10 240698	47
20074	M10 240700	35
20075	M10 240701	614
20076	M10 240702	10
20077	M10 240703	224
20078	M10 240704	120
20079	M10 240705	10
20080	M10 240707	10
20081	M10 240708	120
20082	M10 240709	120
20083	M10 240711	30
20084	M10 240712	225
20085	M10 240713	11
20086	M10 240716	127
20087	M10 240717	125
20088	M10 240718	8
20089	M10 240719	3
20090	M10 240720	120
20091	M10 240721	13
20092	M10 240722	13
20093	M10 240723	10
20094	M10 240724	10
20095	M10 240728	120
20096	M10 240729	120
20097	M10 240730	48
20098	M10 240731	30
20099	M10 240732	35
20100	M10 240733	226
20101	M10 240737	227
20102	M10 240742	228
20103	M10 240743	120
20104	M10 240745	35
20105	M10 240746	10
20106	M10 240747	10
20107	M10 240748	10
20108	M10 240749	10
20109	M10 240750	13
20110	M10 240751	125
20111	M10 240752	11
20112	M10 240753	3
20113	M10 240754	10
20114	M10 240756	9
20115	M10 240759	30
20116	M10 240761	10
20117	M10 240762	10
20118	M10 240763	33
20119	M10 240766	229
20120	M10 240767	3
20121	M10 240768	120
20122	M10 240770	120
20123	M10 240771	47
20124	M10 240772	11
20125	M10 240773	10
20126	M10 240774	11
20127	M10 240775	10
20128	M10 240776	35
20129	M10 240777	35
20130	M10 240778	230
20131	M10 240779	231
20132	M10 240781	35
20133	M10 240783	11
20134	M10 240785	13
20135	M10 240786	35
20136	M10 240787	35
20137	M10 240788	113
20138	M10 240789	120
20139	M10 240790	3
20140	M10 240793	13
20141	M10 240794	3
20142	M10 240796	115
20143	M10 240798	35
20144	M10 240799	125
20145	M10 240803	10
20146	M10 240804	35
20147	M10 240805	11
20148	M10 240807	10
20149	M10 240808	120
20150	M10 240809	10
20151	M10 240810	30
20152	M10 240811	11
20153	M10 240814	10
20154	M10 240817	10
20155	M10 240818	105
20156	M10 240819	30
20157	M10 240820	10
20158	M10 240821	10
20159	M10 240822	9
20160	M10 240823	10
20161	M10 240824	3
20162	M10 240825	8
20163	M10 240826	11
20164	M11 240000	13
20165	M11 240001	11
20166	M11 240002	37
20167	M11 240003	198
20168	M11 240004	11
20169	M11 240005	35
20170	M11 240006	3
20171	M11 240007	35
20172	M11 240008	199
20173	M11 240010	120
20174	M11 240011	13
20175	M11 240012	10
20176	M11 240013	232
20177	M11 240014	127
20178	M11 240015	13
20179	M11 240016	343
20180	M11 240017	195
20181	M11 240018	10
20182	M11 240019	233
20183	M11 240021	3
20184	M11 240022	11
20185	M11 240023	10
20186	M11 240024	10
20187	M11 240025	120
20188	M11 240026	120
20189	M11 240027	8
20190	M11 240028	8
20191	M11 240029	234
20192	M11 240030	120
20193	M11 240031	35
20194	M11 240032	11
20195	M11 240034	120
20196	M11 240035	10
20197	M11 240036	35
20198	M11 240037	3
20199	M11 240038	112
20200	M11 240039	344
20201	M11 240040	10
20202	M11 240041	200
20203	M11 240042	127
20204	M11 240043	35
20205	M11 240044	120
20206	M11 240045	18
20207	M11 240046	125
20208	M11 240047	113
20209	M11 240048	8
20210	M11 240050	125
20211	M11 240052	9
20212	M11 240053	13
20213	M11 240054	10
20214	M11 240055	10
20215	M11 240056	223
20216	M11 240057	10
20217	M11 240058	235
20218	M11 240059	10
20219	M11 240060	105
20220	M11 240061	236
20221	M11 240062	30
20222	M11 240063	9
20223	M11 240064	9
20224	M11 240065	35
20225	M11 240066	11
20226	M11 240067	10
20227	M11 240068	30
20228	M11 240069	2
20229	M11 240070	120
20230	M11 240071	48
20231	M11 240072	30
20232	M11 240073	30
20233	M11 240074	1
20234	M11 240076	1
20235	M11 240077	120
20236	M11 240079	113
20237	M11 240081	10
20238	M11 240082	3
20239	M11 240083	9
20240	M11 240084	18
20241	M11 240085	13
20242	M11 240086	120
20243	M11 240088	10
20244	M11 240094	10
20245	M11 240096	35
20246	M11 240097	30
20247	M11 240099	10
20248	M11 240100	35
20249	M11 240108	201
20250	M11 240109	30
20251	M11 240110	10
20252	M11 240111	202
20253	M11 240112	13
20254	M11 240113	125
20255	M11 240115	113
20256	M11 240116	35
20257	M11 240117	105
20258	M11 240119	202
20259	M11 240121	108
20260	M11 240122	11
20261	M11 240123	1
20263	M11 240125	10
20264	M11 240126	35
20265	M11 240128	11
20266	M11 240129	47
20267	M11 240131	30
20268	M11 240132	231
20269	M11 240133	18
20270	M11 240134	1
20271	M11 240137	125
20272	M11 240139	11
20273	M11 240145	203
20274	M11 240146	30
20275	M11 240147	125
20276	M11 240148	113
20277	M11 240149	10
20278	M11 240150	120
20279	M11 240151	120
20280	M11 240152	13
20281	M11 240157	35
20282	M11 240161	237
20283	M11 240163	10
20284	M11 240164	120
20285	M11 240165	30
20286	M11 240166	35
20287	M11 240167	8
20288	M11 240168	10
20289	M11 240170	195
20290	M11 240173	113
20291	M11 240174	29
20292	M11 240175	3
20293	M11 240176	125
20294	M11 240180	120
20295	M11 240181	238
20296	M11 240182	3
20297	M11 240183	37
20298	M11 240185	239
20299	M11 240188	10
20300	M11 240189	47
20301	M11 240191	204
20302	M11 240192	35
20303	M11 240193	120
20304	M11 240195	13
20305	M11 240203	13
20306	M11 240206	9
20307	M11 240207	10
20308	M11 240209	30
20309	M11 240210	35
20310	M11 240211	30
20311	M11 240212	30
20312	M11 240213	10
20313	M11 240214	127
20314	M11 240215	35
20315	M11 240216	35
20316	M11 240226	120
20317	M11 240227	35
20318	M11 240231	9
20319	M11 240232	2
20320	M11 240233	48
20321	M11 240234	125
20322	M11 240236	11
20323	M11 240237	240
20324	M11 240241	10
20325	M11 240242	10
20326	M11 240243	11
20327	M11 240244	13
20328	M11 240246	8
20329	M11 240247	105
20330	M11 240248	10
20331	M11 240249	241
20332	M11 240251	120
20333	M11 240255	10
20334	M11 240256	10
20335	M11 240258	35
20336	M11 240259	9
20337	M11 240261	9
20338	M11 240262	2
20339	M11 240263	35
20340	M11 240265	120
20341	M11 240266	302
20342	M11 240268	10
20343	M11 240269	10
20344	M11 240275	120
20345	M11 240276	10
20346	M11 240277	35
20347	M11 240278	35
20348	M11 240280	29
20349	M11 240281	120
20350	M11 240282	108
20351	M11 240283	35
20352	M11 240284	11
20353	M11 240285	111
20354	M11 240286	33
20355	M11 240287	144
20356	M11 240289	195
20357	M11 240290	125
20358	M11 240291	10
20359	M11 240294	105
20360	M11 240295	205
20361	M11 240296	242
20362	M11 240297	125
20363	M11 240298	35
20364	M11 240299	10
20365	M11 240302	9
20366	M11 240303	30
20367	M11 240304	47
20368	M11 240305	10
20369	M11 240306	10
20370	M11 240309	30
20371	M11 240311	113
20372	M11 240312	35
20373	M11 240313	35
20374	M11 240314	11
20375	M11 240315	11
20376	M11 240316	229
20377	M11 240317	120
20378	M11 240318	11
20379	M11 240319	35
20380	M11 240322	35
20381	M11 240323	8
20382	M11 240324	3
20383	M11 240326	35
20384	M11 240328	10
20385	M11 240330	11
20386	M11 240333	16
20387	M11 240334	11
20388	M11 240335	30
20389	M11 240337	243
20390	M11 240338	11
20391	M11 240339	8
20392	M11 240341	10
20393	M11 240342	3
20394	M11 240343	10
20395	M11 240344	125
20396	M11 240346	112
20397	M11 240347	10
20398	M11 240348	125
20399	M11 240349	47
20400	M11 240350	13
20401	M11 240352	11
20402	M11 240353	30
20403	M11 240356	3
20404	M11 240358	35
20405	M11 240360	10
20406	M11 240363	10
20407	M11 240364	10
20408	M11 240365	10
20409	M11 240366	111
20410	M11 240367	10
20411	M11 240368	120
20412	M11 240369	10
20413	M11 240371	46
20414	M11 240372	35
20415	M11 240373	204
20416	M11 240375	120
20417	M11 240376	120
20418	M11 240381	30
20419	M11 240382	10
20420	M11 240383	30
20421	M11 240386	10
20422	M11 240387	105
20423	M11 240388	244
20424	M11 240389	1
20425	M11 240390	30
20426	M11 240391	10
20427	M11 240392	3
20428	M11 240394	8
20429	M11 240395	47
20430	M11 240396	35
20431	M11 240397	11
20432	M11 240398	204
20433	M11 240399	35
20434	M11 240401	245
20435	M11 240402	173
20436	M11 240403	10
20437	M11 240405	11
20438	M11 240406	3
20439	M11 240409	120
20440	M11 240411	35
20441	M11 240412	8
20442	M11 240413	11
20443	M11 240414	13
20444	M11 240417	10
20445	M11 240420	10
20446	M11 240422	120
20447	M11 240424	14
20448	M11 240425	10
20449	M11 240427	10
20450	M11 240428	11
20451	M11 240430	206
20452	M11 240431	30
20453	M11 240434	10
20454	M11 240435	35
20455	M11 240436	11
20456	M11 240437	131
20457	M11 240440	8
20458	M11 240441	36
20459	M11 240442	35
20460	M12 240156	10
20461	M12 240160	10
20470	M11 240118	9
21092	M11 240443	256
21093	M11 240445	11
21094	M11 240446	35
21095	M11 240447	13
21096	M11 240448	3
21097	M11 240450	11
21098	M11 240451	10
21099	M11 240452	125
21100	M11 240453	30
21101	M11 240456	257
21102	M11 240457	10
21103	M11 240458	30
21104	M11 240459	30
21105	M11 240461	35
21106	M11 240463	303
21107	M11 240465	35
21108	M11 240466	206
21109	M11 240467	30
21110	M11 240469	258
21111	M11 240470	259
21112	M11 240471	8
21113	M11 240472	9
21114	M11 240473	10
21115	M11 240474	260
21116	M11 240475	33
21117	M11 240476	126
21118	M11 240477	120
21119	M11 240479	30
21120	M11 240480	120
21121	M11 240484	249
21122	M11 240485	30
21123	M11 240486	10
21124	M11 240487	261
21125	M11 240488	262
21126	M11 240489	10
21127	M11 240491	10
21128	M11 240492	10
21129	M11 240493	10
21130	M11 240494	35
21131	M11 240495	3
21132	M11 240497	9
21133	M11 240501	30
21134	M11 240502	105
21137	M11 240506	120
21138	M11 240507	35
21139	M11 240508	9
21140	M11 240509	30
21141	M11 240510	263
21142	M11 240592	10
21143	M11 240593	120
21144	M11 240594	10
21145	M11 240595	51
21146	M11 240597	11
21147	M11 240598	125
21148	M11 240599	35
21151	M11 240657	35
21152	M11 240707	10
21153	M11 240710	35
21154	M11 240712	10
21155	M11 240713	11
21156	M11 240716	9
21157	M11 240717	35
21158	M11 240719	35
21159	M11 240721	9
21160	M11 240723	264
21161	M11 240724	113
21162	M11 240725	120
21163	M11 240726	10
21164	M11 240727	5
21165	M11 240728	198
21167	M11 240731	35
21168	M11 240733	11
21169	M11 240734	35
21170	M11 240735	11
21171	M11 240736	10
21172	M11 240737	35
21173	M11 240738	265
21174	M11 240740	304
21175	M11 240741	234
21176	M11 240742	220
21177	M11 240743	30
21178	M11 240745	35
21179	M11 240749	3
21180	M11 240750	120
21181	M11 240762	30
21182	M11 240763	266
21183	M11 240765	35
21184	M11 240766	13
21186	M11 240771	18
21187	M11 240772	35
21188	M11 240773	13
21189	M11 240774	120
21190	M11 240775	120
21191	M11 240776	11
21192	M11 240779	35
21193	M11 240780	35
21194	M11 240781	120
21195	M11 240783	206
21196	M11 240785	1
21197	M11 240787	267
21198	M11 240788	35
21199	M11 240789	35
21200	M11 240790	207
21201	M11 240793	35
21202	M11 240796	120
21203	M11 240798	10
21204	M11 240799	3
21205	M11 240801	35
21206	M11 240802	10
21207	M11 240803	30
21208	M11 240941	183
21209	M11 240942	30
21210	M11 240945	13
21211	M11 240946	126
21212	M11 240948	125
21213	M11 240949	9
21214	M11 240953	10
21215	M11 240954	11
21216	M11 240975	10
21217	M11 240976	125
21218	M11 240977	125
21219	M11 240978	10
21220	M11 240979	11
21221	M11 240980	125
21222	M11 240981	10
21223	M11 240982	35
21224	M11 240983	268
21225	M11 240984	269
21226	M11 240986	11
21227	M11 240987	35
21228	M11 240988	9
21229	M11 240991	35
21230	M11 240992	10
21231	M11 240993	120
21232	M11 240994	105
21233	M11 240995	11
21234	M11 241013	13
21235	M11 241014	113
21236	M11 241015	10
21237	M11 241016	223
21238	M11 241018	10
21239	M11 241019	3
21240	M11 241023	30
21241	M11 241024	120
21242	M11 241025	29
21243	M11 241026	11
21244	M11 241027	11
21245	M11 241028	10
21246	M11 241031	9
21247	M11 241032	10
21248	M11 241033	120
21249	M11 241034	115
21250	M11 241035	35
21251	M11 241036	120
21252	M11 241037	11
21253	M11 241039	105
21254	M11 241040	35
21255	M11 241042	35
21256	M11 241043	183
21257	M11 241044	10
21258	M11 241046	10
21259	M11 241047	35
21260	M11 241048	30
21261	M11 241050	10
21262	M11 241051	35
21263	M11 241054	10
21264	M11 241055	113
21265	M11 241057	270
21266	M11 241058	166
21267	M11 241059	11
21268	M11 241060	8
21269	M11 241061	120
21270	M11 241063	9
21271	M11 241064	35
21272	M11 241065	35
21273	M11 241066	10
21274	M11 241067	35
21275	M11 241068	125
21276	M11 241069	35
21277	M11 241072	120
21278	M11 241073	10
21279	M11 241074	30
21280	M11 241075	8
21281	M11 241076	125
21282	M11 241077	11
21283	M11 241078	35
21284	M12 240000	10
21285	M12 240001	11
21286	M12 240002	13
21287	M12 240003	11
21288	M12 240004	10
21289	M12 240006	11
21290	M12 240008	9
21291	M12 240009	13
21292	M12 240010	10
21293	M12 240011	35
21294	M12 240012	35
21295	M12 240013	35
21296	M12 240014	10
21297	M12 240015	120
21298	M12 240016	10
21299	M12 240018	10
21300	M12 240019	127
21301	M12 240020	160
21302	M12 240021	10
21303	M12 240022	125
21304	M12 240024	35
21305	M12 240027	10
21306	M12 240028	125
21307	M12 240029	11
21308	M12 240030	30
21309	M12 240031	116
21310	M12 240032	113
21311	M12 240033	105
21312	M12 240034	120
21313	M12 240035	10
21314	M12 240036	10
21315	M12 240038	30
21316	M12 240039	10
21317	M12 240040	120
21318	M12 240041	160
21319	M12 240042	113
21320	M12 240044	18
21321	M12 240045	13
21322	M12 240046	11
21323	M12 240047	125
21324	M12 240048	271
21325	M12 240051	166
21326	M12 240054	272
21327	M12 240057	120
21328	M12 240058	272
21329	M12 240059	11
21330	M12 240061	105
21331	M12 240062	18
21332	M12 240063	125
21333	M12 240066	120
21334	M12 240067	10
21335	M12 240069	1
21336	M12 240070	173
21337	M12 240071	208
21338	M12 240072	35
21339	M12 240076	30
21340	M12 240077	13
21341	M12 240078	10
21342	M12 240079	11
21343	M12 240080	35
21344	M12 240081	13
21345	M12 240083	8
21346	M12 240084	35
21347	M12 240085	10
21348	M12 240086	120
21349	M12 240088	9
21350	M12 240090	30
21351	M12 240092	125
21352	M12 240093	8
21353	M12 240094	10
21354	M12 240095	10
21355	M12 240097	13
21356	M12 240098	35
21357	M12 240099	30
21358	M12 240100	120
21359	M12 240101	105
21360	M12 240103	10
21361	M12 240104	223
21362	M12 240105	11
21363	M12 240107	105
21364	M12 240111	105
21365	M12 240114	10
21366	M12 240115	35
21367	M12 240116	120
21368	M12 240117	13
21369	M12 240118	10
21370	M12 240120	30
21371	M12 240121	9
21372	M12 240122	35
21373	M12 240123	35
21374	M12 240124	113
21375	M12 240125	10
21376	M12 240126	10
21377	M12 240127	10
21378	M12 240128	10
21379	M12 240131	10
21380	M12 240132	9
21381	M12 240133	10
21382	M12 240134	10
21383	M12 240135	11
21384	M12 240138	10
21385	M12 240142	10
21386	M12 240144	10
21387	M12 240145	273
21388	M12 240146	30
21390	M12 240149	270
21391	M12 240150	5
21392	M12 240151	125
21393	M12 240153	120
21394	M12 240155	113
21396	M12 240158	8
21398	M12 240161	10
21399	M12 240166	35
21400	M12 240167	10
21401	M12 240168	10
21402	M12 240169	10
21403	M12 240171	35
21404	M12 240174	35
21405	M12 240175	30
21406	M12 240176	11
21407	M12 240177	105
21408	M12 240180	35
21409	M12 240181	48
21410	M12 240184	35
21411	M12 240186	13
21412	M12 240187	10
21413	M12 240188	18
21414	M12 240191	10
21415	M12 240194	3
21416	M12 240197	30
21417	M12 240200	10
21418	M12 240201	120
21419	M12 240202	183
21420	M12 240203	3
21421	M12 240205	30
21422	M12 240206	11
21423	M12 240207	10
21424	M12 240208	224
21425	M12 240211	120
21426	M12 240213	10
21427	M12 240214	11
21428	M12 240215	125
21429	M12 240216	11
21430	M12 240219	120
21431	M12 240220	10
21432	M12 240222	8
21433	M12 240223	11
21434	M12 240224	113
21435	M12 240225	125
21436	M12 240226	275
21437	M12 240227	10
21438	M12 240228	125
21439	M12 240229	11
21440	M12 240230	35
21441	M12 240231	3
21442	M12 240232	276
21443	M12 240237	35
21444	M12 240238	11
21445	M12 240239	120
21446	M12 240240	10
21447	M12 240241	35
21448	M12 240242	35
21449	M12 240243	120
21450	M12 240245	120
21451	M12 240248	35
21452	M12 240249	10
21453	M12 240250	142
21454	M12 240251	9
21455	M12 240252	13
21456	M12 240253	277
21457	M12 240254	277
21458	M12 240255	1
21460	M12 240257	10
21461	M12 240259	173
21462	M12 240261	242
21463	M12 240263	209
21464	M12 240264	113
21465	M12 240267	120
21466	M12 240272	35
21467	M12 240273	125
21468	M12 240274	10
21469	M12 240277	278
21470	M12 240284	10
21471	M12 240287	11
21472	M12 240288	35
21473	M12 240289	35
21474	M12 240290	195
21475	M12 240291	35
21476	M12 240293	35
21477	M12 240294	120
21478	M12 240296	10
21479	M12 240299	10
21480	M12 240300	35
21481	M12 240301	10
21482	M12 240302	13
21483	M12 240303	11
21484	M12 240305	113
21485	M12 240306	11
21486	M12 240307	120
21487	M12 240308	10
21488	M12 240309	13
21489	M12 240310	120
21490	M12 240314	195
21491	M12 240315	13
21492	M12 240317	10
21493	M12 240318	35
21494	M12 240319	10
21495	M12 240320	232
21496	M12 240321	13
21497	M12 240322	35
21498	M12 240323	120
21499	M12 240324	10
21500	M12 240325	113
21501	M12 240326	125
21502	M12 240328	35
21503	M12 240329	30
21504	M12 240330	279
21505	M12 240332	112
21506	M12 240333	9
21507	M12 240334	13
21508	M12 240335	30
26732	M13 240559	183
27778	M12 240336	13
27779	M12 240338	105
27780	M12 240340	309
27781	M12 240341	11
27782	M12 240347	127
27783	M12 240349	10
27784	M12 240644	33
27785	M12 240647	30
27786	M12 240650	10
27787	M12 240651	10
27788	M12 240652	10
27789	M12 240653	11
27790	M12 240654	10
27791	M12 240656	13
27792	M12 240658	13
27793	M12 240659	9
27794	M12 240664	9
27795	M12 240667	10
27796	M12 240668	113
27797	M12 240669	310
27798	M12 240672	10
27799	M12 240674	11
27800	M12 240675	120
27801	M12 240678	120
27802	M12 240681	10
27803	M12 240682	105
27804	M12 240683	11
27805	M12 240684	30
27806	M12 240685	14
27807	M12 240688	11
27808	M12 240691	11
27809	M12 240693	3
27810	M12 240694	120
27811	M12 240697	113
27812	M12 240699	13
27813	M12 240703	125
27814	M12 240704	127
27815	M12 240705	29
27816	M12 240706	10
27817	M12 240707	120
27818	M12 240712	10
27819	M12 240714	3
27820	M12 240718	30
27821	M12 240719	11
27822	M12 240720	113
27823	M12 240724	125
27824	M12 240725	233
27825	M12 240729	11
27826	M12 240730	3
27827	M12 240732	3
27828	M12 240733	311
27829	M12 240735	3
27830	M12 240736	108
27831	M12 240737	120
27832	M12 240739	13
27833	M12 240741	113
27834	M12 240745	120
27835	M12 240749	11
27836	M12 240750	10
27837	M12 240752	10
27838	M12 240758	30
27839	M12 240763	127
27840	M12 240765	30
27841	M12 240769	11
27842	M12 240773	312
27843	M12 240778	127
27844	M12 240781	30
27845	M12 240782	313
27846	M12 240783	10
27847	M12 240785	10
27848	M12 240786	37
27849	M12 240787	127
27850	M12 240790	3
27851	M12 240793	11
27852	M12 240794	314
27853	M12 240803	3
27854	M12 240805	35
27855	M12 240806	315
27856	M12 240807	13
27857	M12 240808	47
27858	M12 240809	233
27859	M12 240810	120
27860	M12 240812	316
27861	M12 240814	30
27862	M12 240817	3
27863	M12 240818	3
27864	M12 240819	9
27865	M12 240825	10
27866	M12 240827	11
27867	M12 240831	120
27868	M12 240834	316
27869	M12 240842	11
27870	M12 240843	317
27871	M12 240844	127
27872	M12 240846	10
27873	M12 240847	10
27874	M12 240848	120
27875	M12 240849	10
27876	M12 240850	10
27877	M12 240851	11
27878	M12 240852	120
27879	M12 240853	120
27880	M12 240858	125
27881	M12 240861	113
27882	M12 240865	11
27883	M12 240866	277
27884	M12 240867	120
27885	M12 240868	318
27886	M12 240872	30
27887	M12 240873	8
27888	M12 240874	3
27889	M12 240876	2
27890	M12 240877	11
27891	M12 240878	30
27892	M12 240879	11
27893	M12 240880	10
27894	M12 240884	3
27895	M12 240887	10
27896	M12 240893	120
27897	M12 240896	319
27898	M12 240899	226
27899	M12 240900	120
27900	M12 240901	320
27901	M12 240902	10
27902	M13 240000	30
27903	M13 240001	9
27904	M13 240003	120
27905	M13 240004	229
27906	M13 240005	120
27907	M13 240006	127
27908	M13 240007	10
27909	M13 240009	13
27910	M13 240012	10
27911	M13 240014	11
27912	M13 240017	3
27913	M13 240019	341
27914	M13 240021	166
27915	M13 240023	2
27916	M13 240029	279
27917	M13 240030	11
27918	M13 240031	112
27919	M13 240032	2
27920	M13 240033	11
27921	M13 240036	11
27922	M13 240039	120
27923	M13 240040	120
27924	M13 240041	13
27925	M13 240042	321
27926	M13 240043	120
27927	M13 240045	11
27928	M13 240046	30
27929	M13 240047	13
27930	M13 240048	11
27931	M13 240051	229
27932	M13 240054	120
27933	M13 240057	127
27934	M13 240063	166
27935	M13 240067	120
27936	M13 240069	11
27937	M13 240072	120
27938	M13 240074	127
27939	M13 240075	30
27940	M13 240076	322
27941	M13 240078	127
27942	M13 240081	1
27943	M13 240084	323
27944	M13 240085	208
27945	M13 240086	233
27946	M13 240088	10
27947	M13 240090	195
27948	M13 240091	30
27949	M13 240095	120
27950	M13 240097	149
27951	M13 240098	10
27952	M13 240105	11
27953	M13 240106	3
27954	M13 240111	10
27955	M13 240112	120
27956	M13 240115	10
27957	M13 240118	3
27958	M13 240120	113
27959	M13 240121	11
27960	M13 240123	113
27961	M13 240124	11
27962	M13 240125	115
27963	M13 240127	238
27964	M13 240130	3
27965	M13 240132	125
27966	M13 240135	10
27967	M13 240142	14
27968	M13 240143	30
27969	M13 240145	47
27970	M13 240147	120
27971	M13 240148	8
27972	M13 240150	30
27973	M13 240153	8
27974	M13 240157	10
27975	M13 240160	324
27976	M13 240161	233
27977	M13 240164	120
27978	M13 240166	10
27979	M13 240167	120
27980	M13 240170	8
27981	M13 240171	113
27982	M13 240172	30
27983	M13 240173	325
27984	M13 240174	13
27985	M13 240175	197
27986	M13 240181	113
27987	M13 240183	3
27988	M13 240187	125
27989	M13 240191	30
27990	M13 240192	30
27991	M13 240197	11
27992	M13 240199	105
27993	M13 240202	11
27994	M13 240204	326
27995	M13 240205	10
27996	M13 240206	10
27997	M13 240207	11
27998	M13 240210	10
27999	M13 240211	11
28000	M13 240212	14
28001	M13 240213	11
28002	M13 240216	3
28003	M13 240217	10
28004	M13 240224	11
28005	M13 240227	11
28006	M13 240228	10
28007	M13 240229	327
28009	M13 240231	10
28010	M13 240232	328
28011	M13 240233	13
28012	M13 240234	113
28013	M13 240235	10
28014	M13 240237	10
28015	M13 240239	246
28016	M13 240245	120
28017	M13 240248	127
28018	M13 240249	125
28019	M13 240250	33
28020	M13 240255	11
28021	M13 240256	30
28022	M13 240257	329
28023	M13 240258	330
28024	M13 240261	113
28025	M13 240262	331
28026	M13 240263	10
28027	M13 240264	11
28028	M13 240271	197
28029	M13 240272	505
28030	M13 240273	10
28031	M13 240274	120
28032	M13 240275	10
28033	M13 240277	332
28034	M13 240281	333
28035	M13 240289	9
28036	M13 240292	13
28037	M13 240294	30
28038	M13 240384	269
28039	M13 240385	10
28040	M13 240386	342
28041	M13 240397	215
28042	M13 240400	120
28043	M13 240406	127
28044	M13 240409	9
28045	M13 240411	120
28046	M13 240413	10
28047	M13 240414	30
28048	M13 240417	8
28049	M13 240418	10
28050	M13 240421	120
28051	M13 240422	30
28052	M13 240424	18
28053	M13 240426	11
28054	M13 240427	108
28055	M13 240428	35
28056	M13 240429	120
28057	M13 240434	11
28058	M13 240437	125
28059	M13 240438	10
28060	M13 240448	35
28061	M13 240449	10
28062	M13 240450	11
28063	M13 240451	334
28064	M13 240452	10
28065	M13 240453	120
28066	M13 240455	30
28067	M13 240458	35
28068	M13 240461	13
28069	M13 240463	11
28070	M13 240466	11
28071	M13 240468	207
28072	M13 240472	335
28073	M13 240475	203
28074	M13 240476	11
28075	M13 240478	11
28076	M13 240479	10
28077	M13 240481	47
28078	M13 240483	30
28079	M12 240345	10
28080	M12 240639	1
28081	M12 240655	336
28082	M12 240679	183
28083	M12 240698	105
28084	M12 240716	1
28085	M12 240776	105
28086	M12 240854	30
28087	M12 240855	30
28088	M13 240002	260
28089	M13 240008	1
28090	M13 240022	105
28091	M13 240026	120
28092	M13 240068	1
28093	M13 240155	105
28094	M13 240162	105
28095	M13 240189	183
28096	M13 240201	10
28097	M13 240254	105
28098	M13 240280	105
28099	M13 240282	105
28100	M13 240295	105
28101	M13 240398	337
28102	M13 240401	1
28103	M13 240402	105
28104	M13 240405	105
28105	M13 240440	105
28106	M13 240460	1
28107	M12 240641	11
28108	M12 240756	11
28109	M13 240134	126
28110	M13 240198	10
28111	M13 240240	37
28112	M13 240399	10
28113	M13 240410	11
28114	M12 240337	10
28115	M12 240640	10
28116	M12 240657	10
28117	M12 240663	10
28118	M12 240671	9
28119	M12 240702	10
28120	M12 240734	234
28121	M12 240751	10
28122	M12 240754	10
28123	M12 240762	9
28124	M12 240772	9
28125	M12 240774	10
28126	M12 240789	9
28127	M12 240823	9
28128	M12 240826	10
28129	M12 240862	9
28130	M12 240881	35
28131	M12 240895	10
28132	M12 240898	10
28133	M13 240013	234
28134	M13 240015	10
28135	M13 240025	10
28136	M13 240028	10
28137	M13 240056	10
28138	M13 240066	10
28139	M13 240077	10
28140	M13 240089	9
28141	M13 240109	10
28142	M13 240114	10
28143	M13 240158	10
28144	M13 240168	10
28145	M13 240176	9
28146	M13 240185	10
28147	M13 240223	10
28148	M13 240225	10
28149	M13 240238	10
28150	M13 240246	10
28151	M13 240247	10
28152	M13 240251	10
28153	M13 240269	10
28154	M13 240283	10
28155	M13 240431	338
28156	M13 240436	10
28157	M13 240446	10
28158	M13 240457	10
28159	M13 240464	10
28160	M13 240465	9
28161	M13 240467	10
28162	M13 240469	339
28163	M13 240473	10
28164	M13 240482	10
28165	M12 240342	35
28166	M12 240343	35
28167	M12 240643	35
28168	M12 240646	35
28169	M12 240661	35
28170	M12 240701	35
28171	M12 240713	35
28172	M12 240715	35
28173	M12 240717	30
28174	M12 240728	13
28175	M12 240746	8
28176	M12 240748	35
28177	M12 240760	35
28178	M12 240767	35
28179	M12 240779	35
28180	M12 240784	30
28181	M12 240788	35
28182	M12 240791	35
28183	M12 240796	48
28184	M12 240797	48
28185	M12 240799	35
28186	M12 240801	35
28187	M12 240802	340
28188	M12 240816	35
28189	M12 240821	48
28190	M12 240822	35
28191	M12 240840	35
28192	M12 240857	35
28193	M12 240885	35
28194	M12 240886	35
28195	M12 240888	35
28196	M12 240894	35
28197	M12 240897	332
28198	M13 240011	35
28199	M13 240020	9
28200	M13 240035	35
28201	M13 240044	35
28202	M13 240053	48
28203	M13 240055	9
28204	M13 240059	48
28205	M13 240064	35
28206	M13 240073	35
28207	M13 240087	35
28208	M13 240099	35
28209	M13 240102	35
28210	M13 240116	35
28211	M13 240126	105
28212	M13 240131	35
28213	M13 240136	48
28214	M13 240144	35
28215	M13 240146	35
28216	M13 240154	35
28217	M13 240165	35
28218	M13 240184	35
28219	M13 240188	35
28220	M13 240194	35
28221	M13 240200	35
28222	M13 240203	35
28223	M13 240218	35
28224	M13 240220	30
28225	M13 240226	9
28226	M13 240242	332
28227	M13 240244	35
28228	M13 240265	35
28229	M13 240267	35
28230	M13 240268	35
28231	M13 240381	35
28232	M13 240383	9
28233	M13 240396	35
28234	M13 240407	35
28235	M13 240439	35
29721	M13 240491	10
29723	M13 240555	120
29724	M13 240591	10
29725	M13 240603	10
29726	M13 240604	10
29727	M13 240545	10
29728	M13 240558	10
29729	M13 240594	10
29730	M13 240583	10
29731	M13 240510	10
29732	M13 240633	10
29733	M13 240634	10
29734	M13 240538	10
29735	M13 240515	10
29736	M13 240600	10
29737	M13 240553	10
29895	M13 240496	1
29897	M13 240500	105
29898	M13 240514	1
30136	M13 240635	10
30137	M13 240637	10
30138	M13 240649	10
30139	M13 240655	10
30140	M13 240657	10
30141	M13 240664	10
30143	M13 240667	10
30144	M13 240668	10
30145	M13 240672	10
30146	M13 240678	10
30147	M13 240680	10
30148	M13 240681	10
30149	M13 240704	9
30150	M13 240724	10
30151	M13 240726	10
30152	M13 240730	10
30153	M13 240732	10
30154	M14 240001	10
30155	M14 240002	10
30156	M14 240007	10
30157	M14 240013	10
30158	M14 240019	10
30159	M14 240022	10
30160	M14 240026	10
30161	M14 240029	10
30162	M14 240031	10
30163	M14 240042	10
30164	M14 240043	10
30165	M14 240052	10
30166	M14 240053	10
30167	M14 240054	10
30168	M14 240072	10
30169	M14 240082	10
30210	M13 240691	105
30211	M13 240735	35
30212	M14 240004	105
30213	M14 240094	105
30214	M14 240100	1
30215	M14 240107	1
31162	M14 240329	223
34502	M13 240484	35
34503	M13 240485	35
34504	M13 240486	120
34505	M13 240488	116
34506	M13 240490	11
34507	M13 240495	10
34508	M13 240497	120
34509	M13 240499	120
34510	M13 240501	10
34511	M13 240502	3
34512	M13 240503	9
34513	M13 240507	493
34514	M13 240508	494
34515	M13 240516	3
34516	M13 240519	495
34517	M13 240525	9
35227	09.1126.Y	11
35228	09.1208.P	30
35229	09.1211.Y	11
35230	09.1292.T	30
35231	09.1331.Y	113
35232	09.1368.F	520
35233	09.1385.H	35
35234	09.1402.B	125
35235	09.1453.F	10
35236	09.1507.Q	10
35237	09.1514.A	11
35238	09.1557.B	125
35239	09.1580.V	3
35240	09.1595.J	233
35241	09.1619.R	10
35242	09.1857.M	11
35243	09.1858.V	120
35244	09.1893.P	120
35245	09.1976.T	30
35246	09.1999.X	30
35247	09.2014.G	10
35248	09.2045.J	10
35249	09.2061.P	35
35250	09.2082.C	10
35251	09.2204.A	10
35252	09.2270.V	402
35253	09.2386.V	195
35254	09.2439.W	1
35255	09.2522.Q	13
35256	09.2622.N	120
35257	09.2658.E	10
35258	09.2799.W	9
35259	09.2935.B	35
35260	09.2939.N	10
35261	09.2961.S	10
35262	09.3026.N	11
35263	09.3029.P	11
35264	09.3063.L	30
35265	09.3091.W	30
35266	09.3167.H	30
35267	09.3271.E	10
35268	09.3302.K	30
35269	09.3351.N	120
35270	09.3368.H	8
35271	10.1171.X	206
35272	10.1177.P	3
35273	10.1199.K	120
35274	10.1352.R	125
35275	10.1430.T	3
35276	10.1516.S	120
35277	10.1718.Z	8
35278	10.1746.F	30
35279	10.1962.Z	11
35280	10.2012.H	113
35281	10.2126.Z	316
35282	10.2240.T	11
35283	10.2273.P	9
35284	10.2289.A	11
35285	10.2352.E	11
35286	10.2397.V	521
35287	10.2422.K	195
35288	10.2509.N	310
35289	10.2631.L	35
35290	10.2763.M	10
35291	10.2850.R	10
35292	10.2854.Q	415
35293	10.2884.V	30
35294	10.3051.M	10
35295	10.3134.R	9
35296	11.1071.G	195
35297	11.1190.L	10
35298	11.1286.D	10
35299	11.1312.X	13
35300	11.1376.W	3
35301	11.1392.G	120
35302	11.1426.J	10
35303	11.1479.T	10
35304	11.1489.Z	8
35305	11.1575.Q	11
35306	11.1688.D	125
35307	11.1709.B	125
35308	11.1825.A	10
35309	11.1826.C	10
35310	11.2087.F	125
35311	11.2169.T	30
35312	11.2463.D	10
35313	11.2525.L	11
35314	11.2909.Z	35
35315	11.3133.X	30
35316	11.3808.A	10
35317	11.3888.K	35
35318	11.4891.D	11
35319	11.4999.T	13
35320	11.5380.D	2
35321	11.5384.H	30
35322	11.5445.E	11
35323	11.5563.G	9
35324	11.5842.B	13
35325	11.5915.A	125
35326	11.6644.A	11
35327	11.6835.D	105
35328	11.7141.B	29
35329	12.1092.Y	35
35330	12.1192.H	127
35331	12.1222.T	35
35332	12.1512.D	35
35333	12.1555.H	9
35334	12.8515.D	30
35335	12.8534.X	10
35336	12.8840.D	35
35337	13.1012.H	11
35338	13.1296.J	9
35339	13.1297.B	30
35340	13.1370.Z	522
35341	13.1395.T	11
35342	13.1396.M	120
35343	13.1682.M	11
35344	13.2342.Z	11
35345	13.2973.F	127
35346	13.3065.D	127
35347	13.3207.X	1
35348	13.3348.S	35
35349	13.3789.S	35
35350	13.3813.B	30
35351	13.3867.V	11
35352	13.4061.L	30
35353	13.4142.L	120
35354	13.4278.S	10
35355	13.4514.P	3
35356	12.1860.E	30
35357	12.1954.S	5
35358	12.2326.H	108
35359	12.2412.W	35
35360	12.2589.T	30
35361	12.2953.Y	10
35362	12.3021.W	10
35363	12.3084.V	202
35364	12.4811.X	30
35365	12.4819.T	120
35366	12.4885.X	523
35367	12.4886.L	523
35368	12.6364.V	367
35369	12.6501.H	524
35370	12.7012.F	35
35371	12.7350.H	10
35372	12.7377.D	11
35373	12.7548.W	11
35374	12.8180.Y	525
35375	12.8381.Y	30
35376	12.8408.J	35
35377	12.8444.A	29
35378	09.1936.F	10
35379	09.2807.A	275
35380	12.3882.E	46
35381	13.4765.S	10
35382	13.4767.Q	35
35383	13.5135.Z	233
35384	13.5154.G	35
35385	13.5226.K	30
35386	13.5556.G	125
35387	13.5557.N	125
35388	13.6067.H	13
35389	13.6117.K	11
35390	13.6161.J	13
35391	13.6352.Q	35
35392	13.6756.W	10
35393	13.7214.J	9
35394	13.7552.F	10
35395	13.7896.B	18
35396	13.8092.Q	11
35397	13.8552.X	10
35422	M13 240526	266
35423	M13 240528	9
35424	M13 240529	35
35425	M13 240531	10
35426	M13 240532	10
35427	M13 240534	527
35428	M13 240535	3
35429	M13 240536	30
35430	M13 240540	30
35431	M13 240542	125
35432	M13 240543	35
35434	M13 240548	10
35435	M13 240549	35
35436	M13 240554	9
35437	M13 240560	528
35438	M13 240561	10
35439	M13 240562	30
35440	M13 240564	10
35441	M13 240565	120
35442	M13 240566	125
35443	M13 240568	120
35444	M13 240572	529
35445	M13 240573	35
35446	M13 240574	35
35447	M13 240579	120
35448	M13 240581	127
35449	M13 240588	48
35450	M13 240590	35
35451	M13 240592	11
35452	M13 240593	530
35453	M13 240595	9
35454	M13 240596	120
35455	M13 240598	10
35456	M13 240599	206
35457	M13 240601	9
35458	M13 240605	11
35459	M13 240608	2
35460	M13 240610	35
35461	M13 240611	30
35462	M13 240613	10
35463	M13 240614	402
35464	M13 240615	35
35465	M13 240618	120
35466	M13 240619	614
35467	M13 240620	10
35468	M13 240622	35
35469	M13 240623	2
35470	M13 240624	10
35471	M13 240626	10
35472	M13 240627	48
35473	M13 240632	105
35474	M13 240636	10
35475	M13 240638	30
35477	M13 240640	11
35478	M13 240641	10
35480	M13 240644	127
35481	M13 240646	30
35482	M13 240647	113
35483	M13 240648	10
35484	M13 240652	35
35485	M13 240658	11
35486	M13 240662	37
35487	M13 240663	35
35488	M13 240665	532
35489	M13 240670	10
35491	M13 240673	108
35492	M13 240675	323
35493	M13 240677	10
35494	M13 240684	120
35495	M13 240686	30
35496	M13 240690	10
35497	M13 240692	10
35498	M13 240693	232
35499	M13 240694	35
35500	M13 240695	223
35501	M13 240696	48
35502	M13 240697	105
35503	M13 240698	9
35504	M13 240699	533
35505	M13 240702	534
35506	M13 240703	120
35507	M13 240705	10
35508	M13 240706	35
35509	M13 240708	13
35510	M13 240709	302
35511	M13 240710	8
35512	M13 240715	8
35513	M13 240716	35
35514	M13 240717	125
35515	M13 240718	120
35516	M13 240719	10
35517	M13 240720	9
35518	M13 240721	35
35519	M13 240723	535
35520	M13 240725	35
35521	M13 240729	1
35522	M13 240731	108
35523	M13 240733	9
35524	M13 240734	8
35525	M13 240737	11
35526	M13 240738	10
35527	M13 240739	125
35528	M13 240740	35
35529	M13 240742	11
35530	M13 240743	35
35531	M13 240744	35
35532	M13 240745	10
35533	M13 240746	30
35534	M13 240748	30
35535	M13 240749	35
35536	M13 240750	35
35537	M13 240751	35
35538	M13 240752	35
35539	M13 240753	10
35540	M13 240755	536
35541	M14 240003	10
35542	M14 240008	105
35543	M14 240010	35
35544	M14 240011	11
35545	M14 240012	35
35546	M14 240014	3
35547	M14 240015	48
35548	M14 240016	13
35549	M14 240017	10
35550	M14 240018	13
35551	M14 240020	10
35552	M14 240021	113
35553	M14 240023	35
35555	M14 240025	11
35556	M14 240027	13
35557	M14 240028	270
35558	M14 240030	8
35559	M14 240037	29
35560	M14 240038	9
35561	M14 240039	10
35562	M14 240045	10
35563	M14 240046	10
35564	M14 240048	242
35565	M14 240049	35
35566	M14 240055	10
35567	M14 240056	35
35568	M14 240059	11
35569	M14 240060	35
35570	M14 240061	120
35571	M14 240062	3
35572	M14 240073	120
35573	M14 240074	120
35574	M14 240075	35
35575	M14 240077	3
35576	M14 240078	125
35578	M14 240085	10
35579	M14 240087	1
35580	M14 240088	127
35581	M14 240090	10
35582	M14 240091	35
35583	M14 240093	18
35585	M14 240096	13
35586	M14 240098	10
35587	M14 240099	30
35588	M14 240101	3
35589	M14 240103	30
35592	M14 240108	35
35593	M14 240109	120
35594	M14 240110	323
35595	M14 240111	35
35596	M14 240112	537
35598	M14 240116	10
35599	M14 240117	35
35600	M14 240118	35
35601	M14 240119	47
35602	M14 240120	112
35603	M14 240121	5
35604	M14 240122	3
35605	M14 240123	8
35606	M14 240124	10
35609	M14 240127	195
35610	M14 240129	9
35611	M14 240130	35
35612	M14 240133	11
35613	M14 240134	538
35614	M14 240135	10
35615	M14 240136	35
35616	M14 240140	35
35617	M14 240141	10
35618	M14 240142	539
35619	M14 240143	3
35620	M14 240144	35
35621	M14 240145	10
35622	M14 240147	10
35623	M14 240149	11
35624	M14 240150	10
35625	M14 240153	10
35626	M14 240154	120
35627	M14 240157	35
35628	M14 240168	1
35629	M14 240174	30
35630	M14 240175	324
35631	M14 240177	11
35632	M14 240178	10
35633	M14 240179	120
35634	M14 240180	10
35635	M14 240199	540
35636	M14 240201	120
35637	M14 240202	11
35638	M14 240204	10
35639	M14 240205	541
35640	M14 240206	11
35641	M14 240208	11
35642	M14 240210	35
35643	M14 240211	10
35644	M14 240213	11
35645	M14 240215	125
35646	M14 240217	120
35647	M14 240218	232
35648	M14 240220	35
35649	M14 240221	35
35650	M14 240222	105
35651	M14 240223	10
35652	M14 240224	10
35653	M14 240225	35
35654	M14 240226	35
35655	M14 240227	3
35656	M14 240232	10
35657	M14 240233	10
35658	M14 240234	231
35659	M14 240236	105
35660	M14 240237	35
35661	M14 240238	47
35662	M14 240241	30
35663	M14 240242	13
35664	M14 240245	10
35665	M14 240246	35
35666	M14 240248	3
35667	M14 240249	105
35668	M14 240251	13
35669	M14 240252	11
35670	M14 240253	10
35671	M14 240254	13
35672	M14 240255	1
35673	M14 240256	10
35674	M14 240257	10
35675	M14 240258	10
35676	M14 240259	30
35677	M14 240261	11
35678	M14 240264	125
35679	M14 240265	120
35680	M14 240266	30
35681	M14 240267	113
35682	M14 240271	3
35683	M14 240273	542
35684	M14 240276	35
35685	M14 240277	48
35686	M14 240278	10
35687	M14 240279	10
35688	M14 240280	1
35689	M14 240282	10
35690	M14 240283	10
35691	M14 240284	35
35692	M14 240285	35
35693	M14 240286	105
35694	M14 240287	35
35695	M14 240289	13
35696	M14 240291	35
35697	M14 240293	9
35698	M14 240295	543
35699	M14 240296	111
35700	M14 240299	10
35701	M14 240300	30
35702	M14 240304	10
35703	M14 240305	125
35704	M14 240306	195
35705	M14 240309	13
35706	M14 240310	105
35707	M14 240311	204
35708	M14 240312	9
35709	M14 240313	35
35710	M14 240314	8
35712	M14 240316	125
35713	M14 240317	127
35714	M14 240319	125
35715	M14 240321	125
35716	M14 240325	544
35717	M14 240327	545
35718	M14 240328	202
35719	M14 240331	113
35720	M14 240333	114
35721	M14 240335	35
35722	M14 240337	10
35723	M14 240338	30
35724	M14 240342	3
35725	M14 240343	10
35726	M14 240344	30
35727	M14 240345	127
35728	M14 240346	10
35729	M14 240347	10
35730	M14 240350	3
35731	M14 240351	10
35732	M14 240353	10
35733	M14 240354	125
35734	M14 240356	127
35735	M14 240357	13
35736	M14 240359	30
35737	M14 240360	30
35738	M14 240361	9
35739	M14 240365	127
35740	M14 240367	120
35741	M14 240368	13
35742	M14 240369	33
35744	M14 240374	546
35745	M14 240377	10
35746	M14 240378	35
35747	M14 240379	532
35748	M14 240382	30
35749	M14 240383	547
35750	M14 240384	127
35751	M14 240386	433
35752	M14 240387	13
35753	M14 240388	10
35754	M14 240389	10
35755	M14 240390	11
35757	M14 240393	125
35758	M14 240396	10
35759	M14 240400	326
35760	M14 240403	548
35761	M14 240404	35
35762	M14 240405	1
35763	M14 240406	10
35764	M14 240407	13
35765	M14 240408	120
35766	M14 240410	10
35767	M14 240423	35
35768	M14 240425	10
35770	M14 240428	11
35771	M14 240429	10
35772	M14 240431	35
35773	M14 240432	35
35774	M14 240434	120
35775	M14 240436	1
35776	M14 240437	11
35777	M14 240441	549
35778	M14 240451	30
35779	M14 240452	120
35780	M14 240455	10
35781	M14 240456	127
35782	M14 240463	10
35783	M14 240465	11
35784	M14 240466	120
35785	M14 240467	3
35786	M14 240468	10
35787	M14 240469	120
35788	M14 240470	10
35789	M14 240471	13
35790	M14 240472	13
35791	M14 240473	9
35792	M14 240474	10
35793	M14 240475	550
35794	M14 240476	195
35795	M14 240477	10
35796	M14 240478	10
35797	M14 240480	3
35798	M14 240481	551
35799	M14 240482	10
35800	M14 240485	10
35801	M14 240486	10
35802	M14 240487	35
35803	M14 240488	120
35804	M14 240489	35
35805	M14 240490	195
35806	M14 240491	10
35807	M14 240492	10
35808	M14 240494	10
35809	M14 240495	10
[truncated: 5 more rows]
